# Supplementary material for: Volatile organic compound fluxes over a winter wheat field by PTR-Qi-TOF-MS and eddy covariance
Source: Copernicus journal article supplement (doi:10.5194/acp-22-2817-2022), 2022-03-02
Supplement: Supplementary file 2 [file acp-22-2817-2022-supplement.zip]

Archive with 3 entries (3 files):
- COV3ER_2016_dataset_summary.xlsx
- acp-22-2817-2022-supplement-title-page.pdf
- Loubet-COV3ER-wheat-2016-EC-Supp.pdf
