# Supplementary material for: Volatile organic compound fluxes over a winter wheat field by PTR-Qi-TOF-MS and eddy covariance
Source: Copernicus journal article supplement (doi:10.5194/acp-22-2817-2022), 2022-03-02
Supplement: Supplementary file 2 [file acp-22-2817-2022-supplement.zip › acp-22-2817-2022-supplement-title-page.pdf]

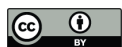

*Supplement of*

**Volatile organic compound fluxes over a winter wheat field by PTR-Qi-TOF-MS and eddy covariance**

**Benjamin Loubet et al.**

*Correspondence to:* Benjamin Loubet ([benjamin.loubet@inrae.fr](mailto:benjamin.loubet@inrae.fr))

- [acp-22-2817-2022-supplement-title-page.pdf](#)
- [COV3ER\\_2016\\_dataset\\_summary.xlsx](#)
- [Loubet-COV3ER-wheat-2016-EC-Supp.pdf](#)

The copyright of individual parts of the supplement might differ from the article licence.
