# Supplementary material for: Volatile organic compound fluxes over a winter wheat field by PTR-Qi-TOF-MS and eddy covariance
Source: Copernicus journal article supplement (doi:10.5194/acp-22-2817-2022), 2022-03-02
Supplement: Supplementary file 2 [file acp-22-2817-2022-supplement.zip › COV3ER_2016_dataset_summary.xlsx]

## Sheet: Read me
Copyright INRAE. Benjamin.Loubet@inrae.fr
Variable	Signification	units
IonMassmeasured	m/z measured	g mol-1
ExactIonMass	exact ion mass corresponding to the raw formula	g mol-1
uncertaintymasses	uncertainty on m/z due to resolution	g mol-1
Raw.formula	chemical formula best guess	-
Tentative.identification	tentative compound identification	-
Chemical.class	oxygen, nitrogen etc	-
meanMixingRatio	mean mixing ratio over the entire campaign	ppb
meanflux	mean flux over the entire campaign	nmol m-2 s-1
lod_flux	flux limit of detection over the entire campaign	nmol m-2 s-1
meanfluxugm2h	mean flux over the entire campaign	µg m-2 h-1
likelycommingfromFarm	compounds for which the mixing ratio increases significantly when wind dierction blows from the farm	-
meanMixingRatio_in_microg_m3	mean mixing ratio over the entire campaign	µg m-3
Quant0.05.MixingRatio	5% quantile mixing ratio over the entire campaign	µg m-3
Quant0.95.MixingRatio	95% quantile mixing ratio over the entire campaign	µg m-3
Quant0.05.flux	5% quantile of the flux over the entire campaign	nmol m-2 s-1
Quant0.95.flux	95% quantile of the flux over the entire campaign	nmol m-2 s-1
seflxugm2h	Standard error of the flux over the entire campaign	µg m-2 h-1
meanVd	mean deposition velocity over the entire campaign	cm s-1
Quant0.05.Vd	5% quantile of the deposition velocity over the entire campaign	cm s-1
Quant0.95.Vd	95% quantile of the deposition velocity over the entire campaign	cm s-1
summed fluxes ug m-2 h-1	fluxes of all emitted and deposted VOC summed up (emission and deposition separated)	µg m-2 h-1
% flux in mass	percentage of each ion ot the summed up flux (emission and deposition separated)	%
summed fluxes nmol m-2 s-1	fluxes of all emitted and deposted VOC summed up (emission and deposition separated)	nmol m-2 s-1
% flux in moles	percentage of each ion ot the summed up flux (emission and deposition separated)	%
flux > LODf	a boolean indicating whether the flux is larger than 3*LODf	-

## Sheet: table post-calibrated emissions
Ion mass measured	Exact Ion Mass	uncertaintymasses	Raw.formula	Tentative.identification	Chemical.class	meanMixingRatio	meanflux	lod_flux	meanfluxugm2h	List if correlated masses (m/z)	likelycommingfromFarm	meanMixingRatio_in_microg_m3	Quant0.05.MixingRatio	Quant0.95.MixingRatio	Quant0.05.flux	Quant0.95.flux	seflxugm2h	meanVd	Quant0.05.Vd	Quant0.95.Vd	summed fluxes ug m-2 h-1	% flux in mass	summed fluxes nmol m-2 s-1	% flux in moles	flux > LODf
g mol-1	g mol-1	g mol-1	-	-	-	ppb	nmol m-2 s-1	nmol m-2 s-1	µg m-2 h-1		-	µg m-3	µg m-3	µg m-3	nmol m-2 s-1	nmol m-2 s-1	µg m-2 h-1	cm s-1	cm s-1	cm s-1	µg m-2 h-1	%	nmol m-2 s-1	%	-
33.033	33.0333	0.00471904	CH4O	Methanol	Oxygen containing compounds	3.42427	0.526745	0.00532383	62.6398		FALSE	5.04974	1.65976	6.22578	-0.316512	2.31703	4.05671	-0.130169	-0.647838	0.108852	62.6398	0.362308	0.526745	0.516931	TRUE
47.049	47.0493	0.00672133	C2H6O	Ethanol (can also be dimethyl ether)	Oxygen containing compounds	1.6781	0.239578	0.0122538	40.5789		FALSE	3.52468	0.359803	3.46704	-0.346347	1.31788	4.15623	-0.128464	-0.789291	0.245856	103.219	0.597015	0.766323	0.752046	TRUE
93.033	93.0333	0.0132905	C6H4O	furan	Oxygen containing compounds	1.65583	0.0909619	0.00124519	30.4648		FALSE	6.87707	0.853009	2.83922	-0.0192438	0.336151	1.47638	0.0923963	-0.922126	1.25824	133.684	0.773223	0.857284	0.841313	TRUE
45.033	45.0343	0.00643347	C2H4O	Acetaldehyde	Oxygen containing compounds	0.352981	0.0594247	0.000857716	9.63387		FALSE	0.709633	0.0892154	0.767747	-0.0246107	0.284352	0.589746	-0.157506	-0.685756	0.112498	143.317	0.828945	0.916709	0.89963	TRUE
59.049	59.0493	0.00843561	C3H6O	Acetone	Oxygen containing compounds	0.701719	0.0426996	0.00072437	9.07694		FALSE	1.84981	0.27412	1.43243	-0.00634386	0.124002	0.320384	0.0201767	-0.388608	0.445594	152.394	0.881446	0.959409	0.941534	TRUE
63.026	63.0263	0.00900375	C2H6S	DMS	Sulfur containing compounds	0.0529423	0.0128817	0.000257121	2.92277		FALSE	0.148962	0.0128176	0.140333	-0.00148542	0.0428514	0.154379	0.0918168	-0.374159	0.769337	155.317	0.898351	0.972291	0.954176	TRUE
95.049	95.0493	0.0135785	C6H6O	Phenol	Oxygen containing compounds	0.111864	0.00923948	0.000598595	3.16153		FALSE	0.474668	-0.118415	0.3635	-0.0197415	0.0540539	0.2784	0.0253638	-0.383839	0.44883	158.479	0.916638	0.98153	0.963244	TRUE
111.08	111.08	0.0158702	C7H10O2	Furan, 2-ethyl-5-methyl-	Oxygen containing compounds	0.0485227	0.00677988	0.000258597	2.71119		FALSE	0.240621	0.00202355	0.109776	-0.00564275	0.0283392	0.180236	0.0566374	-0.593763	0.728677	161.19	0.932319	0.98831	0.969897	TRUE
113.015	113.023	0.0161462	C5H4O3		Oxygen containing compounds	0.050731	0.00624983	0.000210605	2.54277		FALSE	0.255954	0.0192766	0.0994849	-0.00483001	0.0273812	0.164959	-0.0910914	-0.396053	0.106937	163.733	0.947026	0.99456	0.97603	TRUE
167.07	167.07	0.0238672	C9H10O3		Oxygen containing compounds	0.0717517	0.00312751	0.000233987	1.88105		FALSE	0.535159	0.0332285	0.119411	-0.00790044	0.0196019	0.184289	-0.0053264	-0.472445	0.5494	165.614	0.957906	0.997687	0.9791	TRUE
113.06	113.059	0.0161513	C6H8O2	detected by Park et al 2013	Oxygen containing	0.0162024	0.00305265	0.000147513	1.24248		FALSE	0.0817787	-0.00106361	0.0396047	-0.0035203	0.014302	0.0839935	0.0137084	-0.430045	0.427747	166.856	0.965093	1.00074	0.982095	TRUE
59.086	59.0853	0.00844075	C4H10	Isobutane Butane	Hydrocarbons	0.0478259	0.00265201	0.00027639	0.564107		FALSE	0.126154	0.0208516	0.0829552	-0.00933109	0.0166935	0.0634534	0.0591915	-0.246363	0.418155	167.42	0.968356	1.00339	0.984698	TRUE
91.058	91.0493	0.013007	C2H6N2O2		Nitrogen containing	0.0755783	0.00216251	0.000286125	0.708889		FALSE	0.307232	0.0133804	0.15326	-0.0115672	0.0221114	0.117993	0.190836	-0.552734	1.27086	168.129	0.972456	1.00555	0.98682	TRUE
91.058	91.0543	0.0130078	C7H6 C4H10S C2H6N2O2		Hydrocarbons	0.0755783	0.00216251	0.000286125	0.708889		FALSE	0.307232	0.0133804	0.15326	-0.0115672	0.0221114	0.117993	0.190836	-0.552734	1.27086	168.838	0.976556	1.00772	0.988943	TRUE
73.065	73.0653	0.0104379	C4H8O	1 propene 2 methoxy 2-butanone Butanone/Butal	Oxygen containing compounds	0.0793769	0.0020071	0.000225475	0.527936		FALSE	0.258914	0.0292419	0.154693	-0.00878498	0.0179212	0.0751727	-0.0233873	-0.201416	0.116847	169.366	0.97961	1.00972	0.990912	TRUE
112.052	112.051	-0.001	C4H5N3O	https://webbook.nist.gov/cgi/cbook.cgi?Formula=C4H5N3O&NoIon=on&Units=SI		0.00880071	0.00151	9.98319e-05	0.609113		FALSE	0.044024	0.00189888	0.0197983	-0.0031678	0.00843326	0.057191	-0.169742	-0.985896	0.388134	169.975	0.983133	1.01123	0.992394	TRUE
87.08	87.0803	0.01244	C5H10O	Butal-3-methyl Allyl ethyl ether Pentanone Pental Pental Pentanone Methyl butenol MBO (methyl butenol) trÅ s reactif avec OH	Oxygen containing compounds	0.0120811	0.00139051	0.000110706	0.435909		FALSE	0.0469651	0.00332915	0.0258008	-0.00325018	0.00768657	0.043384	-0.0523767	-0.480255	0.318846	170.411	0.985654	1.01262	0.993759	TRUE
114.091	114.091	0.0162988	C6H11NO		Nitrogen containing compounds	0.019374	0.00114193	0.000163465	0.469021		FALSE	0.0986785	0.00367578	0.0350858	-0.00638023	0.0100426	0.0713128	-0.0499487	-0.454644	0.2833	170.88	0.988367	1.01377	0.994879	TRUE
68.049	68.0493	0.00972133	C4H5N	Pyrrole	Nitrogen containing compounds	0.00736891	0.000861192	0.000101954	0.210972		FALSE	0.022386	0.00262962	0.0135678	-0.0033757	0.00674732	0.026562	-0.0923859	-0.786588	0.559921	171.091	0.989587	1.01463	0.995725	TRUE
49.011	49.0103	0.00700147	CH4S	Methanethiol	Sulfur containing compounds	0.0249639	0.000775938	0.000127359	0.136906		FALSE	0.0546208	0.00642958	0.0670935	-0.00625526	0.00855385	0.029297	0.204253	-0.603041	1.0977	171.228	0.990379	1.0154	0.996486	TRUE
199.148	199.169	0.0284528	C12H22O2		Oxygen containing compounds	0.00509059	0.000432126	5.4928e-05	0.309805		FALSE	0.0452581	0.000930407	0.0222734	-0.00205085	0.00379873	0.0655655	-0.0485517	-0.797883	0.615322	171.538	0.992171	1.01584	0.99691	TRUE
199.148	199.147	0.0284496	C15H18			0.00509059	0.000432126	5.4928e-05	0.309805		FALSE	0.0452581	0.000930407	0.0222734	-0.00205085	0.00379873	0.0655655	-0.0485517	-0.797883	0.615322	171.847	0.993963	1.01627	0.997334	TRUE
115.075	115.075	0.0164393	C6H10O2	hexenoic acid	Oxygen containing compounds	0.00595449	0.000396908	7.38756e-05	0.164427		FALSE	0.0305899	0.00161378	0.0136228	-0.00257777	0.00404415	0.0341204	0.0765587	-0.685107	0.883263	172.012	0.994914	1.01666	0.997724	TRUE
65.02	65.0223	0.0092889	CH4O3		Oxygen containing	0.00655912	0.000389104	8.32275e-05	0.0910782		FALSE	0.019039	0.00337679	0.0119668	-0.0034646	0.00507561	0.0222146	-0.0758658	-0.77124	0.522985	172.103	0.995441	1.01705	0.998106	TRUE
65.02	65.0193	0.00928847	C2H2F2			0.00655912	0.000389104	8.32275e-05	0.0910782		FALSE	0.019039	0.00337679	0.0119668	-0.0034646	0.00507561	0.0222146	-0.0758658	-0.77124	0.522985	172.194	0.995967	1.01744	0.998487	TRUE
112.007						0.00234067	0.000315118	4.17323e-05	0.127063		FALSE	0.0117041	0.000661993	0.00528331	-0.00143022	0.00268793	0.021056	-0.0990075	-0.902514	0.649296	172.321	0.996702	1.01776	0.998797	TRUE
129.07	129.07	0.0184386	C10H8	phtalene	Hydrocarbons	0.00578403	0.000302363	7.3175e-05	0.140494		FALSE	0.0333279	0.00197639	0.0121532	-0.00314577	0.00423562	0.0401628	0.0429246	-0.660374	0.8549	172.462	0.997515	1.01806	0.999093	TRUE
122.06	122.059	0.017437	C7H7NO		Nitrogen containing	0.00540642	0.000288112	8.71469e-05	0.126601		FALSE	0.0294602	0.00201968	0.0109057	-0.00364663	0.00461331	0.0398652	-0.0337192	-0.761765	0.720495	172.588	0.998247	1.01835	0.999376	TRUE
155.107						0.00425894	0.000275121	8.27824e-05	0.153624		FALSE	0.0294907	0.000704446	0.00997277	-0.00383712	0.00450148	0.0510868	-0.0986302	-1.38412	0.925499	172.742	0.999136	1.01862	0.999646	TRUE
115.112	115.111	0.0164445	C7H14O	Heptal	Oxygen containing compounds	0.00252536	0.000182167	3.96806e-05	0.0754906		FALSE	0.0129776	0.000945529	0.00535553	-0.00146783	0.00232771	0.0188359	-0.0216245	-0.430848	0.355898	172.817	0.999572	1.01881	0.999825	TRUE
115.123						0.0027272	0.000177749	4.62948e-05	0.0736666		FALSE	0.0140162	0.00119073	0.00533327	-0.00168593	0.00237388	0.0193237	0.0158449	-0.629903	0.659732	172.891	0.999998	1.01898	0.999999	TRUE
103.123						0.000608422	7.31458e-07	4.42212e-06	0.000271549		TRUE	0.002801	0.000103668	0.00141375	0	0	0.00154255	0.0450582	-0.590869	0.7473	172.891	1	1.01898	1	FALSE

## Sheet: table post-calibrated dep
Ion mass measured	Exact Ion Mass	uncertaintymasses	Raw.formula	Tentative.identification	Chemical.class	meanMixingRatio	meanflux	lod_flux	meanfluxugm2h	List if correlated masses (m/z)	likelycommingfromFarm	meanMixingRatio_in_microg_m3	Quant0.05.MixingRatio	Quant0.95.MixingRatio	Quant0.05.flux	Quant0.95.flux	seflxugm2h	meanVd	Quant0.05.Vd	Quant0.95.Vd	summed fluxes ug m-2 h-1	% flux in mass	summed fluxes nmol m-2 s-1	% flux in moles	flux > LODf
g mol-1	g mol-1	g mol-1	-	-	-	ppb	nmol m-2 s-1	nmol m-2 s-1	µg m-2 h-1		-	µg m-3	µg m-3	µg m-3	nmol m-2 s-1	nmol m-2 s-1	µg m-2 h-1	cm s-1	cm s-1	cm s-1	µg m-2 h-1	%	nmol m-2 s-1	%	-
31.018	31.0183	0.00443118	CH2O	Formaldehyde	Oxygen containing compounds	2.94969	-0.154223	0.010252	-17.2212		FALSE	4.08453	1.11238	5.08469	-0.838724	0.347363	1.47583	0.0454176	-0.112711	0.257604	-17.2212	0.157678	-0.154223	0.30472	FALSE
47.013	47.0123	0.00671604	CH2O2	Formic acid	Oxygen containing compounds	0.268609	-0.0797271	0.00144475	-13.4936		FALSE	0.563755	0.000863985	0.742936	-0.296458	0.0179301	0.736237	0.313316	-0.170377	1.05362	-30.7148	0.281225	-0.23395	0.462248	FALSE
43.018	43.0183	0.00614547	C2H2O	fragments	Oxygen containing compounds	0.51498	-0.0553321	0.00118861	-8.56899		FALSE	0.988991	0.0491412	1.24228	-0.210379	0.0610433	0.460464	0.134753	-0.116566	0.490145	-39.2838	0.359683	-0.289282	0.571575	FALSE
75.044	75.0443	0.0107206	C3H6O2	hydroxyacetone propanoic acid	Oxygen containing compounds	0.515262	-0.0497546	0.00106805	-13.4416		FALSE	1.72622	0.002506	1.20297	-0.19907	0.0155595	0.676301	-0.108581	-0.643949	0.314681	-52.7254	0.482754	-0.339036	0.669882	FALSE
61.028	61.0283	0.00871833	C2H4O2	Acetic acid	Oxygen containing compounds	0.22624	-0.0320338	0.000702926	-7.03785		TRUE	0.616382	-0.00717364	0.548999	-0.134536	0.0249655	0.396014	0.184248	-0.190742	0.760924	-59.7632	0.547193	-0.37107	0.733176	FALSE
83.049	83.0493	0.0118642	C5H6O	Methylfuran, MBO	Oxygen containing compounds	0.0415557	-0.0163412	0.000245085	-4.88564		FALSE	0.15407	0.00881437	0.0883556	-0.0912045	0.00625635	0.360924	-0.0379935	-0.66027	0.549695	-64.6489	0.591926	-0.387411	0.765464	FALSE
101.06	101.059	0.014437	C5H8O2	Pentanoic acid	Oxygen containing compounds	0.0191527	-0.00893085	0.00015269	-3.24919		FALSE	0.0864094	0.00306521	0.0494968	-0.0559448	0.00613135	0.283076	0.268829	-0.588345	1.67227	-67.8981	0.621675	-0.396342	0.78311	FALSE
31.029	31.0283	0.00443261		resolution issue on 31.018	Nitrogen containing																-67.8981	0.621675	-0.396342	0.78311	FALSE
41.039	41.0383	0.00586261	C3H4	Propyne	Hydrocarbons	0.349766	-0.00694422	0.000918077	-1.02594		FALSE	0.640807	0.0726858	0.694429	-0.102713	0.0504663	0.243816	0.0765374	-0.704641	0.948408	-68.924	0.631069	-0.403286	0.79683	FALSE
83.086	83.0853	0.0118693	C6H10			0.0908114	-0.00680062	0.000391437	-2.03413		FALSE	0.336837	0.00914291	0.190306	-0.0486711	0.013883	0.211176	0.0120492	-0.553795	0.569348	-70.9581	0.649693	-0.410087	0.810267	FALSE
46.021	46.0287	0.0077	CH3NO	Formamide		0.055318	-0.00611753	0.000528769	-1.01353		FALSE	0.113651	0.00180043	0.130811	-0.0386457	0.0173424	0.100838	0.136495	-0.492754	0.966242	-71.9717	0.658973	-0.416205	0.822355	FALSE
69.07	69.0703	0.00986718	C5H8	Isoprene	Hydrocarbons	0.166953	-0.00531548	0.000579858	-1.3217		FALSE	0.514798	0.0180707	0.396914	-0.0617157	0.0252241	0.239455	-0.169742	-0.985896	0.388134	-73.2934	0.671075	-0.42152	0.832857	FALSE
75.068				resolution issue on75.044																	-73.2934	0.671075	-0.42152	0.832857	FALSE
137.132	137.132	0.0195903	C10H16	Monoterpenes	Hydrocarbons	0.172672	-0.00522234	0.00032696	-2.57814		TRUE	1.05709	0.0354407	0.420085	-0.0646553	0.0394904	0.546886	0.136495	-0.492754	0.966242	-75.8715	0.69468	-0.426742	0.843176	FALSE
95.086	95.0853	0.0135836	C7H10	Norbornene	Hydrocarbons	0.0694451	-0.00434694	0.000383757	-1.488		FALSE	0.294788	-0.014655	0.165424	-0.0357297	0.014777	0.198487	0.0115328	-0.687657	0.812254	-77.3595	0.708304	-0.431089	0.851764	FALSE
111.117	111.117	0	C8H14	https://webbook.nist.gov/cgi/cbook.cgi?Formula=C8H14&NoIon=on&Units=SI	Hydrocarbons	0.0508453	-0.00415945	0.000278922	-1.66387		FALSE	0.252222	0.00396562	0.11078	-0.0317677	0.00837369	0.185946	0.0674439	-0.412749	0.673742	-79.0234	0.723539	-0.435249	0.859983	FALSE
97.101	97.1013	0.0138716	C7H12	methyl cyclohexene heptadiene	Hydrocarbons	0.0724343	-0.00403902	0.000343121	-1.41189		FALSE	0.313993	0.00452332	0.164206	-0.0350123	0.0125364	0.188493	-0.0522834	-0.333552	0.216985	-80.4353	0.736466	-0.439288	0.867963	FALSE
71.049	71.0493	0.0101499	C4H6O	MVK+MACR	Oxygen containing compounds	0.057065	-0.00304846	0.000260928	-0.779723		FALSE	0.181	0.0108059	0.147742	-0.0201078	0.00958445	0.091117	0.0120444	-0.185895	0.24476	-81.215	0.743605	-0.442336	0.873987	FALSE
109.101	109.101	0	C8H12	https://webbook.nist.gov/cgi/cbook.cgi?Formula=C8H12&NoIon=on&Units=SI	Hydrocarbons	0.0765481	-0.00289349	0.000327616	-1.13646		FALSE	0.372834	0.00863085	0.149102	-0.0255243	0.0124949	0.17949	-0.000235681	-0.82299	0.797462	-82.3515	0.754011	-0.44523	0.879704	FALSE
111.104	111.117	0.0158739	C8H14	https://webbook.nist.gov/cgi/cbook.cgi?Formula=C8H14&NoIon=on&Units=SI	Hydrocarbons	0.0514123	-0.00286307	0.000284042	-1.14516		FALSE	0.255005	0.00344129	0.10936	-0.0261732	0.00968967	0.171993	0.0183289	-0.653645	0.729623	-83.4966	0.764496	-0.448093	0.885361	FALSE
125.12	125.132	0.017876	C9H16	https://webbook.nist.gov/cgi/cbook.cgi?Formula=C9H16&NoIon=on&Units=SI	Hydrocarbons	0.0257865	-0.0026416	0.000199027	-1.18986		FALSE	0.144036	0.00162575	0.0537761	-0.0201549	0.006742	0.136308	0	0	0	-84.6865	0.77539	-0.450734	0.89058	FALSE
109.089	109.101	0.0155859	C8H12	https://webbook.nist.gov/cgi/cbook.cgi?Formula=C8H12&NoIon=on&Units=SI	Hydrocarbons	0.0751766	-0.00245656	0.000318926	-0.964741		FALSE	0.366113	0.00918334	0.143419	-0.0266866	0.0130664	0.169966	0.0271323	-0.228696	0.308814	-85.6512	0.784223	-0.453191	0.895434	FALSE
99.117	99.1168	-0.0002	C7H14	https://webbook.nist.gov/cgi/cbook.cgi?Formula=C7H14&NoIon=on&Units=SI	Hydrocarbons	0.0210267	-0.00243476	0.000197274	-0.868775		FALSE	0.0930405	0.00150453	0.0532141	-0.0206576	0.00656703	0.104877	0.064689	-0.604631	0.749055	-86.52	0.792178	-0.455626	0.900245	FALSE
187.148	187.168	0.0267383	C11H22O2		Oxygen containing compounds	0.00356235	-0.00198711	5.33817e-05	-1.33878		TRUE	0.0297628	0.00126806	0.00933855	-0.011807	0.000774218	0.111248	-0.0819272	-1.27112	1.10125	-87.8588	0.804436	-0.457613	0.904171	FALSE
187.148	187.148	0.0267355	C14H18		Hydrocarbons	0.00356235	-0.00198711	5.33817e-05	-1.33878		TRUE	0.0297628	0.00126806	0.00933855	-0.011807	0.000774218	0.111248	-0.0819272	-1.27112	1.10125	-89.1975	0.816694	-0.4596	0.908097	FALSE
125.107	125.132	0.025	C9H16	https://webbook.nist.gov/cgi/cbook.cgi?Formula=C9H16&NoIon=on&Units=SI		0.0229081	-0.00193697	0.000186038	-0.872381		FALSE	0.127945	0.0016806	0.0471826	-0.015758	0.00645835	0.118965	0.0924472	-0.669297	0.924861	-90.0699	0.824681	-0.461537	0.911924	FALSE
81.07	81.0703	0.0115815	C6H8	hexadiene cyclique - fragment monoterpenes	Hydrocarbons	0.12103	-0.00192367	0.000418496	-0.561428		FALSE	0.438033	0.0268349	0.280374	-0.0272222	0.020946	0.169252	0.0121528	-0.233849	0.254628	-90.6314	0.829822	-0.463461	0.915725	FALSE
99.104	99.1173	0.0141596	C7H14	Cycloheptane Cyclohexane methyl- Cyclopentane 1 2-dimethyl- cis-	Hydrocarbons	0.0228091	-0.00183197	0.000200958	-0.6536		FALSE	0.100914	0.000731438	0.0578714	-0.0176391	0.00704917	0.0960693	0.0701011	-0.757153	0.74191	-91.285	0.835806	-0.465293	0.919345	FALSE
203.154	203.153	0.0290219	C13H18N2		Nitrogen containing	0.00490851	-0.00181761	6.25596e-05	-1.32932		FALSE	0.0445171	0.00205168	0.0108274	-0.0109605	0.00136662	0.106094	0.245383	-0.370361	1.17646	-92.6143	0.847977	-0.46711	0.922936	FALSE
203.154	203.179	0.0290256	C15H22		Hydrocarbons																-92.6143	0.847977	-0.46711	0.922936	FALSE
61.065	61.0643	0.00872347	C3H8O	propanol	Oxygen containing	0.0151879	-0.0016751	0.000170945	-0.368245		TRUE	0.0414041	0.00192492	0.0337882	-0.0121867	0.00568181	0.046607	0.27361	-0.357588	1.37	-92.9825	0.851349	-0.468785	0.926246	FALSE
109.076						0.0597315	-0.0016608	0.000284449	-0.65215		FALSE	0.29086	0.00781397	0.115967	-0.0203197	0.0120125	0.13646	0.0281012	-0.244149	0.334893	-93.6347	0.85732	-0.470446	0.929527	FALSE
35.005	35.0043	0.00500061	H3P			0.0410796	-0.00160837	0.000421385	-0.202684		FALSE	0.064196	0.0286064	0.0558687	-0.0252072	0.0176248	0.0604682	0.0201767	-0.388608	0.445594	-93.8374	0.859176	-0.472054	0.932705	FALSE
35.005	35.0013	0.00500018	O218		Oxygen containing	0.0410796	-0.00160837	0.000421385	-0.202684		FALSE	0.064196	0.0286064	0.0558687	-0.0252072	0.0176248	0.0604682	0.0201767	-0.388608	0.445594	-94.04	0.861032	-0.473663	0.935883	FALSE
101.096	101.095	0.0144422	C6H12O	3-Pentanone 2-methyl- Methyl Isobutyl Ketone Hexal Hexanone Hexal 2-Hexen-1-ol (E)-	Oxygen containing compounds	0.00542479	-0.0015969	6.44712e-05	-0.581184		FALSE	0.0244832	0.00144086	0.0119879	-0.0114477	0.00213358	0.0596074	0.162519	-0.596626	1.15021	-94.6212	0.866353	-0.47526	0.939038	FALSE
133.101	133.101	0.0190145	C10H12	Benzene 4-ethenyl-1 2-dimethyl- (or position isomer) Benzene (2-methyl-1-propenyl)-	Hydrocarbons	0.00593063	-0.00134553	6.37504e-05	-0.64473		FALSE	0.0352399	0.00227919	0.0124538	-0.00790051	0.00171177	0.0557083	0.0268295	-0.541646	0.648562	-95.266	0.872256	-0.476605	0.941697	FALSE
123.092	123.091	0.0175845	C7H10N2		Nitrogen containing																-95.266	0.872256	-0.476605	0.941697	FALSE
123.092	123.08	0.0175829	C8H10O	Phenol ethyl	Oxygen containing compounds	0.0409644	-0.00131899	0.000246559	-0.584485		FALSE	0.225107	0.00501605	0.0810078	-0.0162469	0.0110502	0.136073	0.0239181	-0.332434	0.423829	-95.8504	0.877608	-0.477924	0.944303	FALSE
99.092	99.1033	0.0141576	C6H12N		Nitrogen containing	0.0216173	-0.00123893	0.000188084	-0.441964		FALSE	0.0956297	0.000288615	0.0542049	-0.0127453	0.00676771	0.078238	0.0292329	-0.776001	0.701627	-96.2924	0.881654	-0.479163	0.946751	FALSE
139.148	139.155	0.0198793	C10H18		Hydrocarbons	0.0139153	-0.00122986	0.000186634	-0.616079		FALSE	0.0864415	0.00181513	0.0274631	-0.0103677	0.00453085	0.0843835	-0.130169	-0.647838	0.108852	-96.9085	0.887295	-0.480393	0.949181	FALSE
125.096	125.106	0.0178723	C7H12N2		Nitrogen containing	0.0164573	-0.00122073	0.000156572	-0.54975		FALSE	0.0919083	0.000956555	0.0334577	-0.0137921	0.00579825	0.0970981	0.0357968	-0.666772	0.767548	-97.4582	0.892329	-0.481614	0.951593	FALSE
201.139	201.138	0.028734	C13H16N2		Nitrogen containing	0.00327518	-0.00119037	5.58507e-05	-0.861948		TRUE	0.0294092	0.000913209	0.00876821	-0.00744818	0.00125588	0.0769687	0.00415248	-0.814065	0.7961	-98.3202	0.900221	-0.482804	0.953945	FALSE
201.139	201.164	0.0287378	C15H20		Hydrocarbons																-98.3202	0.900221	-0.482804	0.953945	FALSE
83.01	83.0123	0.0118589	C4H2O2		Oxygen containing	0.00577987	-0.00117495	7.44543e-05	-0.351118		FALSE	0.0214191	0.00286018	0.0100052	-0.00773736	0.00221597	0.0328042	0.149417	-0.376597	0.865902	-98.6713	0.903435	-0.483979	0.956266	FALSE
83.01	83.0093	0.0118585	C2HF3			0.00577987	-0.00117495	7.44543e-05	-0.351118		FALSE	0.0214191	0.00286018	0.0100052	-0.00773736	0.00221597	0.0328042	0.149417	-0.376597	0.865902	-99.0224	0.90665	-0.485154	0.958588	FALSE
189.164	189.164	0.0270235	C14H20		Hydrocarbons	0.00314403	-0.0010934	4.68982e-05	-0.744596		FALSE	0.0265507	0.00129719	0.00711265	-0.00669114	0.00128443	0.0737345	0.190836	-0.552734	1.27086	-99.767	0.913468	-0.486247	0.960748	FALSE
133.065	133.065	0.0190093	C9H8O		Oxygen containing compounds	0.00499562	-0.00106877	6.01399e-05	-0.511976		FALSE	0.029676	0.0018194	0.0102935	-0.006209	0.00169174	0.0437964	0.153873	-0.418317	0.908971	-100.279	0.918155	-0.487316	0.96286	FALSE
113.107						0.0128891	-0.000889051	0.000145422	-0.362008		FALSE	0.0650826	0.00173109	0.0270725	-0.0095706	0.00586807	0.0728116	0.0196961	-0.611999	0.62142	-100.641	0.92147	-0.488205	0.964617	FALSE
205.157						0.00960963	-0.000821864	9.98893e-05	-0.607		FALSE	0.0880126	0.00269099	0.0188705	-0.0095809	0.00467013	0.112439	0.0293242	-0.577535	0.638932	-101.248	0.927028	-0.489027	0.96624	FALSE
149.096	149.096	0.0212995	C10H12O	mâ€šthyl chavicol (estragole)	Oxygen containing compounds	0.00882307	-0.000800631	0.00019827	-0.429735		FALSE	0.058727	0.00113902	0.018395	-0.00681371	0.00402009	0.0675063	0.102131	-0.4831	0.874062	-101.678	0.930962	-0.489828	0.967822	FALSE
149.096	149.081	0.0212973	C6H12O4		Oxygen containing compounds																-101.678	0.930962	-0.489828	0.967822	FALSE
107.086	107.085	0.0152979	C8H10	ethylbenzene + xylene		0.0698804	-0.000786148	0.000210954	-0.303068		FALSE	0.334072	0.0159527	0.213286	-0.010631	0.00858823	0.0916221	0.0192165	-0.161469	0.228608	-101.981	0.933737	-0.490614	0.969376	FALSE
53.026						0.0180561	-0.000779046	0.000164716	-0.148715		FALSE	0.0427431	0.00395716	0.0443413	-0.00950727	0.00699899	0.0365629	0.162519	-0.596626	1.15021	-102.13	0.935099	-0.491393	0.970915	FALSE
121.101	121.101	0.0173002	C9H12	Benzene propyl- Mesitylene 5 Benzene -trimethyl- isomers 2 Benzene ethylmethyl isomers	Hydrocarbons	0.0269552	-0.000674602	0.000138464	-0.294102		FALSE	0.145728	0.00722195	0.0761565	-0.00841246	0.00537137	0.0650327	0.0852496	-0.205894	0.443303	-102.424	0.937792	-0.492068	0.972248	FALSE
121.101	121.086	0.017298	C5H12O3		Oxygen containing compounds																-102.424	0.937792	-0.492068	0.972248	FALSE
163.136	163.148	0.0233069	C12H18		Hydrocarbons	0.00618769	-0.000667553	8.75568e-05	-0.392047		FALSE	0.045064	0.00163709	0.012081	-0.00648004	0.00348486	0.0654924	0.00245436	-1.64613	1.45956	-102.816	0.941381	-0.492735	0.973567	FALSE
105.07						0.0178557	-0.0006671	0.000134613	-0.252332		FALSE	0.0837545	0.00673235	0.0392368	-0.00916342	0.00613101	0.0631516	0.0477391	-0.384609	0.606806	-103.068	0.943692	-0.493402	0.974885	FALSE
119.06	119.07	0.01701	C5H10O3		Oxygen containing compounds	0.00886099	-0.000666427	8.64585e-05	-0.285641		FALSE	0.0470977	0.00227172	0.0184876	-0.00636404	0.00321192	0.0470693	0.11325	-0.503401	0.905513	-103.354	0.946307	-0.494069	0.976202	FALSE
119.06	119.049	0.017007	C8H6O		Oxygen containing compounds	0.00886099	-0.000666427	8.64585e-05	-0.285641		FALSE	0.0470977	0.00227172	0.0184876	-0.00636404	0.00321192	0.0470693	0.11325	-0.503401	0.905513	-103.639	0.948922	-0.494735	0.977518	FALSE
163.123	163.133	0.0233048	C8H18O3		Oxygen containing compounds	0.00596279	-0.000585747	8.68917e-05	-0.343976		FALSE	0.0434227	0.00143837	0.0119205	-0.00628897	0.00328468	0.0630507	0.0924472	-0.669297	0.924861	-103.983	0.952072	-0.495321	0.978676	FALSE
163.123	163.144	0.0233063	C7H18N2O2		Nitrogen containing compounds																-103.983	0.952072	-0.495321	0.978676	FALSE
153.151	153.164	0.0218806	C11H20		Hydrocarbons	0.0116488	-0.00057859	0.000106125	-0.319002		TRUE	0.0796438	0.00222062	0.0256142	-0.00711506	0.00470401	0.0740362	-0.0923859	-0.786588	0.559921	-104.302	0.954992	-0.495899	0.979819	FALSE
163.148						0.00454478	-0.00057395	6.62925e-05	-0.3371		FALSE	0.0331014	0.00112087	0.00868905	-0.00514903	0.00245731	0.050463	0.0166728	-0.867135	0.927175	-104.639	0.958079	-0.496473	0.980953	FALSE
62.995						0.0125294	-0.000509077	0.000144581	-0.11545		FALSE	0.0352361	0.00435302	0.0239159	-0.0079387	0.00646749	0.0402706	-0.0123449	-0.628847	0.559443	-104.755	0.959136	-0.496982	0.981959	FALSE
161.132	161.132	0.0230189	C12H16		Hydrocarbons	0.00291302	-0.000497953	4.9338e-05	-0.28885		FALSE	0.0209545	0.000903983	0.00578711	-0.00392666	0.00193619	0.0389811	-0.0683961	-0.899839	0.693618	-105.044	0.961781	-0.49748	0.982943	FALSE
98.975	98.9743	0.0141392	H2O4S		Oxygen containing	0.00552668	-0.000489147	7.17301e-05	-0.174288		FALSE	0.0244198	0.00335451	0.0112894	-0.00423243	0.00260775	0.0280928	-0.0564391	-0.722058	0.528086	-105.218	0.963377	-0.49797	0.983909	FALSE
102.068						0.00312165	-0.000482522	4.72866e-05	-0.1773		FALSE	0.0142241	0.000904519	0.00677585	-0.00388802	0.00138345	0.0269331	0.0919643	-0.489073	0.862219	-105.395	0.965	-0.498452	0.984863	FALSE
127.112	127.111	0.0181588	C8H14O	1-Octen-3-one/6-methyl-5-hepten-2-one	Oxygen containing compounds	0.00947043	-0.000478756	0.000120363	-0.21908		FALSE	0.0537413	0.00138814	0.0199451	-0.00737441	0.00523583	0.0663097	0.0265901	-0.914342	0.983509	-105.614	0.967006	-0.498931	0.985809	FALSE
117.091	117.101	0.0167288	C5H12N2O		Nitrogen containing	0.00447125	-0.000439617	7.20948e-05	-0.185311		FALSE	0.0233725	0.000298233	0.0104329	-0.00480591	0.00306172	0.0394978	-0.0464303	-1.13728	0.984137	-105.8	0.968702	-0.49937	0.986677	FALSE
183.08	183.079	0.0261542	C13H10O		Oxygen containing	0.00368825	-0.000424007	5.68979e-05	-0.279458		FALSE	0.0301449	0.00149546	0.00756359	-0.00422005	0.00209474	0.0471339	0.0127142	-0.709256	0.734691	-106.079	0.971261	-0.499794	0.987515	FALSE
183.08	183.101	0.0261573	C10H14O3		Oxygen containing compounds																-106.079	0.971261	-0.499794	0.987515	FALSE
110.109						0.00999654	-0.000422322	0.000108362	-0.167405		FALSE	0.0491388	0.00338853	0.0182309	-0.00645939	0.00395223	0.0461296	0.0269019	-0.445869	0.477673	-106.246	0.972794	-0.500217	0.988349	FALSE
117.078	117.091	0.0167273	C6H12O2	Butanoic acid ethyl ester Acetic acid butyl ester Methyl valerate Propanoic acid propyl ester Hexanoic acid Isobutyl acetate 1-Butanol-3-methyl- formate	Oxygen containing compounds	0.00476613	-0.000411676	7.38156e-05	-0.173514		FALSE	0.0249111	0.000539324	0.0107443	-0.00475539	0.00294307	0.0369259	0.0765374	-0.704641	0.948408	-106.42	0.974383	-0.500628	0.989163	FALSE
175.148	175.148	0.0250212	C13H18		Hydrocarbons	0.00215394	-0.000399473	3.4817e-05	-0.251881		FALSE	0.0168419	0.000874305	0.00436524	-0.00316806	0.00102538	0.0319635	0.313316	-0.170377	1.05362	-106.672	0.976689	-0.501028	0.989952	FALSE
117.07	117.054	0.016722	C5H8O3		Oxygen containing compounds	0.00458357	-0.000364087	7.14683e-05	-0.153445		FALSE	0.0239553	0.000643031	0.0102975	-0.00402584	0.00271427	0.0340107	0.0758021	-0.720293	0.916012	-106.825	0.978094	-0.501392	0.990671	FALSE
117.07	117.069	0.0167242	C9H8			0.00458357	-0.000364087	7.14683e-05	-0.153445		FALSE	0.0239553	0.000643031	0.0102975	-0.00402584	0.00271427	0.0340107	0.0758021	-0.720293	0.916012	-106.979	0.979499	-0.501756	0.991391	FALSE
145.122	145.101	0.0207288	C11H12		Hydrocarbons																-106.979	0.979499	-0.501756	0.991391	FALSE
145.122	145.122	0.0207318	C8H16O2	Pentanoic acid 4-methyl- ethyl ester Decal Butanoic acid butyl ester Hexanoic acid ethyl ester Octanoic acid Acetic acid hexyl ester	Oxygen containing compounds	0.00277746	-0.000357966	4.70684e-05	-0.187016		FALSE	0.0179942	0.000435839	0.00630111	-0.00404436	0.00230156	0.0357757	-0.0283081	-0.745024	0.60385	-107.166	0.981211	-0.502114	0.992098	FALSE
197.132	197.132	0.0281618	C15H16		Hydrocarbons	0.00305724	-0.000357792	4.90005e-05	-0.253916		FALSE	0.0269053	0.00114797	0.00709555	-0.0034727	0.00176037	0.0452936	0.0450582	-0.590869	0.7473	-107.42	0.983536	-0.502472	0.992805	FALSE
197.132	197.153	0.0281648	C12H20O2		Oxygen containing compounds																-107.42	0.983536	-0.502472	0.992805	FALSE
117.102						0.00398867	-0.000357011	6.74499e-05	-0.150504		TRUE	0.0208518	9.97347e-05	0.00937829	-0.00424018	0.00274614	0.0331529	0.0981982	-0.652616	0.951137	-107.57	0.984914	-0.502829	0.99351	FALSE
86.096	86.0963	0.0122995	C5H11N	Piperidine	Nitrogen containing compounds	0.00485487	-0.000288063	8.54496e-05	-0.0892839		FALSE	0.01866	0.00149634	0.010523	-0.00507216	0.00352418	0.0307758	-0.00438965	-0.765266	0.682194	-107.66	0.985731	-0.503117	0.99408	FALSE
112.112	112.112	0.016016	C7H13N		Nitrogen containing compounds	0.0063247	-0.000286058	8.91792e-05	-0.115454		FALSE	0.0316551	0.00154958	0.0118838	-0.0056485	0.00415869	0.043017	0.0385941	-0.666709	0.829294	-107.775	0.986789	-0.503403	0.994645	FALSE
131.107	131.106	0.0187295	C7H14O2	Hexanoic acid methyl ester Butanoic acid propyl ester Butanoic acid 3-methyl- ethyl ester Propanoic acid butyl ester Isopentyl acetate	Oxygen containing compounds	0.00273439	-0.000256008	4.69048e-05	-0.120832		FALSE	0.0160044	0.000953891	0.00574639	-0.00294195	0.0017079	0.0246232	0.0981518	-0.606829	0.86068	-107.896	0.987895	-0.503659	0.995151	FALSE
103.075	103.074	0.0147249	C5H10O2	Pentanoic acid	acid	0.00577556	-0.000231465	8.1758e-05	-0.0858899		TRUE	0.0265766	0.000762897	0.0128222	-0.00449589	0.00329734	0.0324965	0.000275445	-0.0303861	0.0328527	-107.982	0.988681	-0.50389	0.995608	FALSE
135.08	135.079	0.019297	C9H10O		Oxygen containing	0.0142924	-0.000223062	8.14386e-05	-0.108472		TRUE	0.0861883	0.00236462	0.0450953	-0.00490678	0.00379184	0.0480902	0.0375313	-0.371242	0.502576	-108.09	0.989674	-0.504113	0.996049	FALSE
211.148	211.132	0.0301618	C12H18O3		Oxygen containing																-108.09	0.989674	-0.504113	0.996049	FALSE
211.148	211.148	0.030164	C16H18		Hydrocarbons	0.00194509	-0.000222008	3.75167e-05	-0.168756		FALSE	0.0183349	0.000618713	0.00462619	-0.00250461	0.00106197	0.0323716	0.03829	-0.241907	0.361711	-108.259	0.99122	-0.504335	0.996487	FALSE
211.148	211.169	0.030167	C13H22O2		Oxygen containing compounds	0.00194509	-0.000222008	3.75167e-05	-0.168756		FALSE	0.0183349	0.000618713	0.00462619	-0.00250461	0.00106197	0.0323716	0.03829	-0.241907	0.361711	-108.428	0.992765	-0.504557	0.996926	FALSE
181.17	181.195	0.025885	C13H24		Hydrocarbons	0.00327448	-0.000211349	6.34589e-05	-0.137845		FALSE	0.0264838	0.000518584	0.00615004	-0.0035045	0.00263874	0.0448489	0.0399021	-0.850491	0.976403	-108.566	0.994027	-0.504769	0.997344	FALSE
84.081	84.0803	0.0120115	C5H9N		Nitrogen containing compounds	0.00476119	-0.000197749	5.57315e-05	-0.0598569		FALSE	0.0178717	0.00145757	0.00837783	-0.00320832	0.00206824	0.0178463	0.0412302	-0.460736	0.565603	-108.625	0.994575	-0.504967	0.997734	FALSE
131.06	131.059	0.0187228	C8H6N2		Nitrogen containing	0.00287954	-0.000195241	4.76517e-05	-0.0921177		FALSE	0.0168479	0.00109529	0.0058245	-0.00273537	0.00184324	0.0255129	0.0281012	-0.244149	0.334893	-108.717	0.995418	-0.505162	0.99812	FALSE
131.06	131.07	0.0187243	C6H10O3		Oxygen containing compounds																-108.717	0.995418	-0.505162	0.99812	FALSE
153.127	153.127	0.0218753	C10H16O	Thujone (or stereoisomers) camphor + Methyl salicylate	Oxygen containing compounds	0.00823861	-0.000177072	5.25591e-05	-0.0976123		TRUE	0.0563194	0.00181882	0.0187724	-0.00453223	0.00320019	0.0482321	0.0722912	-0.610991	0.864	-108.815	0.996312	-0.505339	0.99847	FALSE
204.187						0.00124768	-0.000162793	1.66361e-05	-0.119664		FALSE	0.0113732	0.00050882	0.00252005	-0.00147533	0.000397698	0.0175887	0.14816	-0.339334	0.756612	-108.935	0.997408	-0.505502	0.998792	FALSE
106.078						0.0042209	-0.000153301	4.46446e-05	-0.0585426		FALSE	0.0199886	0.00185969	0.0100383	-0.00243539	0.00173564	0.0180646	0.0243445	-0.54042	0.605846	-108.993	0.997944	-0.505655	0.999095	FALSE
201.233						0.00103779	-0.000148795	1.66289e-05	-0.107793		FALSE	0.0093231	0.000189968	0.00264747	-0.0014612	0.000327657	0.0188964	-0.0111999	-0.627626	0.603471	-109.101	0.998931	-0.505804	0.999388	FALSE
89.096	89.0953	0.0127279	C5H12O	pentanol or methyl butanol	Oxygen containing	0.00396952	-7.66114e-05	5.92305e-05	-0.0245728		TRUE	0.0157887	0.000711227	0.00866665	-0.00283754	0.00271452	0.0212222	0.0446339	-0.773459	1.02143	-109.126	0.999156	-0.50588	0.99954	FALSE
120.081	120.08	0.0171543	C8H9N		Nitrogen containing	0.00182825	-7.53191e-05	2.00723e-05	-0.0325598		FALSE	0.0098008	0.000698217	0.00407105	-0.00110312	0.000636411	0.00934722	0.0233573	-0.373525	0.490881	-109.158	0.999454	-0.505956	0.999689	FALSE
120.081	120.088	0.0171555	C9H1013C																		-109.158	0.999454	-0.505956	0.999689	FALSE
102.025						0.00139545	-6.44367e-05	1.87764e-05	-0.023667		FALSE	0.00635584	0.000713082	0.00260676	-0.000934542	0.000545259	0.00679183	-0.0758658	-0.77124	0.522985	-109.182	0.99967	-0.50602	0.999816	FALSE
53.939						0.00155753	-4.03778e-05	1.14615e-05	-0.00784058		FALSE	0.00375052	0.000529367	0.00239673	-0.000702164	0.00039448	0.00253539	0.00765821	-0.163387	0.265794	-109.19	0.999742	-0.506061	0.999896	FALSE
174.14						0.000862606	-3.48463e-05	7.43992e-06	-0.0218453		FALSE	0.00670599	0.000415425	0.0015157	-0.000420505	0.000135182	0.00573922	0.153873	-0.418317	0.908971	-109.212	0.999942	-0.506095	0.999965	FALSE
103.112	103.111	0.0147302	C6H14O	hexanol	Oxygen containing	0.00162422	-1.12333e-05	2.15726e-05	-0.00416983		TRUE	0.00747661	0.000426742	0.0035121	-0.00098321	0.000673242	0.00807399	0.0160198	-0.264501	0.380491	-109.216	0.99998	-0.506107	0.999987	FALSE
103.112	103.122	0.0147318	C5H14N2		Nitrogen containing																-109.216	0.99998	-0.506107	0.999987	FALSE
89.042	89.0413	0.0127202	C4H8S		Sulfur containing	0.0160123	-6.66601e-06	0.000144026	-0.0021368		TRUE	0.0636504	0.00310787	0.035412	-0.00857107	0.00938583	0.063954	-0.00114244	-0.453667	0.408633	-109.218	1	-0.506113	1	FALSE

## Sheet: Summed fluxes
	summed fluxes	sd summed fluxes	summed fluxes	sd summed fluxes	summed fluxes	sd summed fluxes	n
	µg m-2 h-1	µg m-2 h-1	nmol m-2 s-1	nmol m-2 s-1	g ha-1 day-1	g ha-1 day-1
emission	172.891	6.05231	1.01898	0.035671	41.4939	1.45255	32
deposition	-109.218	2.17947	-0.506113	0.0100996	-26.2123	0.523073	91
net flux	63.6734	6.43277	0.512871	0.0518141	15.2816	1.54386	123

## Sheet: Correlation at EN=130
Pearson correlation > 0.9
Mass1	Mass2	MassDifference	MassSum	CorrelationType	intercept	slope	corr	resolution
31.018	31.029	0.011	62.047	Resolution	-0.156301	0.748813	0.990492	0.015509
33.033	33.045	0.012	66.078	Resolution	-0.03606	0.74866	0.993371	0.0165165
41.002	41.039	0.037	82.041	Unkwnown	-0.862094	90.1621	0.910517	0.020501
41.002	44.062	3.06	85.064	Unkwnown	0.00295304	1.24031	0.809557	0.020501
41.039	44.062	3.023	85.101	Isotope-3	0.0152801	0.013434	0.877803	0.0205195
31.018	45.033	14.015	76.051	CH2	-1.12133	1.93116	0.888531	0.015509
31.029	45.033	14.004	76.062	CH2	-0.698947	2.55544	0.890664	0.0155145
33.033	45.033	12	78.066	C	0.371739	0.34648	0.897928	0.0165165
33.045	45.033	11.988	78.078	C	0.394691	0.459924	0.895871	0.0165225
43.018	45.033	2.015	88.051	Isotope-2	0.931036	0.291628	0.821844	0.021509
47.037	47.049	0.012	94.086	Resolution	-0.0445932	0.865239	0.867356	0.0235185
47.037	47.06	0.023	94.097	Resolution	-0.0404058	0.743854	0.859895	0.0235185
47.049	47.06	0.011	94.109	Resolution	-0.00268344	0.86485	0.998803	0.0235245
53.939	54.947	1.008	108.886	Isotope-1	2.45e-05	0.924644	0.887413	0.0269695
31.018	57.033	26.015	88.051	C2H2	-0.194465	0.268092	0.805505	0.015509
31.029	57.033	26.004	88.062	C2H2	-0.137291	0.356541	0.809523	0.0155145
33.045	57.033	23.988	90.078	Unkwnown	0.0161792	0.063764	0.802795	0.0165225
43.018	57.033	14.015	100.051	CH2	0.0817976	0.04591	0.903607	0.021509
45.033	57.033	12	102.066	C	-0.0267418	0.13019	0.843955	0.0225165
47.013	57.033	10.02	104.046	Unkwnown	-0.0933691	0.410943	0.812756	0.0235065
31.018	59.049	28.031	90.067	Unkwnown	-2.06662	3.2332	0.802201	0.015509
31.029	59.049	28.02	90.078	C2H4	-1.3936	4.32002	0.81688	0.0155145
45.033	59.049	14.016	104.082	CH2	0.105082	1.46342	0.823518	0.0225165
43.018	61.028	18.01	104.046	H2O	-0.571937	0.798178	0.927173	0.021509
61.028	61.065	0.037	122.093	Resolution	0.0191458	0.0371482	0.922313	0.030514
63.026	65.02	1.994	128.046	Isotope-2	0.0101841	0.0615614	0.868617	0.031513
41.039	68.049	27.01	109.088	Unkwnown	0.00399528	0.0121127	0.819421	0.0205195
57.07	68.049	10.979	125.119	Unkwnown	-0.00255394	0.0253132	0.843901	0.028535
41.002	69.033	28.031	110.035	Unkwnown	-0.0248628	3.21813	0.836295	0.020501
41.039	69.033	27.994	110.072	C2H4	0.0079275	0.0343	0.892064	0.0205195
44.062	69.033	24.971	113.095	Unkwnown	-0.0182926	2.18521	0.870278	0.022031
68.049	69.033	0.984	137.082	Isotope-1	0.00940232	2.23864	0.873316	0.0340245
41.039	69.07	28.031	110.109	Unkwnown	0.176021	0.31834	0.805643	0.0205195
57.07	69.07	12	126.14	C	-0.0571283	0.729324	0.928381	0.028535
68.049	69.07	1.021	137.119	Isotope-1	0.114966	24.2434	0.91747	0.0340245
69.033	69.07	0.037	138.103	Resolution	0.143164	8.57503	0.831085	0.0345165
43.018	71.049	28.031	114.067	C2H4	0.0654059	0.0662514	0.8943	0.021509
57.033	71.049	14.016	128.082	CH2	-0.0308162	1.30235	0.939635	0.0285165
57.07	71.086	14.016	128.156	CH2	0.0365801	0.455878	0.926686	0.028535
69.07	71.086	2.016	140.156	Isotope-2	0.134758	0.527111	0.849637	0.034535
75.044	75.068	0.024	150.112	Resolution	-0.0144474	0.107497	0.945912	0.037522
77.06	78.046	0.986	155.106	Isotope-1	-0.00110608	0.258783	0.827545	0.03853
53.026	79.054	26.028	132.08	C2H2	0.00795476	3.883	0.895575	0.026513
53.026	80.049	27.023	133.075	Unkwnown	0.00187461	0.364872	0.861766	0.026513
54.046	80.049	26.003	134.095	C2H2	0.005623	1.34164	0.817731	0.027023
79.054	80.049	0.995	159.103	Isotope-1	0.0010587	0.0943594	0.967168	0.039527
81.07	82.078	1.008	163.148	Isotope-1	0.00928923	0.072695	0.989308	0.040535
57.07	83	25.93	140.07	Unkwnown	0.00635683	0.562656	0.848143	0.028535
68.049	83	14.951	151.049	Unkwnown	0.155778	17.9308	0.809424	0.0340245
69.07	83	13.93	152.07	Unkwnown	0.0752216	0.732599	0.872372	0.034535
71.086	83	11.914	154.086	Unkwnown	0.00534735	1.14049	0.844368	0.035543
43.018	83.01	39.992	126.028	Unkwnown	0.0113681	0.00222844	0.841319	0.021509
45.033	83.01	37.977	128.043	Unkwnown	0.00600749	0.00638533	0.80242	0.0225165
57.033	83.01	25.977	140.043	C2H2	0.00796665	0.0448695	0.877543	0.0285165
71.049	83.01	11.961	154.059	C	0.00956454	0.0313191	0.856106	0.0355245
82.989	83.01	0.021	165.999	Resolution	-0.00921646	2.84709	0.82103	0.0414945
43.018	83.049	40.031	126.067	Unkwnown	0.0962436	0.02455	0.8488	0.021509
57.033	83.049	26.016	140.082	C2H2	0.0602865	0.48454	0.881628	0.0285165
71.049	83.049	12	154.098	C	0.0756312	0.349377	0.887235	0.0355245
83.01	83.049	0.039	166.059	Resolution	-0.0177998	10.2665	0.956897	0.041505
57.07	83.086	26.016	140.156	C2H2	-0.0523222	0.478953	0.863772	0.028535
69.07	83.086	14.016	152.156	CH2	0.0154261	0.609302	0.872131	0.034535
71.086	83.086	12	154.172	C	-0.0457159	0.954975	0.847509	0.035543
83	83.086	0.086	166.086	Unkwnown	-0.0328013	0.805271	0.960566	0.0415
53.939	83.911	29.972	137.85	Unkwnown	-3.18e-05	0.767947	0.926617	0.0269695
54.947	83.911	28.964	138.858	Unkwnown	-4.17e-05	0.735274	0.924245	0.0274735
57.07	84.081	27.011	141.151	Unkwnown	-0.00179483	0.0393423	0.884332	0.028535
68.049	84.081	16.032	152.13	Unkwnown	0.00836362	1.26719	0.853314	0.0340245
69.07	84.081	15.011	153.151	Unkwnown	0.00379	0.0500183	0.888749	0.034535
71.086	84.081	12.995	155.167	Unkwnown	4.11e-05	0.0756973	0.838294	0.035543
83	84.081	1.081	167.081	Unkwnown	0.000944647	0.0640525	0.970522	0.0415
83.086	84.081	0.995	167.167	Isotope-1	0.00502169	0.0759077	0.966719	0.041543
44.062	85.065	41.003	129.127	Unkwnown	-0.00839167	2.66822	0.832465	0.022031
69.033	85.065	16.032	154.098	Unkwnown	0.0201387	1.11363	0.872621	0.0345165
83.01	85.065	2.055	168.075	Isotope-2	0.027916	3.78255	0.861134	0.041505
83.049	85.065	2.016	168.114	Isotope-2	0.0362236	0.355516	0.87008	0.0415245
57.07	85.101	28.031	142.171	C2H4	0.0119096	0.29236	0.903821	0.028535
69.07	85.101	16.031	154.171	Unkwnown	0.0789794	0.331601	0.814164	0.034535
71.086	85.101	14.015	156.187	CH2	-0.0161929	0.651172	0.990573	0.035543
83	85.101	2.101	168.101	Unkwnown	0.0815201	0.38518	0.813985	0.0415
83.086	85.101	2.015	168.187	Isotope-2	0.100166	0.471005	0.838997	0.041543
84.081	85.101	1.02	169.182	Isotope-1	0.079137	5.92111	0.817838	0.0420405
86.036	86.06	0.024	172.096	Resolution	0.000982526	1.3533	0.979654	0.043018
57.07	86.096	29.026	143.166	Unkwnown	0.00169323	0.0209136	0.912205	0.028535
69.07	86.096	17.026	155.166	Unkwnown	0.00620341	0.0241717	0.834915	0.034535
71.086	86.096	15.01	157.182	Unkwnown	0.000226396	0.0454268	0.977128	0.035543
83	86.096	3.096	169.096	Unkwnown	0.00621541	0.0283966	0.84695	0.0415
83.086	86.096	3.01	169.182	Isotope-3	0.00819944	0.0332154	0.835471	0.041543
84.081	86.096	2.015	170.177	Isotope-2	0.00611949	0.434285	0.847209	0.0420405
85.101	86.096	0.995	171.197	Isotope-1	0.00169477	0.0685953	0.970153	0.0425505
31.029	87.044	56.015	118.073	Unkwnown	-0.0134904	0.109837	0.802899	0.0155145
43.018	87.044	44.026	130.062	Unkwnown	0.054446	0.0138654	0.860244	0.021509
45.033	87.044	42.011	132.077	Unkwnown	0.0196565	0.040758	0.854464	0.0225165
57.033	87.044	30.011	144.077	Unkwnown	0.0336345	0.276908	0.902853	0.0285165
71.049	87.044	15.995	158.093	Unkwnown	0.0444257	0.187847	0.853778	0.0355245
83.01	87.044	4.034	170.054	Isotope-4	-0.00417246	5.41028	0.903897	0.041505
83.049	87.044	3.995	170.093	Isotope-4	0.0087795	0.500606	0.897299	0.0415245
85.065	87.044	1.979	172.109	Isotope-2	-0.0260185	1.21598	0.892074	0.0425325
86.036	87.044	1.008	173.08	Isotope-1	-0.00287702	6.92167	0.862339	0.043018
86.06	87.044	0.984	173.104	Isotope-1	-0.0047382	4.92308	0.847276	0.04303
45.033	87.08	42.047	132.113	Unkwnown	9.81e-05	0.0241477	0.851584	0.0225165
59.049	87.08	28.031	146.129	C2H4	0.00874862	0.0116674	0.804203	0.0295245
73.065	87.08	14.015	160.145	CH2	0.00251889	0.130021	0.872103	0.0365325
43.018	89.023	46.005	132.041	Unkwnown	0.00853327	0.0057931	0.912281	0.021509
61.028	89.023	27.995	150.051	C2H4	0.0133154	0.00635829	0.939706	0.030514
61.065	89.023	27.958	150.088	C2H4	0.0100348	0.17124	0.887137	0.0305325
61.028	89.042	28.014	150.07	C2H4	0.0259049	0.0299088	0.90576	0.030514
61.065	89.042	27.977	150.107	C2H4	0.0112067	0.789272	0.924258	0.0305325
89.023	89.042	0.019	178.065	Resolution	-0.0250314	4.04581	0.939926	0.0445115
61.028	89.06	28.032	150.088	C2H4	0.0259824	0.0370936	0.88698	0.030514
61.065	89.06	27.995	150.125	C2H4	0.00768985	0.980278	0.920407	0.0305325
89.023	89.06	0.037	178.083	Resolution	-0.0352502	4.90858	0.917819	0.0445115
89.042	89.06	0.018	178.102	Resolution	-0.00614536	1.24022	0.997498	0.044521
61.028	89.096	28.068	150.124	Unkwnown	0.00445989	0.00783848	0.874114	0.030514
61.065	89.096	28.031	150.161	C2H4	0.000434747	0.21068	0.927919	0.0305325
89.023	89.096	0.073	178.119	Unkwnown	-0.00874577	1.05224	0.90445	0.0445115
89.042	89.096	0.054	178.138	Resolution	-0.00250257	0.265776	0.989858	0.044521
89.06	89.096	0.036	178.156	Resolution	-0.00120902	0.214747	0.99533	0.04453
61.028	90.055	29.027	151.083	Unkwnown	0.000353688	0.00200383	0.858349	0.030514
61.065	90.055	28.99	151.12	Unkwnown	-0.000755519	0.0556329	0.856549	0.0305325
89.023	90.055	1.032	179.078	Isotope-1	-0.00354415	0.298358	0.882415	0.0445115
89.042	90.055	1.013	179.097	Isotope-1	-0.00152733	0.0701	0.906073	0.044521
89.06	90.055	0.995	179.115	Isotope-1	-0.0011446	0.055842	0.899122	0.04453
89.096	90.055	0.959	179.151	Isotope-1	-0.000832696	0.260285	0.89641	0.044548
77.06	91.039	13.979	168.099	CH2	-0.0382685	5.27055	0.853884	0.03853
77.06	91.05	13.99	168.11	CH2	-0.0445581	6.20239	0.849184	0.03853
91.039	91.05	0.011	182.089	Resolution	-0.000301366	1.18204	0.999381	0.0455195
77.06	91.058	13.998	168.118	CH2	-0.0471799	6.46615	0.848843	0.03853
91.039	91.058	0.019	182.097	Resolution	-0.000986809	1.23194	0.998901	0.0455195
91.05	91.058	0.008	182.108	Resolution	-0.000714846	1.04246	0.999766	0.045525
91.039	92.062	1.023	183.101	Isotope-1	0.000192111	0.139719	0.886232	0.0455195
91.05	92.062	1.012	183.112	Isotope-1	0.000355329	0.117474	0.880728	0.045525
91.058	92.062	1.004	183.12	Isotope-1	0.000547866	0.112074	0.876024	0.045529
75.044	93.033	17.989	168.077	H2O	0.194257	1.18841	0.830951	0.037522
75.068	93.033	17.965	168.101	H2O	0.451019	10.6662	0.836468	0.037534
77.06	93.033	15.973	170.093	Unkwnown	-0.929549	113.991	0.810459	0.03853
91.05	93.033	1.983	184.083	Isotope-2	0.480451	15.0065	0.800106	0.045525
91.058	93.033	1.975	184.091	Isotope-2	0.479459	14.4573	0.803689	0.045529
77.06	93.07	16.01	170.13	Unkwnown	-0.390256	42.0278	0.906961	0.03853
91.039	93.07	2.031	184.109	Isotope-2	0.120461	6.59036	0.882129	0.0455195
91.05	93.07	2.02	184.12	Isotope-2	0.127641	5.54404	0.877627	0.045525
91.058	93.07	2.012	184.128	Isotope-2	0.131901	5.31573	0.877356	0.045529
93.033	93.07	0.037	186.103	Resolution	0.16748	0.299582	0.902066	0.0465165
75.044	94.041	18.997	169.085	Unkwnown	0.0249399	0.0879901	0.828994	0.037522
75.068	94.041	18.973	169.109	Unkwnown	0.043347	0.792146	0.84396	0.037534
77.06	94.041	16.981	171.101	Unkwnown	-0.0617129	8.53708	0.829828	0.03853
91.05	94.041	2.991	185.091	Isotope-3	0.0444516	1.12066	0.800106	0.045525
91.058	94.041	2.983	185.099	Isotope-3	0.0444872	1.07904	0.803098	0.045529
93.033	94.041	1.008	187.074	Isotope-1	0.01284	0.0733061	0.995362	0.0465165
93.07	94.041	0.971	187.111	Isotope-1	0.0181769	0.202568	0.917705	0.046535
75.044	95.049	20.005	170.093	Unkwnown	0.0938321	0.148138	0.861002	0.037522
75.068	95.049	19.981	170.117	Unkwnown	0.121887	1.3454	0.887245	0.037534
77.06	95.049	17.989	172.109	H2O	-0.0593143	14.5776	0.878314	0.03853
91.039	95.049	4.01	186.088	Isotope-4	0.125802	2.23224	0.836077	0.0455195
91.05	95.049	3.999	186.099	Isotope-4	0.127558	1.8817	0.833509	0.045525
91.058	95.049	3.991	186.107	Isotope-4	0.127903	1.81026	0.835887	0.045529
93.033	95.049	2.016	188.082	Isotope-2	0.100787	0.114633	0.967619	0.0465165
93.07	95.049	1.979	188.119	Isotope-2	0.0937684	0.330739	0.929202	0.046535
94.041	95.049	1.008	189.09	Isotope-1	0.0777117	1.57619	0.977162	0.0470205
68.049	95.086	27.037	163.135	Unkwnown	0.0292252	15.3344	0.834034	0.0340245
69.07	95.086	26.016	164.156	C2H2	0.00120227	0.562432	0.810411	0.034535
81.07	95.086	14.016	176.156	CH2	0.20156	0.386072	0.847056	0.040535
82.078	95.086	13.008	177.164	Unkwnown	0.140748	5.60444	0.885846	0.041039
57.07	96.057	38.987	153.127	Unkwnown	-0.00261699	0.0349061	0.810321	0.028535
68.049	96.057	28.008	164.106	C2H4	0.00521353	1.17914	0.819443	0.0340245
69.07	96.057	26.987	165.127	Unkwnown	0.00201233	0.0448891	0.823443	0.034535
75.068	96.057	20.989	171.125	Unkwnown	0.0134406	0.0689606	0.826687	0.037534
77.06	96.057	18.997	173.117	Unkwnown	0.00201126	0.807614	0.885332	0.03853
91.039	96.057	5.018	187.096	Unkwnown	0.0124362	0.122529	0.827249	0.0455195
91.05	96.057	5.007	187.107	Unkwnown	0.0126672	0.102519	0.818132	0.045525
91.058	96.057	4.999	187.115	Unkwnown	0.0127527	0.0982605	0.817405	0.045529
93.033	96.057	3.024	189.09	Isotope-3	0.0139884	0.00535194	0.824567	0.0465165
93.07	96.057	2.987	189.127	Isotope-3	0.01177	0.0171611	0.878332	0.046535
94.041	96.057	2.016	190.098	Isotope-2	0.0126022	0.074871	0.847059	0.0470205
95.049	96.057	1.008	191.106	Isotope-1	0.00724164	0.0511503	0.932804	0.0475245
95.086	96.057	0.971	191.143	Isotope-1	0.00625409	0.0677589	0.879386	0.047543
69.033	97.04	28.007	166.073	C2H4	0.00100715	1.00277	0.870189	0.0345165
73.065	97.04	23.975	170.105	Unkwnown	0.0267812	0.133184	0.805979	0.0365325
87.08	97.04	9.96	184.12	Unkwnown	0.0265366	0.95526	0.858604	0.04354
57.07	97.065	39.995	154.135	Unkwnown	-0.00277331	0.125183	0.882185	0.028535
68.049	97.065	29.016	165.114	Unkwnown	0.0233178	4.32106	0.907869	0.0340245
69.033	97.065	28.032	166.098	C2H4	0.0233173	1.61554	0.871385	0.0345165
69.07	97.065	27.995	166.135	C2H4	0.00900195	0.168553	0.93454	0.034535
83	97.065	14.065	180.065	Unkwnown	0.0212296	0.175625	0.846249	0.0415
83.086	97.065	13.979	180.151	CH2	0.0350431	0.201609	0.819044	0.041543
84.081	97.065	12.984	181.146	Unkwnown	0.0183471	2.75008	0.862253	0.0420405
95.086	97.065	1.979	192.151	Isotope-2	0.0387104	0.216131	0.846603	0.047543
96.057	97.065	1.008	193.122	Isotope-1	0.0320873	2.75478	0.83492	0.0480285
57.07	97.101	40.031	154.171	Unkwnown	-0.0464039	0.401464	0.899364	0.028535
69.07	97.101	28.031	166.171	C2H4	0.0220866	0.492372	0.87614	0.034535
71.086	97.101	26.015	168.187	C2H2	-0.0611839	0.843618	0.92951	0.035543
83	97.101	14.101	180.101	Unkwnown	0.0441003	0.538297	0.826055	0.0415
83.086	97.101	14.015	180.187	CH2	0.0588883	0.686138	0.885516	0.041543
84.081	97.101	13.02	181.182	Unkwnown	0.032279	8.5128	0.848094	0.0420405
85.101	97.101	12	182.202	C	-0.041402	1.29966	0.940152	0.0425505
86.096	97.101	11.005	183.197	Unkwnown	-0.04318	17.5436	0.894076	0.043048
96.057	97.101	1.044	193.158	Isotope-1	0.0702347	8.67671	0.83561	0.0480285
97.065	97.101	0.036	194.166	Resolution	0.036847	2.56872	0.821968	0.0485325
71.086	99.092	28.006	170.178	C2H4	-0.0302281	0.278772	0.803823	0.035543
83	99.092	16.092	182.092	Unkwnown	-0.0111262	0.206804	0.820439	0.0415
83.086	99.092	16.006	182.178	Unkwnown	0.00249117	0.243957	0.81325	0.041543
84.081	99.092	15.011	183.173	Unkwnown	-0.0105606	3.12736	0.818095	0.0420405
85.101	99.092	13.991	184.193	CH2	-0.0227515	0.426234	0.807602	0.0425505
86.096	99.092	12.996	185.188	Unkwnown	-0.0307058	6.09456	0.818003	0.043048
99.08	99.09	0.01	198.17	Resolution	0.02	1.19	0.97	0.05
57.07	99.104	42.034	156.174	Unkwnown	-0.0233208	0.140903	0.819151	0.028535
71.086	99.104	28.018	170.19	C2H4	-0.0347462	0.309334	0.883766	0.035543
83	99.104	16.104	182.104	Unkwnown	-0.00415968	0.212164	0.836322	0.0415
83.086	99.104	16.018	182.19	Unkwnown	0.0076293	0.255679	0.847707	0.041543
84.081	99.104	15.023	183.185	Unkwnown	-0.00447785	3.23358	0.838392	0.0420405
85.101	99.104	14.003	184.205	CH2	-0.0279381	0.478086	0.897709	0.0425505
86.096	99.104	13.008	185.2	Unkwnown	-0.0334915	6.68016	0.887995	0.043048
97.101	99.104	2.003	196.205	Isotope-2	5.45e-05	0.32988	0.855101	0.0485505
99.08	99.1	0.02	198.18	Resolution	0.03	1.11	0.9	0.05
99.09	99.1	0.01	198.2	Resolution	0.01	0.99	0.98	0.05
57.07	99.117	42.047	156.187	Unkwnown	-0.0178048	0.129583	0.850308	0.028535
71.086	99.117	28.031	170.203	C2H4	-0.0320803	0.292484	0.943946	0.035543
83	99.117	16.117	182.117	Unkwnown	0.00567229	0.184324	0.823445	0.0415
83.086	99.117	16.031	182.203	Unkwnown	0.0142262	0.226308	0.851132	0.041543
84.081	99.117	15.036	183.198	Unkwnown	0.00511867	2.81704	0.825038	0.0420405
85.101	99.117	14.016	184.218	CH2	-0.0263019	0.454313	0.963806	0.0425505
86.096	99.117	13.021	185.213	Unkwnown	-0.028721	6.21576	0.932731	0.043048
97.101	99.117	2.016	196.218	Isotope-2	0.00021418	0.313728	0.918513	0.0485505
99.09	99.12	0.03	198.21	Resolution	0.02	0.81	0.91	0.05
99.104	99.117	0.013	198.221	Resolution	0.0100076	0.862275	0.974332	0.049552
57.033	101.06	44.027	158.093	Unkwnown	0.0165408	0.35697	0.885666	0.0285165
71.049	101.06	30.011	172.109	Unkwnown	0.0293238	0.248753	0.865309	0.0355245
83.01	101.06	18.05	184.07	H2O	-0.0324526	6.99165	0.89223	0.041505
83.049	101.06	18.011	184.109	H2O	-0.0191792	0.672513	0.920883	0.0415245
87.044	101.06	14.016	188.104	CH2	-0.0132047	1.11133	0.846907	0.043522
43.018	101.096	58.078	144.114	Unkwnown	0.0178949	0.00533574	0.843182	0.021509
57.033	101.096	44.063	158.129	Unkwnown	0.00906571	0.111852	0.903947	0.0285165
71.049	101.096	30.047	172.145	Unkwnown	0.0131279	0.0776118	0.876895	0.0355245
83.01	101.096	18.086	184.106	Unkwnown	-0.00704403	2.24156	0.928994	0.041505
83.049	101.096	18.047	184.145	H2O	-0.00255128	0.213859	0.950952	0.0415245
85.065	101.096	16.031	186.161	Unkwnown	-0.0117412	0.452191	0.821867	0.0425325
87.044	101.096	14.052	188.14	CH2	-0.00156486	0.365333	0.905062	0.043522
101.06	101.1	0.04	202.16	Resolution	0	0.3	0.97	0.05
83.049	102.025	18.976	185.074	Unkwnown	-0.00234116	0.0289479	0.835909	0.0415245
87.044	102.025	14.981	189.069	Unkwnown	-0.00226682	0.0502243	0.807245	0.043522
101.06	102.03	0.97	203.09	Isotope-1	0	0.04	0.9	0.05
101.1	102.03	0.93	203.12	Isotope-1	0	0.14	0.88	0.05
102.068	102.104	0.036	204.172	Resolution	-0.00441091	1.04593	0.925243	0.051034
102.104	102.128	0.024	204.232	Resolution	-0.000497318	0.177929	0.803343	0.051052
43.018	103.032	60.014	146.05	Unkwnown	0.00829726	0.00188889	0.82732	0.021509
45.033	103.032	57.999	148.065	Unkwnown	0.003225	0.00579088	0.803736	0.0225165
57.033	103.032	45.999	160.065	Unkwnown	0.00523759	0.0391713	0.839683	0.0285165
83.01	103.032	20.022	186.042	Unkwnown	-0.000245518	0.774379	0.848267	0.041505
83.049	103.032	19.983	186.081	Unkwnown	0.00171308	0.0708786	0.835139	0.0415245
85.065	103.032	17.967	188.097	H2O	-0.00342491	0.174668	0.839645	0.0425325
87.044	103.032	15.988	190.076	Unkwnown	0.00125801	0.131294	0.861139	0.043522
101.1	103.03	1.94	204.13	Isotope-2	0	0.31	0.81	0.05
97.04	103.042	6.002	200.082	Unkwnown	-0.000316741	0.274355	0.819247	0.04852
103.032	103.042	0.01	206.074	Resolution	0.000437265	1.36054	0.937354	0.051516
103.042	103.075	0.033	206.117	Resolution	-0.00527739	1.51245	0.884917	0.051521
103.075	103.112	0.037	206.187	Resolution	-0.0040434	0.33445	0.962282	0.0515375
54.046	104.047	50.001	158.093	Unkwnown	-0.0007163	0.54318	0.872875	0.027023
54.046	104.049	50.003	158.095	Unkwnown	-0.000651157	0.553533	0.874361	0.027023
104.047	104.049	0.002	208.096	Resolution	9.12e-05	1.01602	0.99865	0.0520235
54.046	104.062	50.016	158.108	Unkwnown	-0.00065044	0.558373	0.881254	0.027023
104.047	104.062	0.015	208.109	Resolution	0.000165227	1.00857	0.990221	0.0520235
104.049	104.062	0.013	208.111	Resolution	6.98e-05	0.993805	0.992696	0.0520245
53.026	105.057	52.031	158.083	Unkwnown	0.0261889	1.35824	0.805457	0.026513
79.054	105.057	26.003	184.111	C2H2	0.0253753	0.338488	0.871986	0.039527
80.049	105.057	25.008	185.106	Unkwnown	0.0270736	3.27304	0.821753	0.0400245
105.037	105.057	0.02	210.094	Resolution	-0.00499785	0.997027	0.930261	0.0525185
53.026	105.07	52.044	158.096	Unkwnown	0.00835301	1.17912	0.803424	0.026513
79.054	105.07	26.016	184.124	C2H2	0.00601876	0.303195	0.894685	0.039527
80.049	105.07	25.021	185.119	Unkwnown	0.00723456	2.94924	0.850594	0.0400245
105.037	105.07	0.033	210.107	Resolution	-0.00851705	0.751653	0.804369	0.0525185
105.057	105.07	0.013	210.127	Resolution	-0.0119329	0.839078	0.962202	0.0525285
79.054	106.078	27.024	185.132	Unkwnown	-0.00276407	0.0576235	0.882623	0.039527
80.049	106.078	26.029	186.127	C2H2	-0.00268364	0.569126	0.850691	0.0400245
105.057	106.078	1.021	211.135	Isotope-1	-0.0049355	0.144762	0.859971	0.0525285
105.07	106.078	1.008	211.148	Isotope-1	-0.00320376	0.178084	0.924065	0.052535
53.026	107.049	54.023	160.075	Unkwnown	-0.0498615	2.76171	0.829309	0.026513
79.054	107.049	27.995	186.103	C2H4	-0.0518179	0.689981	0.901892	0.039527
80.049	107.049	27	187.098	Unkwnown	-0.0536065	6.97198	0.891374	0.0400245
105.07	107.049	1.979	212.119	Isotope-2	-0.037971	1.80749	0.804245	0.052535
106.078	107.049	0.971	213.127	Isotope-1	-0.00383243	9.92671	0.851114	0.053039
53.026	107.086	54.06	160.112	Unkwnown	-0.181114	6.87932	0.814227	0.026513
79.054	107.086	28.032	186.14	C2H4	-0.179254	1.68006	0.871725	0.039527
80.049	107.086	27.037	187.135	Unkwnown	-0.178389	16.6779	0.845165	0.0400245
106.078	107.086	1.008	213.164	Isotope-1	-0.0663291	24.7095	0.840232	0.053039
107.049	107.086	0.037	214.135	Resolution	-0.0573214	2.49697	0.979218	0.0535245
79.054	108.057	29.003	187.111	Unkwnown	0.00120813	0.100472	0.838283	0.039527
80.049	108.057	28.008	188.106	C2H4	-3.48e-05	1.07139	0.869679	0.0400245
81.07	108.057	26.987	189.127	Unkwnown	0.0068911	0.0288179	0.834155	0.040535
82.078	108.057	25.979	190.135	C2H2	0.00285165	0.405554	0.848135	0.041039
92.062	108.057	15.995	200.119	Unkwnown	0.00270369	0.763995	0.826212	0.046031
106.078	108.057	1.979	214.135	Isotope-2	0.00783368	1.49524	0.812846	0.053039
107.049	108.057	1.008	215.106	Isotope-1	0.00930381	0.137566	0.881581	0.0535245
107.086	108.057	0.971	215.143	Isotope-1	0.0130889	0.0495619	0.810287	0.053543
53.026	108.081	55.055	161.107	Unkwnown	-0.00812121	0.677699	0.812913	0.026513
79.054	108.081	29.027	187.135	Unkwnown	-0.00868841	0.169815	0.88675	0.039527
80.049	108.081	28.032	188.13	C2H4	-0.00965957	1.74627	0.889824	0.0400245
106.078	108.081	2.003	214.159	Isotope-2	0.00239791	2.54263	0.86774	0.053039
107.049	108.081	1.032	215.13	Isotope-1	0.00424269	0.243514	0.975739	0.0535245
107.086	108.081	0.995	215.167	Isotope-1	0.0102497	0.0938471	0.959572	0.053543
108.057	108.081	0.024	216.138	Resolution	-0.00699234	1.49037	0.934347	0.0540285
53.026	108.093	55.067	161.119	Unkwnown	-0.0127998	0.69624	0.818822	0.026513
79.054	108.093	29.039	187.147	Unkwnown	-0.0130777	0.172711	0.883185	0.039527
80.049	108.093	28.044	188.142	C2H4	-0.0135979	1.74932	0.873772	0.0400245
106.078	108.093	2.015	214.171	Isotope-2	-0.00175775	2.57986	0.863046	0.053039
107.049	108.093	1.044	215.142	Isotope-1	-9.77e-05	0.250178	0.982013	0.0535245
107.086	108.093	1.007	215.179	Isotope-1	0.00585826	0.098315	0.985613	0.053543
108.057	108.093	0.036	216.15	Resolution	-0.00983373	1.43459	0.880969	0.0540285
108.081	108.093	0.012	216.174	Resolution	-0.00411898	1.01121	0.990911	0.0540405
57.07	109.065	51.995	166.135	Unkwnown	-0.0267345	0.160961	0.881683	0.028535
68.049	109.065	41.016	177.114	Unkwnown	0.0110894	5.35776	0.877449	0.0340245
69.07	109.065	39.995	178.135	Unkwnown	-0.00531602	0.206883	0.893442	0.034535
95.086	109.065	13.979	204.151	CH2	0.0143677	0.31191	0.951496	0.047543
96.057	109.065	13.008	205.122	Unkwnown	0.00586965	3.94096	0.929797	0.0480285
97.065	109.065	12	206.13	C	-0.00997247	1.17253	0.914072	0.0485325
97.101	109.065	11.964	206.166	C	0.0107574	0.344735	0.844292	0.0485505
57.07	109.076	52.006	166.146	Unkwnown	-0.0520885	0.290489	0.893775	0.028535
68.049	109.076	41.027	177.125	Unkwnown	0.0190263	9.53694	0.876367	0.0340245
69.07	109.076	40.006	178.146	Unkwnown	-0.0102024	0.368298	0.89424	0.034535
71.086	109.076	37.99	180.162	Unkwnown	-0.0229863	0.525908	0.80121	0.035543
95.086	109.076	13.99	204.162	CH2	0.0246124	0.5559	0.95167	0.047543
96.057	109.076	13.019	205.133	Unkwnown	0.0109061	6.97677	0.923379	0.0480285
97.065	109.076	12.011	206.141	C	-0.0126003	2.03678	0.891461	0.0485325
97.101	109.076	11.975	206.177	C	0.00807321	0.644469	0.887103	0.0485505
109.065	109.076	0.011	218.141	Resolution	0.00248285	1.75478	0.984738	0.0545325
57.07	109.089	52.019	166.159	Unkwnown	-0.0665492	0.361212	0.89312	0.028535
68.049	109.089	41.04	177.138	Unkwnown	0.02438	11.7429	0.867004	0.0340245
69.07	109.089	40.019	178.159	Unkwnown	-0.0131727	0.455938	0.8902	0.034535
71.086	109.089	38.003	180.175	Unkwnown	-0.0335707	0.660761	0.808855	0.035543
83.086	109.089	26.003	192.175	C2H2	0.0504059	0.562342	0.806807	0.041543
85.101	109.089	23.988	194.19	Unkwnown	-0.0144619	1.00551	0.80857	0.0425505
95.086	109.089	14.003	204.175	CH2	0.0307022	0.686026	0.944272	0.047543
96.057	109.089	13.032	205.146	Unkwnown	0.0132318	8.62805	0.917378	0.0480285
97.065	109.089	12.024	206.154	C	-0.013896	2.50218	0.880325	0.0485325
97.101	109.089	11.988	206.19	C	0.00437546	0.812931	0.899654	0.0485505
109.065	109.089	0.024	218.154	Resolution	0.00350221	2.16468	0.976172	0.0545325
109.076	109.089	0.013	218.165	Resolution	-0.00133512	1.24149	0.997812	0.054538
57.07	109.101	52.031	166.171	Unkwnown	-0.0703306	0.379831	0.886927	0.028535
68.049	109.101	41.052	177.15	Unkwnown	0.0292264	12.1654	0.84838	0.0340245
69.07	109.101	40.031	178.171	Unkwnown	-0.0124697	0.476721	0.879463	0.034535
71.086	109.101	38.015	180.187	Unkwnown	-0.038551	0.700975	0.810306	0.035543
83.086	109.101	26.015	192.187	C2H2	0.0525735	0.591523	0.80168	0.041543
85.101	109.101	24	194.202	Unkwnown	-0.0195018	1.07091	0.813217	0.0425505
95.086	109.101	14.015	204.187	CH2	0.0317058	0.722019	0.939428	0.047543
96.057	109.101	13.044	205.158	Unkwnown	0.0131055	9.0877	0.912508	0.0480285
97.065	109.101	12.036	206.166	C	-0.0112033	2.59888	0.863947	0.0485325
97.101	109.101	12	206.202	C	0.000939958	0.864681	0.903818	0.0485505
109.065	109.101	0.036	218.166	Resolution	0.00338473	2.27583	0.969581	0.0545325
109.076	109.101	0.025	218.177	Resolution	-0.00273714	1.30985	0.99464	0.054538
109.089	109.101	0.012	218.19	Resolution	-0.00188033	1.05705	0.998705	0.0545445
57.07	110.06	52.99	167.13	Unkwnown	-0.00220362	0.0117497	0.811849	0.028535
68.049	110.06	42.011	178.109	Unkwnown	-0.000229735	0.42761	0.88611	0.0340245
69.033	110.06	41.027	179.093	Unkwnown	7.74e-05	0.154547	0.822861	0.0345165
69.07	110.06	40.99	179.13	Unkwnown	-0.000825214	0.0153922	0.836908	0.034535
81.07	110.06	28.99	191.13	Unkwnown	0.00512773	0.00942022	0.812596	0.040535
82.078	110.06	27.982	192.138	C2H4	0.00355452	0.139035	0.854286	0.041039
95.086	110.06	14.974	205.146	Unkwnown	0.000287488	0.0241838	0.927984	0.047543
96.057	110.06	14.003	206.117	CH2	0.000262876	0.284858	0.850165	0.0480285
97.065	110.06	12.995	207.125	Unkwnown	-0.00166982	0.091513	0.900522	0.0485325
108.057	110.06	2.003	218.117	Isotope-2	0.00339243	0.299235	0.877463	0.0540285
109.065	110.06	0.995	219.125	Isotope-1	-0.000366799	0.0739037	0.933399	0.0545325
109.076	110.06	0.984	219.136	Isotope-1	-3.51e-05	0.0401737	0.902608	0.054538
109.089	110.06	0.971	219.149	Isotope-1	0.000196992	0.0316789	0.884772	0.0545445
109.101	110.06	0.959	219.161	Isotope-1	0.000443354	0.0293173	0.866483	0.0545505
57.07	110.073	53.003	167.143	Unkwnown	-0.00443871	0.0265216	0.851661	0.028535
68.049	110.073	42.024	178.122	Unkwnown	0.00120958	0.909883	0.875598	0.0340245
69.07	110.073	41.003	179.143	Unkwnown	-0.000832489	0.0339673	0.860069	0.034535
82.078	110.073	27.995	192.151	C2H4	0.00937838	0.292863	0.835431	0.041039
95.086	110.073	14.987	205.159	Unkwnown	0.00112688	0.0547471	0.977765	0.047543
96.057	110.073	14.016	206.13	CH2	0.000838418	0.652456	0.904144	0.0480285
97.065	110.073	13.008	207.138	Unkwnown	-0.0018619	0.194786	0.890709	0.0485325
108.057	110.073	2.016	218.13	Isotope-2	0.00973219	0.593144	0.807282	0.0540285
109.065	110.073	1.008	219.138	Isotope-1	-0.000150922	0.165697	0.972347	0.0545325
109.076	110.073	0.997	219.149	Isotope-1	-0.000112304	0.0932103	0.973513	0.054538
109.089	110.073	0.984	219.162	Isotope-1	0.000174358	0.074408	0.966313	0.0545445
109.101	110.073	0.972	219.174	Isotope-1	0.000491731	0.0697573	0.958753	0.0545505
110.06	110.073	0.013	220.133	Resolution	0.00228632	2.06244	0.957418	0.05503
57.07	110.084	53.014	167.154	Unkwnown	-0.00698393	0.0388801	0.852566	0.028535
68.049	110.084	42.035	178.133	Unkwnown	0.00126644	1.33526	0.877125	0.0340245
69.07	110.084	41.014	179.154	Unkwnown	-0.00159029	0.0496276	0.858672	0.034535
82.078	110.084	28.006	192.162	C2H4	0.0133736	0.426724	0.830319	0.041039
95.086	110.084	14.998	205.17	Unkwnown	0.0011683	0.0802771	0.978587	0.047543
96.057	110.084	14.027	206.141	CH2	0.00082023	0.954268	0.902688	0.0480285
97.065	110.084	13.019	207.149	Unkwnown	-0.00281889	0.282227	0.881012	0.0485325
97.101	110.084	12.983	207.185	Unkwnown	0.00216462	0.0829959	0.812673	0.0485505
109.065	110.084	1.019	219.149	Isotope-1	-0.000504069	0.241375	0.966946	0.0545325
109.076	110.084	1.008	219.16	Isotope-1	-0.000787733	0.137295	0.979047	0.054538
109.089	110.084	0.995	219.173	Isotope-1	-0.000485783	0.110034	0.975748	0.0545445
109.101	110.084	0.983	219.185	Isotope-1	-5.58e-05	0.103291	0.96944	0.0545505
110.06	110.084	0.024	220.144	Resolution	0.00343373	2.96133	0.938096	0.05503
110.073	110.084	0.011	220.157	Resolution	-0.000247449	1.45496	0.99297	0.0550365
57.07	110.109	53.039	167.179	Unkwnown	-0.00869725	0.0451921	0.84744	0.028535
68.049	110.109	42.06	178.158	Unkwnown	0.0016521	1.51681	0.852146	0.0340245
69.07	110.109	41.039	179.179	Unkwnown	-0.00208642	0.0571488	0.846411	0.034535
82.078	110.109	28.031	192.187	C2H4	0.0155065	0.482158	0.802417	0.041039
95.086	110.109	15.023	205.195	Unkwnown	0.000721323	0.0934685	0.975271	0.047543
96.057	110.109	14.052	206.166	CH2	2.99e-05	1.12042	0.906323	0.0480285
97.065	110.109	13.044	207.174	Unkwnown	-0.00302829	0.320939	0.857083	0.0485325
97.101	110.109	13.008	207.21	Unkwnown	0.000809571	0.0998233	0.835956	0.0485505
109.065	110.109	1.044	219.174	Isotope-1	-0.00117163	0.280611	0.96155	0.0545325
109.076	110.109	1.033	219.185	Isotope-1	-0.00181133	0.160992	0.982106	0.054538
109.089	110.109	1.02	219.198	Isotope-1	-0.00158105	0.129471	0.982227	0.0545445
109.101	110.109	1.008	219.21	Isotope-1	-0.00124269	0.122112	0.980473	0.0545505
110.06	110.109	0.049	220.169	Resolution	0.0043647	3.33609	0.903737	0.05503
110.073	110.109	0.036	220.182	Resolution	-0.000720183	1.68412	0.982968	0.0550365
110.084	110.109	0.025	220.193	Resolution	-0.000573079	1.16213	0.993941	0.055042
93.033	111.08	18.047	204.113	H2O	0.050244	0.047387	0.919537	0.0465165
93.07	111.08	18.01	204.15	H2O	0.0499212	0.134376	0.87392	0.046535
94.041	111.08	17.039	205.121	Unkwnown	0.0417653	0.647166	0.925684	0.0470205
95.049	111.08	16.031	206.129	Unkwnown	0.0183161	0.392097	0.906326	0.0475245
96.057	111.08	15.023	207.137	Unkwnown	-0.000527298	6.46879	0.823145	0.0480285
57.07	111.092	54.022	168.162	Unkwnown	-0.0292277	0.263879	0.848795	0.028535
69.07	111.092	42.022	180.162	Unkwnown	0.00857345	0.334949	0.854856	0.034535
71.086	111.092	40.006	182.178	Unkwnown	-0.0412234	0.559347	0.883368	0.035543
77.06	111.092	34.032	188.152	Unkwnown	0.0339127	5.31109	0.804035	0.03853
83.086	111.092	28.006	194.178	C2H4	0.0442434	0.440439	0.820388	0.041543
84.081	111.092	27.011	195.173	Unkwnown	0.0211617	5.63261	0.807308	0.0420405
85.101	111.092	25.991	196.193	C2H2	-0.0253421	0.852196	0.883862	0.0425505
86.096	111.092	24.996	197.188	Unkwnown	-0.0258133	11.4714	0.839793	0.043048
91.039	111.092	20.053	202.131	Unkwnown	0.0927921	0.870931	0.818259	0.0455195
91.05	111.092	20.042	202.142	Unkwnown	0.0933311	0.734997	0.8168	0.045525
91.058	111.092	20.034	202.15	Unkwnown	0.0938408	0.705031	0.816892	0.045529
93.033	111.092	18.059	204.125	H2O	0.0968239	0.0402918	0.862653	0.0465165
93.07	111.092	18.022	204.162	H2O	0.0964961	0.114305	0.81168	0.046535
94.041	111.092	17.051	205.133	Unkwnown	0.0883076	0.555693	0.867822	0.0470205
95.049	111.092	16.043	206.141	Unkwnown	0.0589594	0.356819	0.900809	0.0475245
96.057	111.092	15.035	207.149	Unkwnown	0.0245696	6.44952	0.891424	0.0480285
97.065	111.092	14.027	208.157	CH2	0.0105789	1.81642	0.833963	0.0485325
97.101	111.092	13.991	208.193	CH2	0.0010224	0.658038	0.943251	0.0485505
99.104	111.092	11.988	210.196	C	0.0596241	1.46547	0.810766	0.049552
99.117	111.092	11.975	210.209	C	0.0349624	1.77198	0.866398	0.0495585
109.065	111.092	2.027	220.157	Isotope-2	0.0422011	1.42141	0.837032	0.0545325
109.076	111.092	2.016	220.168	Isotope-2	0.039512	0.813041	0.85395	0.054538
109.089	111.092	2.003	220.181	Isotope-2	0.0405021	0.654476	0.855447	0.0545445
109.101	111.092	1.991	220.193	Isotope-2	0.0428564	0.61507	0.850712	0.0545505
111.08	111.092	0.012	222.172	Resolution	0.0538614	0.851493	0.929033	0.05554
57.07	111.104	54.034	168.174	Unkwnown	-0.038907	0.28899	0.882881	0.028535
69.07	111.104	42.034	180.174	Unkwnown	0.00832563	0.357674	0.867591	0.034535
71.086	111.104	40.018	182.19	Unkwnown	-0.0514271	0.611263	0.918136	0.035543
83	111.104	28.104	194.104	Unkwnown	0.0261138	0.387723	0.812268	0.0415
83.086	111.104	28.018	194.19	C2H4	0.0377741	0.491712	0.866506	0.041543
84.081	111.104	27.023	195.185	Unkwnown	0.0168138	6.15358	0.836668	0.0420405
85.101	111.104	26.003	196.205	C2H2	-0.0369003	0.941032	0.92811	0.0425505
86.096	111.104	25.008	197.2	Unkwnown	-0.0358784	12.5958	0.875954	0.043048
95.049	111.104	16.055	206.153	Unkwnown	0.0751362	0.352593	0.848331	0.0475245
96.057	111.104	15.047	207.161	Unkwnown	0.0331111	6.63564	0.87152	0.0480285
97.065	111.104	14.039	208.169	CH2	0.0141678	1.90789	0.832007	0.0485325
97.101	111.104	14.003	208.205	CH2	-0.00741532	0.725527	0.988594	0.0485505
99.104	111.104	12	210.208	C	0.0568714	1.6187	0.850232	0.049552
99.117	111.104	11.987	210.221	C	0.0288675	1.96449	0.912657	0.0495585
109.065	111.104	2.039	220.169	Isotope-2	0.0432673	1.52549	0.853289	0.0545325
109.076	111.104	2.028	220.18	Isotope-2	0.036407	0.890263	0.888256	0.054538
109.089	111.104	2.015	220.193	Isotope-2	0.0359072	0.722344	0.896902	0.0545445
109.101	111.104	2.003	220.205	Isotope-2	0.0372505	0.683156	0.89762	0.0545505
110.084	111.104	1.02	221.188	Isotope-1	0.0596193	5.88197	0.819173	0.055042
110.109	111.104	0.995	221.213	Isotope-1	0.0594959	5.14937	0.838454	0.0550545
111.08	111.104	0.024	222.184	Resolution	0.0778337	0.802276	0.834055	0.05554
111.092	111.104	0.012	222.196	Resolution	0.008169	1.02734	0.977965	0.055546
57.07	111.117	54.047	168.187	Unkwnown	-0.0404711	0.28945	0.878323	0.028535
69.07	111.117	42.047	180.187	Unkwnown	0.0106332	0.352291	0.849404	0.034535
71.086	111.117	40.031	182.203	Unkwnown	-0.0549226	0.616296	0.919889	0.035543
83	111.117	28.117	194.117	Unkwnown	0.0256208	0.386557	0.803331	0.0415
83.086	111.117	28.031	194.203	C2H4	0.0347248	0.496474	0.867721	0.041543
84.081	111.117	27.036	195.198	Unkwnown	0.0163597	6.13476	0.827827	0.0420405
85.101	111.117	26.016	196.218	C2H2	-0.0419783	0.954641	0.935559	0.0425505
86.096	111.117	25.021	197.213	Unkwnown	-0.0394705	12.7099	0.877751	0.043048
95.049	111.117	16.068	206.166	Unkwnown	0.0804235	0.338573	0.810626	0.0475245
96.057	111.117	15.06	207.174	Unkwnown	0.0378556	6.44405	0.840809	0.0480285
97.065	111.117	14.052	208.182	CH2	0.0189937	1.8568	0.804325	0.0485325
97.101	111.117	14.016	208.218	CH2	-0.0117128	0.734965	0.995012	0.0485505
99.104	111.117	12.013	210.221	C	0.0539387	1.635	0.852593	0.049552
99.117	111.117	12	210.234	C	0.0245898	1.99433	0.920242	0.0495585
109.065	111.117	2.052	220.182	Isotope-2	0.0448301	1.50426	0.835892	0.0545325
109.076	111.117	2.041	220.193	Isotope-2	0.0357962	0.887972	0.880302	0.054538
109.089	111.117	2.028	220.206	Isotope-2	0.0343877	0.723763	0.892942	0.0545445
109.101	111.117	2.016	220.218	Isotope-2	0.0349486	0.687191	0.897163	0.0545505
110.084	111.117	1.033	221.201	Isotope-1	0.059724	5.84104	0.807855	0.055042
110.109	111.117	1.008	221.226	Isotope-1	0.0582075	5.15411	0.833465	0.0550545
111.092	111.117	0.025	222.209	Resolution	0.0118406	1.00575	0.951947	0.055546
111.104	111.117	0.013	222.221	Resolution	-0.00126158	1.00058	0.994428	0.055552
93.033	112.007	18.974	205.04	Unkwnown	-0.000715341	0.0020136	0.878784	0.0465165
93.07	112.007	18.937	205.077	Unkwnown	-0.000563412	0.00555936	0.819974	0.046535
94.041	112.007	17.966	206.048	H2O	-0.00103893	0.0273476	0.887212	0.0470205
95.049	112.007	16.958	207.056	Unkwnown	-0.00176274	0.0159851	0.835551	0.0475245
111.08	112.007	0.927	223.087	Isotope-1	-0.00272432	0.0418552	0.95004	0.05554
93.033	112.052	19.019	205.085	Unkwnown	0.00279489	0.00636309	0.853618	0.0465165
93.07	112.052	18.982	205.122	Unkwnown	0.00299613	0.0178215	0.808829	0.046535
94.041	112.052	18.011	206.093	H2O	0.00181591	0.0862389	0.861356	0.0470205
95.049	112.052	17.003	207.101	Unkwnown	-0.000143655	0.049702	0.800284	0.0475245
111.08	112.052	0.972	223.132	Isotope-1	-0.00434411	0.136264	0.952508	0.05554
112.007	112.052	0.045	224.059	Resolution	0.00511797	3.14877	0.969941	0.0560035
57.07	112.088	55.018	169.158	Unkwnown	-0.00265933	0.0250016	0.853699	0.028535
69.07	112.088	43.018	181.158	Unkwnown	0.00105349	0.0315294	0.852512	0.034535
71.086	112.088	41.002	183.174	Unkwnown	-0.00341678	0.0521911	0.876997	0.035543
77.06	112.088	35.028	189.148	Unkwnown	0.00338337	0.501504	0.808546	0.03853
84.081	112.088	28.007	196.169	C2H4	0.00227974	0.529051	0.805234	0.0420405
85.101	112.088	26.987	197.189	Unkwnown	-0.00177235	0.0789562	0.871662	0.0425505
86.096	112.088	25.992	198.184	C2H2	-0.00229392	1.08493	0.845759	0.043048
93.033	112.088	19.055	205.121	Unkwnown	0.00952687	0.00373931	0.847768	0.0465165
93.07	112.088	19.018	205.158	Unkwnown	0.00937284	0.0107206	0.810773	0.046535
94.041	112.088	18.047	206.129	H2O	0.00871076	0.0516784	0.85948	0.0470205
95.049	112.088	17.039	207.137	Unkwnown	0.00593233	0.0332909	0.894012	0.0475245
96.057	112.088	16.031	208.145	Unkwnown	0.00242168	0.611595	0.899619	0.0480285
97.065	112.088	15.023	209.153	Unkwnown	0.00108859	0.172302	0.839183	0.0485325
97.101	112.088	14.987	209.189	Unkwnown	0.00103576	0.05988	0.910167	0.0485505
99.117	112.088	12.971	211.205	Unkwnown	0.0040474	0.161974	0.843037	0.0495585
109.065	112.088	3.023	221.153	Isotope-3	0.00416671	0.134213	0.839085	0.0545325
109.076	112.088	3.012	221.164	Isotope-3	0.00409005	0.07598	0.846849	0.054538
109.089	112.088	2.999	221.177	Isotope-3	0.00425395	0.0609047	0.844462	0.0545445
109.101	112.088	2.987	221.189	Isotope-3	0.00452283	0.0570668	0.837129	0.0545505
111.08	112.088	1.008	223.168	Isotope-1	0.00526925	0.0803917	0.935069	0.05554
111.092	112.088	0.996	223.18	Isotope-1	0.000625922	0.0924238	0.982514	0.055546
111.104	112.088	0.984	223.192	Isotope-1	0.00111042	0.084806	0.946705	0.055552
111.117	112.088	0.971	223.205	Isotope-1	0.00202581	0.0813213	0.91341	0.0555585
112.007	112.088	0.081	224.095	Resolution	0.0121445	1.62469	0.82888	0.0560035
112.052	112.088	0.036	224.14	Resolution	0.0100087	0.493623	0.817674	0.056026
57.07	112.112	55.042	169.182	Unkwnown	-0.00501921	0.0319272	0.896606	0.028535
69.07	112.112	43.042	181.182	Unkwnown	0.000722251	0.0386948	0.861604	0.034535
71.086	112.112	41.026	183.198	Unkwnown	-0.00622635	0.0671577	0.929248	0.035543
83	112.112	29.112	195.112	Unkwnown	0.00255685	0.0421112	0.810213	0.0415
83.086	112.112	29.026	195.198	Unkwnown	0.0037279	0.0536418	0.868324	0.041543
84.081	112.112	28.031	196.193	C2H4	0.00125073	0.676646	0.846322	0.0420405
85.101	112.112	27.011	197.213	Unkwnown	-0.00473261	0.103741	0.942837	0.0425505
86.096	112.112	26.016	198.208	C2H2	-0.00489827	1.40146	0.898263	0.043048
95.049	112.112	17.063	207.161	Unkwnown	0.00854954	0.0368347	0.816625	0.0475245
96.057	112.112	16.055	208.169	Unkwnown	0.00350828	0.71446	0.864209	0.0480285
97.065	112.112	15.047	209.177	Unkwnown	0.00153249	0.204874	0.820725	0.0485325
97.101	112.112	15.011	209.213	Unkwnown	-0.00110902	0.0788728	0.986774	0.0485505
99.104	112.112	13.008	211.216	Unkwnown	0.00556961	0.178766	0.865435	0.049552
99.117	112.112	12.995	211.229	Unkwnown	0.00255114	0.216252	0.925784	0.0495585
109.065	112.112	3.047	221.177	Isotope-3	0.00435851	0.166171	0.854405	0.0545325
109.076	112.112	3.036	221.188	Isotope-3	0.00343923	0.0977416	0.896208	0.054538
109.089	112.112	3.023	221.201	Isotope-3	0.00333797	0.0794729	0.906604	0.0545445
109.101	112.112	3.011	221.213	Isotope-3	0.00344756	0.0752925	0.90878	0.0545505
110.073	112.112	2.039	222.185	Isotope-2	0.00606162	0.928364	0.811266	0.0550365
110.084	112.112	2.028	222.196	Isotope-2	0.00586505	0.649859	0.832517	0.055042
110.109	112.112	2.003	222.221	Isotope-2	0.00581416	0.570004	0.853717	0.0550545
111.092	112.112	1.02	223.204	Isotope-1	0.00132406	0.108358	0.949301	0.055546
111.104	112.112	1.008	223.216	Isotope-1	2.14e-05	0.107339	0.986735	0.055552
111.117	112.112	0.995	223.229	Isotope-1	0.000242542	0.106913	0.98847	0.0555585
112.088	112.112	0.024	224.2	Resolution	0.00138222	1.13497	0.93347	0.056044
93.033	113.015	19.982	206.048	Unkwnown	0.00506333	0.0276142	0.871425	0.0465165
94.041	113.015	18.974	207.056	Unkwnown	0.000998717	0.373492	0.874982	0.0470205
95.049	113.015	17.966	208.064	H2O	-0.00709187	0.214388	0.810021	0.0475245
111.08	113.015	1.935	224.095	Isotope-2	-0.022855	0.575855	0.943417	0.05554
112.007	113.015	1.008	225.022	Isotope-1	0.0178392	13.1794	0.95105	0.0560035
112.052	113.015	0.963	225.067	Isotope-1	-0.00362065	4.18725	0.980576	0.056026
112.088	113.015	0.927	225.103	Isotope-1	-0.0304897	5.74016	0.812236	0.056044
111.08	113.06	1.98	224.14	Isotope-2	0.00236105	0.335595	0.892811	0.05554
112.007	113.06	1.053	225.067	Isotope-1	0.0268548	7.54041	0.882638	0.0560035
112.052	113.06	1.008	225.112	Isotope-1	0.0122451	2.4989	0.949597	0.056026
113.015	113.06	0.045	226.075	Resolution	0.0150315	0.58991	0.957252	0.0565075
57.07	113.096	56.026	170.166	Unkwnown	0.00126055	0.0463522	0.876993	0.028535
68.049	113.096	45.047	181.145	Unkwnown	0.01431	1.44284	0.818327	0.0340245
69.07	113.096	44.026	182.166	Unkwnown	0.00918343	0.0568245	0.848766	0.034535
71.086	113.096	42.01	184.182	Unkwnown	0.000283949	0.0958523	0.892086	0.035543
83	113.096	30.096	196.096	Unkwnown	0.00824647	0.0685361	0.885298	0.0415
83.086	113.096	30.01	196.182	Unkwnown	0.0152041	0.074797	0.815074	0.041543
84.081	113.096	29.015	197.177	Unkwnown	0.00805116	1.04715	0.883721	0.0420405
85.065	113.096	28.031	198.161	C2H4	0.00589212	0.468547	0.871789	0.0425325
85.101	113.096	27.995	198.197	C2H4	0.00451162	0.140851	0.8616	0.0425505
86.096	113.096	27	199.192	Unkwnown	-0.000513528	2.12483	0.918821	0.043048
97.065	113.096	16.031	210.161	Unkwnown	0.00898757	0.31276	0.844905	0.0485325
97.101	113.096	15.995	210.197	Unkwnown	0.0132671	0.0956738	0.806011	0.0485505
99.09	113.1	14	212.19	CH2	0.02	0.25	0.81	0.05
99.104	113.096	13.992	212.2	CH2	0.0169038	0.257097	0.83974	0.049552
99.117	113.096	13.979	212.213	CH2	0.0146369	0.291375	0.840908	0.0495585
111.092	113.096	2.004	224.188	Isotope-2	0.0145948	0.138748	0.819103	0.055546
111.104	113.096	1.992	224.2	Isotope-2	0.0145561	0.130552	0.808482	0.055552
112.088	113.096	1.008	225.184	Isotope-1	0.0131589	1.52467	0.846347	0.056044
112.112	113.096	0.984	225.208	Isotope-1	0.0146171	1.21283	0.818512	0.056056
57.07	113.107	56.037	170.177	Unkwnown	-0.00325132	0.067826	0.893247	0.028535
69.07	113.107	44.037	182.177	Unkwnown	0.0105701	0.0796559	0.830812	0.034535
71.086	113.107	42.021	184.193	Unkwnown	-0.00818228	0.147695	0.956973	0.035543
83	113.107	30.107	196.107	Unkwnown	0.00847492	0.0975144	0.876312	0.0415
83.086	113.107	30.021	196.193	Unkwnown	0.0156809	0.11309	0.856555	0.041543
84.081	113.107	29.026	197.188	Unkwnown	0.00783117	1.50015	0.881823	0.0420405
85.101	113.107	28.006	198.208	C2H4	-0.00382664	0.224463	0.956064	0.0425505
86.096	113.107	27.011	199.203	Unkwnown	-0.00815851	3.21613	0.968587	0.043048
97.101	113.107	16.006	210.208	Unkwnown	0.00994676	0.153003	0.897927	0.0485505
99.09	113.11	14.02	212.2	CH2	0.02	0.38	0.87	0.05
99.104	113.107	14.003	212.211	CH2	0.0161512	0.407648	0.926341	0.049552
99.117	113.107	13.99	212.224	CH2	0.0111768	0.475062	0.954359	0.0495585
111.092	113.107	2.015	224.199	Isotope-2	0.014636	0.210337	0.864822	0.055546
111.104	113.107	2.003	224.211	Isotope-2	0.0124752	0.206804	0.892104	0.055552
111.117	113.107	1.99	224.224	Isotope-2	0.0132064	0.204686	0.887897	0.0555585
112.088	113.107	1.019	225.195	Isotope-1	0.0139971	2.23866	0.865595	0.056044
112.112	113.107	0.995	225.219	Isotope-1	0.0122067	1.93559	0.909972	0.056056
113.096	113.107	0.011	226.203	Resolution	-0.000644827	1.36528	0.951044	0.056548
105.037	114.091	9.054	219.128	Unkwnown	-0.00557505	0.826114	0.875575	0.0525185
105.037	114.128	9.091	219.165	Unkwnown	0.00302412	0.290026	0.834614	0.0525185
114.091	114.128	0.037	228.219	Resolution	0.00426022	0.36161	0.981896	0.0570455
45.033	115.075	70.042	160.108	Unkwnown	0.00308169	0.0149331	0.848023	0.0225165
57.033	115.075	58.042	172.108	Unkwnown	0.00963266	0.0922337	0.812398	0.0285165
59.049	115.075	56.026	174.124	Unkwnown	0.00801614	0.0074084	0.818658	0.0295245
83.01	115.075	32.065	198.085	Unkwnown	-0.00282293	1.79288	0.809466	0.041505
86.036	115.075	29.039	201.111	Unkwnown	-0.00527429	2.54471	0.856746	0.043018
86.06	115.075	29.015	201.135	Unkwnown	-0.00517444	1.76246	0.819646	0.04303
87.044	115.075	28.031	202.119	C2H4	-0.00145391	0.331562	0.895173	0.043522
87.08	115.075	27.995	202.155	C2H4	0.00628155	0.521986	0.839622	0.04354
101.1	115.08	13.98	216.17	CH2	0	0.76	0.83	0.05
86.036	115.112	29.076	201.148	Unkwnown	-0.0020004	1.27977	0.86006	0.043018
86.06	115.112	29.052	201.172	Unkwnown	-0.00215756	0.898926	0.834475	0.04303
87.044	115.112	28.068	202.156	Unkwnown	0.000686478	0.156749	0.844999	0.043522
87.08	115.112	28.032	202.192	C2H4	0.00365021	0.267275	0.857691	0.04354
115.075	115.112	0.037	230.187	Resolution	0.00105296	0.486166	0.97028	0.0575375
86.036	115.123	29.087	201.159	Unkwnown	-0.000917438	0.760414	0.813975	0.043018
87.044	115.123	28.079	202.167	Unkwnown	0.000585212	0.0943626	0.810792	0.043522
87.08	115.123	28.043	202.203	C2H4	0.00210341	0.168764	0.862758	0.04354
115.075	115.123	0.048	230.198	Resolution	0.00081367	0.292344	0.929489	0.0575375
115.112	115.123	0.011	230.235	Resolution	-3.24e-06	0.615806	0.980864	0.057556
103.032	117.07	14.038	220.102	CH2	0.000100717	1.31179	0.852632	0.051516
103.042	117.07	14.028	220.112	CH2	-0.000847405	0.997433	0.940871	0.051521
103.075	117.07	13.995	220.145	CH2	0.00478371	0.544212	0.879117	0.0515375
103.112	117.07	13.958	220.182	CH2	0.0117119	1.4684	0.823459	0.051556
103.032	117.078	14.046	220.11	CH2	0.000298648	1.35169	0.823339	0.051516
103.042	117.078	14.036	220.12	CH2	-0.00103014	1.05001	0.928038	0.051521
103.075	117.078	14.003	220.153	CH2	0.00460921	0.588362	0.890338	0.0515375
103.112	117.078	13.966	220.19	CH2	0.0120655	1.603	0.84223	0.051556
117.07	117.078	0.008	234.148	Resolution	-0.000295812	1.06327	0.996276	0.058535
103.042	117.091	14.049	220.133	CH2	-0.00135012	1.03275	0.903391	0.051521
103.075	117.091	14.016	220.166	CH2	0.00377194	0.601452	0.900502	0.0515375
103.112	117.091	13.979	220.203	CH2	0.0113531	1.65732	0.861753	0.051556
117.07	117.091	0.021	234.161	Resolution	-0.000846015	1.0604	0.983386	0.058535
117.078	117.091	0.013	234.169	Resolution	-0.000661323	1.00438	0.994038	0.058539
103.042	117.102	14.06	220.144	CH2	-0.0016351	0.954234	0.878254	0.051521
103.075	117.102	14.027	220.177	CH2	0.00281702	0.570758	0.899032	0.0515375
103.112	117.102	13.99	220.214	CH2	0.00997214	1.59056	0.87024	0.051556
117.07	117.102	0.032	234.172	Resolution	-0.00133849	0.991104	0.967099	0.058535
117.078	117.102	0.024	234.18	Resolution	-0.00124426	0.943774	0.982801	0.058539
117.091	117.102	0.011	234.193	Resolution	-0.000726741	0.946586	0.995976	0.0585455
117.07	117.127	0.057	234.197	Resolution	-0.0030411	0.440597	0.865377	0.058535
117.078	117.127	0.049	234.205	Resolution	-0.00313309	0.428145	0.897479	0.058539
117.091	117.127	0.036	234.218	Resolution	-0.00301879	0.437456	0.926599	0.0585455
117.102	117.127	0.025	234.229	Resolution	-0.00277978	0.469332	0.944861	0.058551
117.07	118.065	0.995	235.135	Isotope-1	-0.00168511	0.150304	0.807803	0.058535
117.07	118.078	1.008	235.148	Isotope-1	-0.00172676	0.148108	0.824929	0.058535
117.078	118.078	1	235.156	Isotope-1	-0.00164761	0.136861	0.813657	0.058539
118.065	118.078	0.013	236.143	Resolution	-4.27e-05	0.943254	0.977774	0.0590325
117.07	118.081	1.011	235.151	Isotope-1	-0.00164596	0.138711	0.817132	0.058535
117.078	118.081	1.003	235.159	Isotope-1	-0.00157508	0.128386	0.80727	0.058539
118.065	118.081	0.016	236.146	Resolution	-6.63e-05	0.879011	0.96386	0.0590325
118.078	118.081	0.003	236.159	Resolution	-3.03e-05	0.939687	0.99402	0.059039
118.065	118.086	0.021	236.151	Resolution	-9.51e-05	0.740624	0.931701	0.0590325
118.078	118.086	0.008	236.164	Resolution	-7.01e-05	0.802688	0.974141	0.059039
118.081	118.086	0.005	236.167	Resolution	-4.67e-05	0.859976	0.986628	0.0590405
102.104	119.06	16.956	221.164	Unkwnown	0.0108054	2.62748	0.821911	0.051052
102.104	119.086	16.982	221.19	Unkwnown	0.011262	3.40763	0.817554	0.051052
119.06	119.086	0.026	238.146	Resolution	-0.00288076	1.30338	0.998785	0.05953
119.06	120.081	1.021	239.141	Isotope-1	-5.14e-05	0.179879	0.852635	0.05953
119.086	120.081	0.995	239.167	Isotope-1	0.000382395	0.136445	0.845154	0.059543
87.08	121.052	33.972	208.132	Unkwnown	0.00549964	0.961533	0.811639	0.04354
115.123	121.052	5.929	236.175	Unkwnown	-0.00069411	4.9561	0.818846	0.0575615
79.054	121.065	42.011	200.119	Unkwnown	-0.00658963	0.365213	0.827555	0.039527
80.049	121.065	41.016	201.114	Unkwnown	-0.00660357	3.637	0.804365	0.0400245
105.07	121.065	15.995	226.135	Unkwnown	-0.0049177	1.05289	0.809346	0.052535
106.078	121.065	14.987	227.143	Unkwnown	0.0129683	6.05747	0.894099	0.053039
107.049	121.065	14.016	228.114	CH2	0.0246735	0.4732	0.82882	0.0535245
107.086	121.065	13.979	228.151	CH2	0.0366236	0.17992	0.812446	0.053543
108.081	121.065	12.984	229.146	Unkwnown	0.016929	1.91928	0.83301	0.0540405
108.093	121.065	12.972	229.158	Unkwnown	0.0249294	1.88728	0.835647	0.0540465
121.052	121.065	0.013	242.117	Resolution	-0.00180062	1.54736	0.939494	0.060526
79.054	121.089	42.035	200.143	Unkwnown	-0.0221161	0.563538	0.811573	0.039527
106.078	121.089	15.011	227.167	Unkwnown	0.00564892	9.67881	0.906816	0.053039
107.049	121.089	14.04	228.138	CH2	0.0240011	0.761225	0.84294	0.0535245
107.086	121.089	14.003	228.175	CH2	0.0421071	0.299292	0.850796	0.053543
108.081	121.089	13.008	229.17	Unkwnown	0.0107061	3.12755	0.85991	0.0540405
108.093	121.089	12.996	229.182	Unkwnown	0.023427	3.09398	0.867445	0.0540465
121.052	121.089	0.037	242.141	Resolution	-0.00612563	2.16139	0.835009	0.060526
121.065	121.089	0.024	242.154	Resolution	-0.0115265	1.53565	0.971817	0.0605325
106.078	121.101	15.023	227.179	Unkwnown	0.000248611	9.5276	0.90474	0.053039
107.049	121.101	14.052	228.15	CH2	0.0182704	0.749972	0.840716	0.0535245
107.086	121.101	14.015	228.187	CH2	0.0357656	0.297894	0.856472	0.053543
108.081	121.101	13.02	229.182	Unkwnown	0.00494012	3.09241	0.861536	0.0540405
108.093	121.101	13.008	229.194	Unkwnown	0.0174527	3.06307	0.870127	0.0540465
121.065	121.101	0.036	242.166	Resolution	-0.0145324	1.47437	0.944371	0.0605325
121.089	121.101	0.012	242.19	Resolution	-0.00523166	0.98332	0.99475	0.0605445
105.037	122.06	17.023	227.097	Unkwnown	0.00119301	0.225007	0.888252	0.0525185
105.057	122.06	17.003	227.117	Unkwnown	0.00493484	0.194682	0.827381	0.0525285
114.091	122.06	7.969	236.151	Unkwnown	0.00458894	0.244936	0.913346	0.0570455
114.128	122.06	7.932	236.188	Unkwnown	0.00203606	0.665877	0.914334	0.057064
79.054	122.084	43.03	201.138	Unkwnown	0.00619674	0.085567	0.815966	0.039527
105.037	122.084	17.047	227.121	Unkwnown	-0.000346271	0.239372	0.821826	0.0525185
105.057	122.084	17.027	227.141	Unkwnown	0.00127752	0.235059	0.867551	0.0525285
106.078	122.084	16.006	228.162	Unkwnown	0.0113366	1.34256	0.829943	0.053039
121.065	122.084	1.019	243.149	Isotope-1	0.00978868	0.198377	0.831611	0.0605325
121.089	122.084	0.995	243.173	Isotope-1	0.0114872	0.126426	0.843019	0.0605445
121.101	122.084	0.983	243.185	Isotope-1	0.0123102	0.126408	0.834551	0.0605505
122.06	122.084	0.024	244.144	Resolution	-0.00179522	1.07226	0.933412	0.06103
79.054	122.096	43.042	201.15	Unkwnown	0.00224063	0.0746222	0.838638	0.039527
80.049	122.096	42.047	202.145	Unkwnown	0.0021973	0.745446	0.813876	0.0400245
105.057	122.096	17.039	227.153	Unkwnown	-0.000969625	0.192189	0.837039	0.0525285
105.07	122.096	17.026	227.166	Unkwnown	0.00258522	0.215081	0.817768	0.052535
106.078	122.096	16.018	228.174	Unkwnown	0.00634207	1.22322	0.893124	0.053039
108.081	122.096	14.015	230.177	CH2	0.0069876	0.394958	0.848319	0.0540405
108.093	122.096	14.003	230.189	CH2	0.00874727	0.381708	0.836501	0.0540465
121.065	122.096	1.031	243.161	Isotope-1	0.00487129	0.181803	0.8991	0.0605325
121.089	122.096	1.007	243.185	Isotope-1	0.00622228	0.118568	0.931113	0.0605445
121.101	122.096	0.995	243.197	Isotope-1	0.00691428	0.119699	0.930466	0.0605505
122.06	122.096	0.036	244.156	Resolution	-0.00204571	0.809439	0.832442	0.06103
122.084	122.096	0.012	244.18	Resolution	-0.00215278	0.82419	0.973184	0.061042
57.07	123.092	66.022	180.162	Unkwnown	-0.0183304	0.211133	0.910258	0.028535
68.049	123.092	55.043	191.141	Unkwnown	0.0452792	6.37871	0.823971	0.0340245
69.07	123.092	54.022	192.162	Unkwnown	0.0186009	0.257512	0.878358	0.034535
71.086	123.092	52.006	194.178	Unkwnown	-0.00077693	0.389882	0.831752	0.035543
85.101	123.092	37.991	208.193	Unkwnown	0.0105878	0.592991	0.83092	0.0425505
86.096	123.092	36.996	209.188	Unkwnown	0.00647737	8.15719	0.804745	0.043048
95.086	123.092	28.006	218.178	C2H4	0.0486981	0.372692	0.902227	0.047543
96.057	123.092	27.035	219.149	Unkwnown	0.0345774	4.8384	0.899551	0.0480285
97.065	123.092	26.027	220.157	C2H2	0.0233544	1.36891	0.842433	0.0485325
97.101	123.092	25.991	220.193	C2H2	0.0262598	0.465843	0.897156	0.0485505
109.065	123.092	14.027	232.157	CH2	0.0292409	1.21295	0.956789	0.0545325
109.076	123.092	14.016	232.168	CH2	0.0272537	0.692433	0.973222	0.054538
109.089	123.092	14.003	232.181	CH2	0.0278179	0.558395	0.976047	0.0545445
109.101	123.092	13.991	232.193	CH2	0.0285585	0.529124	0.978572	0.0545505
110.06	123.092	13.032	233.152	Unkwnown	0.0594101	13.7265	0.854517	0.05503
110.073	123.092	13.019	233.165	Unkwnown	0.0375988	6.9721	0.935475	0.0550365
110.084	123.092	13.008	233.176	Unkwnown	0.0394523	4.76972	0.938149	0.055042
110.109	123.092	12.983	233.201	Unkwnown	0.0411564	4.12314	0.948148	0.0550545
111.092	123.092	12	234.184	C	0.0451515	0.619638	0.837085	0.055546
111.104	123.092	11.988	234.196	C	0.0355788	0.622796	0.882024	0.055552
111.117	123.092	11.975	234.209	C	0.0370657	0.619456	0.882115	0.0555585
112.088	123.092	11.004	235.18	Unkwnown	0.0426571	6.62388	0.839011	0.056044
112.112	123.092	10.98	235.204	Unkwnown	0.0340135	5.85887	0.902041	0.056056
105.037	124.039	19.002	229.076	Unkwnown	0.00117697	0.116044	0.949286	0.0525185
105.057	124.039	18.982	229.096	Unkwnown	0.00384814	0.0916131	0.806855	0.0525285
114.091	124.039	9.948	238.13	Unkwnown	0.00339837	0.119455	0.923301	0.0570455
114.128	124.039	9.911	238.167	Unkwnown	0.00260011	0.309346	0.88064	0.057064
122.06	124.039	1.979	246.099	Isotope-2	0.00263415	0.418677	0.86811	0.06103
105.037	124.057	19.02	229.094	Unkwnown	0.00150091	0.127837	0.956834	0.0525185
105.057	124.057	19	229.114	Unkwnown	0.00421352	0.103651	0.835084	0.0525285
114.091	124.057	9.966	238.148	Unkwnown	0.00400086	0.130824	0.92521	0.0570455
114.128	124.057	9.929	238.185	Unkwnown	0.00305117	0.341388	0.889171	0.057064
122.06	124.057	1.997	246.117	Isotope-2	0.00284237	0.473582	0.898366	0.06103
122.084	124.057	1.973	246.141	Isotope-2	0.00520408	0.367316	0.801476	0.061042
124.039	124.057	0.018	248.096	Resolution	0.000413841	1.08353	0.991315	0.0620195
83.01	125.042	42.032	208.052	Unkwnown	0.00153154	0.773887	0.801331	0.041505
86.036	125.042	39.006	211.078	Unkwnown	0.000286952	1.11466	0.8606	0.043018
86.06	125.042	38.982	211.102	Unkwnown	0.000108479	0.785466	0.837752	0.04303
87.044	125.042	37.998	212.086	Unkwnown	0.00243224	0.139071	0.861913	0.043522
103.032	125.042	22.01	228.074	Unkwnown	0.00313566	0.879234	0.831313	0.051516
115.075	125.042	9.967	240.117	Unkwnown	0.00362692	0.395005	0.905975	0.0575375
115.112	125.042	9.93	240.154	Unkwnown	0.00318719	0.779722	0.895943	0.057556
115.123	125.042	9.919	240.165	Unkwnown	0.00363067	1.20993	0.872773	0.0575615
45.033	125.06	80.027	170.093	Unkwnown	0.00534846	0.00972804	0.822482	0.0225165
86.036	125.06	39.024	211.096	Unkwnown	-3.23e-05	1.65227	0.825796	0.043018
86.06	125.06	39	211.12	Unkwnown	-0.000384531	1.16961	0.807487	0.04303
87.044	125.06	38.016	212.104	Unkwnown	0.00258825	0.213453	0.856178	0.043522
87.08	125.06	37.98	212.14	Unkwnown	0.00694772	0.354394	0.845419	0.04354
97.04	125.06	28.02	222.1	C2H4	0.000912624	0.306243	0.811606	0.04852
103.032	125.06	22.028	228.092	Unkwnown	0.00387266	1.33139	0.81512	0.051516
115.075	125.06	9.985	240.135	Unkwnown	0.00421777	0.614803	0.912758	0.0575375
115.112	125.06	9.948	240.172	Unkwnown	0.00339462	1.22453	0.910747	0.057556
115.123	125.06	9.937	240.183	Unkwnown	0.00394882	1.91836	0.895744	0.0575615
125.042	125.06	0.018	250.102	Resolution	-0.000815285	1.50965	0.977147	0.062521
45.033	125.071	80.038	170.104	Unkwnown	0.0080788	0.0118411	0.820189	0.0225165
69.033	125.071	56.038	194.104	Unkwnown	-6.51e-05	0.427894	0.806957	0.0345165
85.065	125.071	40.006	210.136	Unkwnown	-0.00404613	0.339701	0.818695	0.0425325
86.036	125.071	39.035	211.107	Unkwnown	0.0019443	1.975	0.809072	0.043018
87.044	125.071	38.027	212.115	Unkwnown	0.00460852	0.261261	0.859115	0.043522
87.08	125.071	37.991	212.151	Unkwnown	0.00961984	0.443366	0.866621	0.04354
97.04	125.071	28.031	222.111	C2H4	0.00158865	0.391301	0.849986	0.04852
103.032	125.071	22.039	228.103	Unkwnown	0.0061966	1.62817	0.817198	0.051516
115.075	125.071	9.996	240.146	Unkwnown	0.00703264	0.734551	0.893772	0.0575375
115.112	125.071	9.959	240.183	Unkwnown	0.00590158	1.47466	0.89891	0.057556
115.123	125.071	9.948	240.194	Unkwnown	0.00639786	2.33214	0.892542	0.0575615
125.042	125.071	0.029	250.113	Resolution	0.00104817	1.80148	0.955588	0.062521
125.06	125.071	0.011	250.131	Resolution	0.00172726	1.20883	0.99051	0.06253
41.039	125.084	84.045	166.123	Unkwnown	0.0119948	0.0190001	0.815687	0.0205195
44.062	125.084	81.022	169.146	Unkwnown	-0.00547893	1.29531	0.83551	0.022031
68.049	125.084	57.035	193.133	Unkwnown	0.0102027	1.36107	0.859479	0.0340245
69.033	125.084	56.051	194.117	Unkwnown	0.00683896	0.567194	0.919578	0.0345165
69.07	125.084	56.014	194.154	Unkwnown	0.00709322	0.0508967	0.844338	0.034535
83	125.084	42.084	208.084	Unkwnown	0.00733594	0.0593918	0.852099	0.0415
84.081	125.084	41.003	209.165	Unkwnown	0.00723379	0.905555	0.851396	0.0420405
85.065	125.084	40.019	210.149	Unkwnown	0.00263794	0.437536	0.906504	0.0425325
97.04	125.084	28.044	222.124	C2H4	0.0133362	0.445521	0.832267	0.04852
97.065	125.084	28.019	222.149	C2H4	0.00423464	0.303167	0.909788	0.0485325
110.06	125.084	15.024	235.144	Unkwnown	0.0154581	2.67975	0.816604	0.05503
113.096	125.084	11.988	238.18	C	0.00384235	0.78616	0.876844	0.056548
125.071	125.084	0.013	250.155	Resolution	0.0154807	0.977942	0.839412	0.0625355
57.07	125.096	68.026	182.166	Unkwnown	-0.00431001	0.0855317	0.920829	0.028535
68.049	125.096	57.047	193.145	Unkwnown	0.019546	2.67278	0.860936	0.0340245
69.07	125.096	56.026	194.166	Unkwnown	0.00799612	0.108484	0.923985	0.034535
71.086	125.096	54.01	196.182	Unkwnown	-0.00548709	0.175545	0.930744	0.035543
83	125.096	42.096	208.096	Unkwnown	0.0102962	0.123304	0.906243	0.0415
83.086	125.096	42.01	208.182	Unkwnown	0.0179069	0.146715	0.908148	0.041543
84.081	125.096	41.015	209.177	Unkwnown	0.00885148	1.91458	0.917649	0.0420405
85.101	125.096	39.995	210.197	Unkwnown	0.000626732	0.263563	0.917927	0.0425505
86.096	125.096	39	211.192	Unkwnown	-0.00314323	3.71546	0.912713	0.043048
96.057	125.096	29.039	221.153	Unkwnown	0.0219521	1.80247	0.836335	0.0480285
97.065	125.096	28.031	222.161	C2H4	0.00760099	0.597273	0.916371	0.0485325
97.101	125.096	27.995	222.197	C2H4	0.0105582	0.198226	0.951451	0.0485505
99.09	125.1	26	224.19	C2H2	0.03	0.44	0.81	0.05
99.104	125.096	25.992	224.2	C2H2	0.0253479	0.467269	0.867206	0.049552
99.117	125.096	25.979	224.213	C2H2	0.0193203	0.547624	0.898646	0.0495585
109.065	125.096	16.031	234.161	Unkwnown	0.021332	0.441063	0.869171	0.0545325
109.076	125.096	16.02	234.172	Unkwnown	0.0204861	0.252337	0.886668	0.054538
109.089	125.096	16.007	234.185	Unkwnown	0.020742	0.203309	0.888831	0.0545445
109.101	125.096	15.995	234.197	Unkwnown	0.0216456	0.190477	0.881186	0.0545505
110.073	125.096	15.023	235.169	Unkwnown	0.0259639	2.45878	0.823628	0.0550365
110.084	125.096	15.012	235.18	Unkwnown	0.0259803	1.70329	0.836375	0.055042
110.109	125.096	14.987	235.205	Unkwnown	0.0271356	1.45648	0.836208	0.0550545
111.092	125.096	14.004	236.188	CH2	0.0152823	0.278588	0.936462	0.055546
111.104	125.096	13.992	236.2	CH2	0.0131365	0.27088	0.955217	0.055552
111.117	125.096	13.979	236.213	CH2	0.0145792	0.266044	0.94344	0.0555585
112.088	125.096	13.008	237.184	Unkwnown	0.0151346	2.93206	0.924725	0.056044
112.112	125.096	12.984	237.208	Unkwnown	0.0140857	2.48408	0.952566	0.056056
113.096	125.096	12	238.192	C	0.00429184	1.60466	0.91178	0.056548
113.107	125.096	11.989	238.203	C	0.00693136	1.14468	0.934144	0.0565535
123.092	125.096	2.004	248.188	Isotope-2	0.0132117	0.349885	0.874525	0.061546
125.084	125.096	0.012	250.18	Resolution	0.012026	1.64729	0.84072	0.062542
57.07	125.107	68.037	182.177	Unkwnown	-0.012069	0.126085	0.900707	0.028535
68.049	125.107	57.058	193.156	Unkwnown	0.0266258	3.7764	0.807243	0.0340245
69.07	125.107	56.037	194.177	Unkwnown	0.00835071	0.156346	0.885496	0.034535
71.086	125.107	54.021	196.193	Unkwnown	-0.0180471	0.267786	0.941199	0.035543
83	125.107	42.107	208.107	Unkwnown	0.0110408	0.178856	0.872456	0.0415
83.086	125.107	42.021	208.193	Unkwnown	0.0193734	0.219514	0.901451	0.041543
84.081	125.107	41.026	209.188	Unkwnown	0.00822547	2.79731	0.889235	0.0420405
85.101	125.107	40.006	210.208	Unkwnown	-0.0109083	0.409586	0.945574	0.0425505
86.096	125.107	39.011	211.203	Unkwnown	-0.0135062	5.62311	0.915759	0.043048
96.057	125.107	29.05	221.164	Unkwnown	0.0254228	2.69695	0.830063	0.0480285
97.065	125.107	28.042	222.172	C2H4	0.0103804	0.83847	0.854414	0.0485325
97.101	125.107	28.006	222.208	C2H4	0.00435664	0.308552	0.982517	0.0485505
99.09	125.11	26.02	224.2	C2H2	0.04	0.67	0.82	0.05
99.104	125.107	26.003	224.211	C2H2	0.0275768	0.725542	0.892292	0.049552
99.117	125.107	25.99	224.224	C2H2	0.0168572	0.863188	0.938831	0.0495585
109.065	125.107	16.042	234.172	Unkwnown	0.0271784	0.638749	0.83587	0.0545325
109.076	125.107	16.031	234.183	Unkwnown	0.023767	0.375166	0.875563	0.054538
109.089	125.107	16.018	234.196	Unkwnown	0.0234941	0.304628	0.884604	0.0545445
109.101	125.107	16.006	234.208	Unkwnown	0.0243087	0.287251	0.882658	0.0545505
110.084	125.107	15.023	235.191	Unkwnown	0.0329785	2.4977	0.814011	0.055042
110.109	125.107	14.998	235.216	Unkwnown	0.0334286	2.17199	0.827617	0.0550545
111.092	125.107	14.015	236.199	CH2	0.0131015	0.427378	0.9526	0.055546
111.104	125.107	14.003	236.211	CH2	0.00856236	0.420829	0.984289	0.055552
111.117	125.107	13.99	236.224	CH2	0.00986374	0.417311	0.981707	0.0555585
112.088	125.107	13.019	237.195	Unkwnown	0.0142239	4.43428	0.927383	0.056044
112.112	125.107	12.995	237.219	Unkwnown	0.00991936	3.86381	0.982722	0.056056
113.096	125.107	12.011	238.203	C	0.00333961	2.30541	0.868544	0.056548
113.107	125.107	12	238.214	C	0.00146601	1.73688	0.939598	0.0565535
123.092	125.107	2.015	248.199	Isotope-2	0.0121836	0.524399	0.869937	0.061546
125.096	125.107	0.011	250.203	Resolution	-0.00626015	1.48119	0.982668	0.062548
57.07	125.12	68.05	182.19	Unkwnown	-0.0159212	0.145474	0.882067	0.028535
69.07	125.12	56.05	194.19	Unkwnown	0.00884754	0.178493	0.858977	0.034535
71.086	125.12	54.034	196.206	Unkwnown	-0.0254185	0.314487	0.937816	0.035543
83	125.12	42.12	208.12	Unkwnown	0.0113366	0.205265	0.85002	0.0415
83.086	125.12	42.034	208.206	Unkwnown	0.0196089	0.255122	0.889343	0.041543
84.081	125.12	41.039	209.201	Unkwnown	0.0080311	3.21244	0.866598	0.0420405
85.101	125.12	40.019	210.221	Unkwnown	-0.0181796	0.484958	0.949894	0.0425505
86.096	125.12	39.024	211.216	Unkwnown	-0.0197049	6.58615	0.910026	0.043048
96.057	125.12	29.063	221.177	Unkwnown	0.0269584	3.12402	0.816016	0.0480285
97.065	125.12	28.055	222.185	C2H4	0.012746	0.943669	0.816632	0.0485325
97.101	125.12	28.019	222.221	C2H4	2.33e-05	0.364948	0.986427	0.0485505
99.09	125.12	26.03	224.21	C2H2	0.04	0.79	0.81	0.05
99.104	125.12	26.016	224.224	C2H2	0.027464	0.858367	0.895433	0.049552
99.117	125.12	26.003	224.237	C2H2	0.0140765	1.02789	0.948452	0.0495585
109.065	125.12	16.055	234.185	Unkwnown	0.0302308	0.730111	0.811359	0.0545325
109.076	125.12	16.044	234.196	Unkwnown	0.0253871	0.433031	0.85833	0.054538
109.089	125.12	16.031	234.209	Unkwnown	0.0246882	0.352996	0.870653	0.0545445
109.101	125.12	16.019	234.221	Unkwnown	0.0253517	0.333821	0.871246	0.0545505
110.109	125.12	15.011	235.229	Unkwnown	0.0365439	2.50684	0.810949	0.0550545
111.092	125.12	14.028	236.212	CH2	0.0111613	0.501916	0.949329	0.055546
111.104	125.12	14.016	236.224	CH2	0.00515767	0.49707	0.986739	0.055552
111.117	125.12	14.003	236.237	CH2	0.00618542	0.49508	0.988568	0.0555585
112.088	125.12	13.032	237.208	Unkwnown	0.0131956	5.17381	0.918157	0.056044
112.112	125.12	13.008	237.232	Unkwnown	0.00672741	4.56513	0.985394	0.056056
113.096	125.12	12.024	238.216	C	0.00291951	2.63654	0.842689	0.056548
113.107	125.12	12.013	238.227	C	-0.00215503	2.03412	0.933547	0.0565535
123.092	125.12	2.028	248.212	Isotope-2	0.0114016	0.608647	0.85719	0.061546
125.096	125.12	0.024	250.216	Resolution	-0.00983109	1.71689	0.966755	0.062548
125.107	125.12	0.013	250.227	Resolution	-0.00422427	1.1744	0.996704	0.0625535
57.07	127.112	70.042	184.182	Unkwnown	0.0055737	0.0415631	0.85328	0.028535
69.07	127.112	58.042	196.182	Unkwnown	0.0128716	0.0506498	0.821941	0.034535
71.086	127.112	56.026	198.198	Unkwnown	0.00475667	0.0858243	0.867106	0.035543
83	127.112	44.112	210.112	Unkwnown	0.011488	0.0621	0.869624	0.0415
83.086	127.112	44.026	210.198	Unkwnown	0.0177308	0.0679251	0.802258	0.041543
84.081	127.112	43.031	211.193	Unkwnown	0.0110968	0.954816	0.877515	0.0420405
85.065	127.112	42.047	212.177	Unkwnown	0.00969035	0.420568	0.852354	0.0425325
85.101	127.112	42.011	212.213	Unkwnown	0.00856882	0.126023	0.837419	0.0425505
86.096	127.112	41.016	213.208	Unkwnown	0.00386514	1.91075	0.899987	0.043048
99.104	127.112	28.008	226.216	C2H4	0.0196095	0.230455	0.818731	0.049552
99.117	127.112	27.995	226.229	C2H4	0.0177628	0.259427	0.814331	0.0495585
112.088	127.112	15.024	239.2	Unkwnown	0.0169968	1.3315	0.805028	0.056044
113.096	127.112	14.016	240.208	CH2	0.00470958	0.89082	0.970287	0.056548
113.107	127.112	14.005	240.219	CH2	0.00882857	0.592218	0.925927	0.0565535
125.084	127.112	2.028	252.196	Isotope-2	0.0103145	0.881327	0.862998	0.062542
125.096	127.112	2.016	252.208	Isotope-2	0.010127	0.454078	0.869901	0.062548
125.107	127.112	2.005	252.219	Isotope-2	0.0142388	0.286271	0.825889	0.0625535
57.07	127.136	70.066	184.206	Unkwnown	0.00461532	0.0626097	0.873886	0.028535
69.07	127.136	58.066	196.206	Unkwnown	0.0176649	0.0730733	0.808709	0.034535
71.086	127.136	56.05	198.222	Unkwnown	0.000160603	0.13613	0.935249	0.035543
83	127.136	44.136	210.136	Unkwnown	0.0160688	0.0888549	0.846534	0.0415
83.086	127.136	44.05	210.222	Unkwnown	0.0223911	0.103651	0.832367	0.041543
84.081	127.136	43.055	211.217	Unkwnown	0.014902	1.3832	0.864579	0.0420405
85.101	127.136	42.035	212.237	Unkwnown	0.00428377	0.206513	0.933253	0.0425505
86.096	127.136	41.04	213.232	Unkwnown	-4.93e-05	2.97502	0.952779	0.043048
97.101	127.136	30.035	224.237	Unkwnown	0.0183942	0.136487	0.849356	0.0485505
99.09	127.14	28.04	226.23	C2H4	0.03	0.35	0.84	0.05
99.104	127.136	28.032	226.24	C2H4	0.0228218	0.373627	0.902045	0.049552
99.117	127.136	28.019	226.253	C2H4	0.0184607	0.433539	0.925149	0.0495585
111.092	127.136	16.044	238.228	Unkwnown	0.0218343	0.190977	0.833008	0.055546
111.104	127.136	16.032	238.24	Unkwnown	0.0204324	0.185401	0.848405	0.055552
111.117	127.136	16.019	238.253	Unkwnown	0.0214315	0.182041	0.837675	0.0555585
112.088	127.136	15.048	239.224	Unkwnown	0.0206206	2.06255	0.847875	0.056044
112.112	127.136	15.024	239.248	Unkwnown	0.0201448	1.7371	0.868258	0.056056
113.096	127.136	14.04	240.232	CH2	0.00709933	1.25856	0.932275	0.056548
113.107	127.136	14.029	240.243	CH2	0.00806266	0.915824	0.973569	0.0565535
125.096	127.136	2.04	252.232	Isotope-2	0.0113726	0.685329	0.893038	0.062548
125.107	127.136	2.029	252.243	Isotope-2	0.0148906	0.456937	0.896515	0.0625535
125.12	127.136	2.016	252.256	Isotope-2	0.0170774	0.384654	0.888652	0.06256
127.112	127.136	0.024	254.248	Resolution	0.000847842	1.40391	0.95449	0.063556
116.143	127.903	11.76	244.046	Unkwnown	1.25e-22	0.290405	1	0.0580715
57.07	128.12	71.05	185.19	Unkwnown	-0.000941029	0.00761159	0.856278	0.028535
71.086	128.12	57.034	199.206	Unkwnown	-0.000821593	0.0151459	0.840227	0.035543
84.081	128.12	44.039	212.201	Unkwnown	0.000406111	0.165452	0.834419	0.0420405
85.101	128.12	43.019	213.221	Unkwnown	-0.000214882	0.0224673	0.819892	0.0425505
86.096	128.12	42.024	214.216	Unkwnown	-0.00107926	0.341841	0.883844	0.043048
113.096	128.12	15.024	241.216	Unkwnown	-0.000631433	0.152839	0.913808	0.056548
113.107	128.12	15.013	241.227	Unkwnown	-3.89e-05	0.103468	0.888105	0.0565535
125.096	128.12	3.024	253.216	Isotope-3	0.000302125	0.0778534	0.818294	0.062548
127.112	128.12	1.008	255.232	Isotope-1	-0.00141395	0.171006	0.939019	0.063556
127.136	128.12	0.984	255.256	Isotope-1	-0.00102622	0.114167	0.922345	0.063568
57.07	128.143	71.073	185.213	Unkwnown	-0.00122146	0.00806431	0.867394	0.028535
71.086	128.143	57.057	199.229	Unkwnown	-0.00164853	0.0172224	0.912876	0.035543
83	128.143	45.143	211.143	Unkwnown	0.000517506	0.0109586	0.805538	0.0415
83.086	128.143	45.057	211.229	Unkwnown	0.00119254	0.0130425	0.807545	0.041543
84.081	128.143	44.062	212.224	Unkwnown	0.000275979	0.173327	0.834916	0.0420405
85.101	128.143	43.042	213.244	Unkwnown	-0.00112943	0.0261356	0.911182	0.0425505
86.096	128.143	42.047	214.239	Unkwnown	-0.0016914	0.377137	0.931326	0.043048
97.101	128.143	31.042	225.244	Unkwnown	0.000678804	0.0172065	0.824939	0.0485505
99.09	128.14	29.05	227.24	Unkwnown	0	0.04	0.82	0.05
99.104	128.143	29.039	227.247	Unkwnown	0.00125662	0.0469249	0.873787	0.049552
99.117	128.143	29.026	227.26	Unkwnown	0.000707409	0.0544634	0.896419	0.0495585
111.104	128.143	17.039	239.247	Unkwnown	0.000987038	0.0231559	0.816685	0.055552
111.117	128.143	17.026	239.26	Unkwnown	0.00108854	0.0228353	0.809674	0.0555585
112.088	128.143	16.055	240.231	Unkwnown	0.00102123	0.257101	0.814651	0.056044
112.112	128.143	16.031	240.255	Unkwnown	0.000897023	0.219089	0.84383	0.056056
113.096	128.143	15.047	241.239	Unkwnown	-0.000695535	0.157572	0.899828	0.056548
113.107	128.143	15.036	241.25	Unkwnown	-0.000587985	0.114874	0.941647	0.0565535
125.096	128.143	3.047	253.239	Isotope-3	-0.000154341	0.0857228	0.860831	0.062548
125.107	128.143	3.036	253.25	Isotope-3	0.000297177	0.0570488	0.862702	0.0625535
125.12	128.143	3.023	253.263	Isotope-3	0.000571121	0.0480167	0.855057	0.06256
127.112	128.143	1.031	255.255	Isotope-1	-0.00144508	0.175035	0.917912	0.063556
127.136	128.143	1.007	255.279	Isotope-1	-0.00160615	0.125539	0.968434	0.063568
128.12	128.143	0.023	256.263	Resolution	0.000206415	0.991199	0.946671	0.06406
116.143	128.911	12.768	245.054	Unkwnown	1.22e-07	1.96409	0.877016	0.0580715
127.903	128.911	1.008	256.814	Isotope-1	1.22e-07	6.76329	0.877016	0.0639515
69.033	129.045	60.012	198.078	Unkwnown	0.00236424	0.229299	0.801092	0.0345165
115.075	129.045	13.97	244.12	CH2	0.0070809	0.355475	0.801231	0.0575375
115.112	129.045	13.933	244.157	CH2	0.00610446	0.747458	0.843948	0.057556
115.123	129.045	13.922	244.168	CH2	0.00604975	1.2213	0.865599	0.0575615
125.042	129.045	4.003	254.087	Isotope-4	0.00417589	0.872483	0.857082	0.062521
125.06	129.045	3.985	254.105	Isotope-4	0.00501656	0.55842	0.848032	0.06253
125.071	129.045	3.974	254.116	Isotope-4	0.00424391	0.460924	0.854678	0.0625355
87.08	129.07	41.99	216.15	Unkwnown	0.00897651	0.34149	0.841447	0.04354
97.04	129.07	32.03	226.11	Unkwnown	0.00290191	0.299499	0.820066	0.04852
115.075	129.07	13.995	244.145	CH2	0.00702379	0.564095	0.864032	0.0575375
115.112	129.07	13.958	244.182	CH2	0.00561562	1.17499	0.901557	0.057556
115.123	129.07	13.947	244.193	CH2	0.00566059	1.90308	0.916675	0.0575615
121.052	129.07	8.018	250.122	Unkwnown	0.00968243	0.285201	0.834338	0.060526
125.042	129.07	4.028	254.112	Isotope-4	0.00320059	1.32438	0.884255	0.062521
125.06	129.07	4.01	254.13	Isotope-4	0.00408474	0.868353	0.896195	0.06253
125.071	129.07	3.999	254.141	Isotope-4	0.0029895	0.71243	0.897696	0.0625355
129.045	129.07	0.025	258.115	Resolution	-0.0018776	1.43708	0.976839	0.0645225
80.049	129.091	49.042	209.14	Unkwnown	0.00470609	0.753418	0.80049	0.0400245
87.08	129.091	42.011	216.171	Unkwnown	0.00568606	0.360785	0.888303	0.04354
97.04	129.091	32.051	226.131	Unkwnown	0.000432784	0.296629	0.811754	0.04852
115.075	129.091	14.016	244.166	CH2	0.00442019	0.56266	0.861699	0.0575375
115.112	129.091	13.979	244.203	CH2	0.0028497	1.18507	0.9091	0.057556
115.123	129.091	13.968	244.214	CH2	0.00284981	1.92521	0.92716	0.0575615
121.052	129.091	8.039	250.143	Unkwnown	0.00673261	0.293404	0.858021	0.060526
121.065	129.091	8.026	250.156	Unkwnown	0.00827456	0.168562	0.816168	0.0605325
125.042	129.091	4.049	254.133	Isotope-4	0.00109654	1.28356	0.857013	0.062521
125.06	129.091	4.031	254.151	Isotope-4	0.00149933	0.865578	0.893182	0.06253
125.071	129.091	4.02	254.162	Isotope-4	0.000373543	0.711536	0.896306	0.0625355
129.045	129.091	0.046	258.136	Resolution	-0.00339663	1.3653	0.928231	0.0645225
129.07	129.091	0.021	258.161	Resolution	-0.00225347	0.981266	0.981385	0.064535
87.08	129.127	42.047	216.207	Unkwnown	0.000650673	0.200409	0.904534	0.04354
115.112	129.127	14.015	244.239	CH2	-0.000240828	0.604374	0.850221	0.057556
115.123	129.127	14.004	244.25	CH2	-0.000323296	0.992401	0.876497	0.0575615
121.052	129.127	8.075	250.179	Unkwnown	0.00160042	0.153289	0.822324	0.060526
125.06	129.127	4.067	254.187	Isotope-4	-0.000832613	0.436317	0.825632	0.06253
125.071	129.127	4.056	254.198	Isotope-4	-0.00161796	0.36752	0.848869	0.0625355
129.07	129.127	0.057	258.197	Resolution	-0.00234744	0.476271	0.874106	0.064535
129.091	129.127	0.036	258.218	Resolution	-0.00167529	0.508935	0.933745	0.0645455
87.08	129.139	42.059	216.219	Unkwnown	-0.000533779	0.154404	0.868673	0.04354
115.123	129.139	14.016	244.262	CH2	-0.00116078	0.74879	0.824394	0.0575615
129.07	129.139	0.069	258.209	Resolution	-0.00262928	0.356494	0.81566	0.064535
129.091	129.139	0.048	258.23	Resolution	-0.00220829	0.385535	0.881783	0.0645455
129.127	129.139	0.012	258.266	Resolution	-0.00116293	0.787654	0.981837	0.0645635
87.08	129.151	42.071	216.231	Unkwnown	-0.00192832	0.122542	0.817183	0.04354
129.091	129.151	0.06	258.242	Resolution	-0.00316247	0.300677	0.815293	0.0645455
129.127	129.151	0.024	258.278	Resolution	-0.00253455	0.639513	0.945104	0.0645635
129.139	129.151	0.012	258.29	Resolution	-0.00162967	0.820309	0.972511	0.0645695
85.065	131.06	45.995	216.125	Unkwnown	-0.00310555	0.11878	0.810453	0.0425325
103.032	131.06	28.028	234.092	C2H4	0.00011131	0.601539	0.853592	0.051516
113.096	131.06	17.964	244.156	H2O	-0.00311763	0.220886	0.810638	0.056548
125.042	131.06	6.018	256.102	Unkwnown	-0.000111629	0.537198	0.806467	0.062521
127.112	131.06	3.948	258.172	Isotope-4	-0.00420931	0.246274	0.830149	0.063556
129.045	131.06	2.015	260.105	Isotope-2	-0.00124556	0.523514	0.8005	0.0645225
103.042	131.107	28.065	234.149	C2H4	-0.000121665	0.453939	0.851072	0.051521
117.07	131.107	14.037	248.177	CH2	0.000553237	0.435745	0.866222	0.058535
117.078	131.107	14.029	248.185	CH2	0.0007959	0.402026	0.85296	0.058539
117.091	131.107	14.016	248.198	CH2	0.00127805	0.38577	0.827079	0.0585455
131.06	131.107	0.047	262.167	Resolution	0.000538311	0.943446	0.858625	0.06553
103.075	131.143	28.068	234.218	C2H4	-0.00116059	0.0769912	0.830414	0.0515375
103.112	131.143	28.031	234.255	C2H4	-0.000211342	0.221802	0.832187	0.051556
131.06	132.066	1.006	263.126	Isotope-1	-0.0014463	0.28195	0.81069	0.06553
131.06	133.065	2.005	264.125	Isotope-2	0.000965475	1.93128	0.913826	0.06553
131.107	133.065	1.958	264.172	Isotope-2	0.00332963	1.55627	0.809668	0.0655535
131.06	133.101	2.041	264.161	Isotope-2	-0.00201354	2.63067	0.864559	0.06553
131.107	133.101	1.994	264.208	Isotope-2	0.000108753	2.27532	0.82206	0.0655535
133.065	133.101	0.036	266.166	Resolution	-0.00371554	1.38915	0.964508	0.0665325
81.07	135.08	54.01	216.15	Unkwnown	-0.114674	0.439787	0.886764	0.040535
82.078	135.08	53.002	217.158	Unkwnown	-0.153634	5.60888	0.860774	0.041039
107.049	135.08	28.031	242.129	C2H4	-0.0537792	1.74721	0.813043	0.0535245
81.07	135.117	54.047	216.187	Unkwnown	-0.212248	0.763038	0.885894	0.040535
82.078	135.117	53.039	217.195	Unkwnown	-0.278887	9.707	0.857416	0.041039
107.049	135.117	28.068	242.166	C2H4	-0.107016	3.0376	0.810963	0.0535245
135.08	135.117	0.037	270.197	Resolution	-0.0143759	1.75161	0.999003	0.06754
69.033	137.047	68.014	206.08	Unkwnown	-0.000803258	0.206144	0.837183	0.0345165
80.049	137.047	56.998	217.096	Unkwnown	0.00335759	0.441753	0.802933	0.0400245
87.08	137.047	49.967	224.127	Unkwnown	0.00459013	0.192083	0.808446	0.04354
97.04	137.047	40.007	234.087	Unkwnown	0.000501346	0.179883	0.841402	0.04852
115.112	137.047	21.935	252.159	Unkwnown	0.0032535	0.617264	0.810079	0.057556
115.123	137.047	21.924	252.17	Unkwnown	0.003213	1.00797	0.830409	0.0575615
125.042	137.047	12.005	262.089	C	0.00123825	0.75282	0.859768	0.062521
125.06	137.047	11.987	262.107	C	0.00162349	0.499797	0.881927	0.06253
125.071	137.047	11.976	262.118	C	0.00076191	0.419445	0.903436	0.0625355
125.084	137.047	11.963	262.131	C	-0.00182825	0.326515	0.818568	0.062542
129.045	137.047	8.002	266.092	Unkwnown	-0.00046771	0.741141	0.862447	0.0645225
129.07	137.047	7.977	266.117	Unkwnown	0.000554166	0.513119	0.878263	0.064535
129.091	137.047	7.956	266.138	Unkwnown	0.00197363	0.509436	0.87163	0.0645455
129.127	137.047	7.92	266.174	Unkwnown	0.00453855	0.881433	0.821912	0.0645635
131.06	137.047	5.987	268.107	Unkwnown	0.00374076	1.06212	0.808572	0.06553
131.107	137.047	5.94	268.154	Unkwnown	0.00407749	0.992295	0.830052	0.0655535
53.026	137.06	84.034	190.086	Unkwnown	0.00260147	0.277671	0.82153	0.026513
69.033	137.06	68.027	206.093	Unkwnown	-0.00211561	0.287893	0.807022	0.0345165
79.054	137.06	58.006	216.114	Unkwnown	0.00343786	0.0634416	0.81722	0.039527
80.049	137.06	57.011	217.109	Unkwnown	0.00234267	0.694255	0.87068	0.0400245
87.08	137.06	49.98	224.14	Unkwnown	0.00498283	0.281083	0.816282	0.04354
97.04	137.06	40.02	234.1	Unkwnown	-0.000791315	0.259676	0.837646	0.04852
107.049	137.06	30.011	244.109	Unkwnown	0.00872629	0.0842823	0.834627	0.0535245
108.057	137.06	29.003	245.117	Unkwnown	0.00444155	0.537009	0.828861	0.0540285
108.081	137.06	28.979	245.141	Unkwnown	0.00728409	0.344853	0.849994	0.0540405
108.093	137.06	28.967	245.153	Unkwnown	0.00888077	0.329741	0.829268	0.0540465
125.06	137.06	12	262.12	C	0.00188062	0.665929	0.810848	0.06253
125.071	137.06	11.989	262.131	C	0.000471741	0.569469	0.846233	0.0625355
129.07	137.06	7.99	266.13	Unkwnown	0.000514356	0.680829	0.804837	0.064535
129.091	137.06	7.969	266.151	Unkwnown	0.00196532	0.70012	0.827149	0.0645455
129.127	137.06	7.933	266.187	Unkwnown	0.00502124	1.27451	0.82042	0.0645635
137.047	137.06	0.013	274.107	Resolution	-0.000904057	1.38847	0.958216	0.0685235
80.049	137.071	57.022	217.12	Unkwnown	0.00120405	1.14915	0.828616	0.0400245
81.07	137.071	56.001	218.141	Unkwnown	0.00590734	0.0375561	0.94996	0.040535
82.078	137.071	54.993	219.149	Unkwnown	0.00133554	0.510813	0.946518	0.041039
107.049	137.071	30.022	244.12	Unkwnown	0.011192	0.147968	0.840965	0.0535245
108.057	137.071	29.014	245.128	Unkwnown	0.00271052	0.994054	0.882175	0.0540285
108.081	137.071	28.99	245.152	Unkwnown	0.00872399	0.602373	0.853401	0.0540405
108.093	137.071	28.978	245.164	Unkwnown	0.0116869	0.565748	0.817566	0.0540465
110.06	137.071	27.011	247.131	Unkwnown	-0.00388166	2.80172	0.849086	0.05503
135.08	137.071	1.991	272.151	Isotope-2	0.016837	0.0680795	0.854457	0.06754
135.117	137.071	1.954	272.188	Isotope-2	0.0174607	0.038222	0.850435	0.0675585
137.06	137.071	0.011	274.131	Resolution	-0.00183327	1.59723	0.918117	0.06853
81.07	137.132	56.062	218.202	Unkwnown	-0.0281545	0.404123	0.983773	0.040535
82.078	137.132	55.054	219.21	Unkwnown	-0.0735777	5.40014	0.976004	0.041039
95.086	137.132	42.046	232.218	Unkwnown	-0.125052	0.72973	0.824473	0.047543
135.08	137.132	2.052	272.212	Isotope-2	0.0882378	0.751105	0.897292	0.06754
135.117	137.132	2.015	272.249	Isotope-2	0.0948278	0.424581	0.897596	0.0675585
137.071	137.132	0.061	274.203	Resolution	-0.0628643	9.40622	0.917501	0.0685355
57.07	139.148	82.078	196.218	Unkwnown	-0.0101713	0.0731306	0.897223	0.028535
68.049	139.148	71.099	207.197	Unkwnown	0.0107936	2.25893	0.830195	0.0340245
69.07	139.148	70.078	208.218	Unkwnown	0.00195803	0.0902342	0.877432	0.034535
71.086	139.148	68.062	210.234	Unkwnown	-0.0124514	0.152798	0.922714	0.035543
83	139.148	56.148	222.148	Unkwnown	0.0032127	0.103775	0.869602	0.0415
83.086	139.148	56.062	222.234	Unkwnown	0.00881173	0.125474	0.885157	0.041543
84.081	139.148	55.067	223.229	Unkwnown	0.00118673	1.63405	0.893437	0.0420405
85.101	139.148	54.047	224.249	Unkwnown	-0.00817717	0.233016	0.9245	0.0425505
86.096	139.148	53.052	225.244	Unkwnown	-0.0101674	3.22272	0.902898	0.043048
96.057	139.148	43.091	235.205	Unkwnown	0.0113542	1.57145	0.831553	0.0480285
97.065	139.148	42.083	236.213	Unkwnown	0.0021278	0.492518	0.862002	0.0485325
97.101	139.148	42.047	236.249	Unkwnown	0.00130402	0.173166	0.947057	0.0485505
99.09	139.15	40.06	238.24	Unkwnown	0.02	0.4	0.84	0.05
99.104	139.148	40.044	238.252	Unkwnown	0.0122037	0.426412	0.901706	0.049552
99.117	139.148	40.031	238.265	Unkwnown	0.00675496	0.499251	0.933513	0.0495585
109.065	139.148	30.083	248.213	Unkwnown	0.0125766	0.370608	0.832871	0.0545325
109.076	139.148	30.072	248.224	Unkwnown	0.0105532	0.217871	0.872601	0.054538
109.089	139.148	30.059	248.237	Unkwnown	0.0105037	0.176515	0.879472	0.0545445
109.101	139.148	30.047	248.249	Unkwnown	0.0112551	0.165487	0.872534	0.0545505
110.073	139.148	29.075	249.221	Unkwnown	0.0153556	2.11945	0.809777	0.0550365
110.084	139.148	29.064	249.232	Unkwnown	0.0148106	1.48683	0.832628	0.055042
110.109	139.148	29.039	249.257	Unkwnown	0.015537	1.27959	0.83781	0.0550545
111.092	139.148	28.056	250.24	C2H4	0.00511886	0.244774	0.937266	0.055546
111.104	139.148	28.044	250.252	C2H4	0.00298284	0.239061	0.960441	0.055552
111.117	139.148	28.031	250.265	C2H4	0.00416117	0.235197	0.950364	0.0555585
112.088	139.148	27.06	251.236	Unkwnown	0.00556629	2.5489	0.916737	0.056044
112.112	139.148	27.036	251.26	Unkwnown	0.003884	2.1898	0.957665	0.056056
113.096	139.148	26.052	252.244	C2H2	-0.00201467	1.35435	0.877802	0.056548
113.107	139.148	26.041	252.255	C2H2	-0.00259648	1.0119	0.94159	0.0565535
123.092	139.148	16.056	262.24	Unkwnown	0.00494312	0.298427	0.850763	0.061546
125.096	139.148	14.052	264.244	CH2	-0.00615979	0.850782	0.970355	0.062548
125.107	139.148	14.041	264.255	CH2	-0.0021603	0.570656	0.980871	0.0625535
125.12	139.148	14.028	264.268	CH2	0.000482154	0.481105	0.974272	0.06256
127.112	139.148	12.036	266.26	C	-0.0047612	1.42263	0.846171	0.063556
127.136	139.148	12.012	266.284	C	-0.0073336	1.04	0.910078	0.063568
128.12	139.148	11.028	267.268	Unkwnown	0.0127706	7.40504	0.801895	0.06406
128.143	139.148	11.005	267.291	Unkwnown	0.00950609	7.73736	0.877336	0.0640715
116.143	144.175	28.032	260.318	C2H4	8.07e-22	1.32118	1	0.0580715
127.903	144.175	16.272	272.078	Unkwnown	8.29e-22	4.54944	1	0.0639515
128.911	144.175	15.264	273.086	Unkwnown	-2.87e-08	0.517391	0.877016	0.0644555
131.06	145.076	14.016	276.136	CH2	0.00058884	0.99106	0.827822	0.06553
145.076	145.122	0.046	290.198	Resolution	-0.00186304	1.59692	0.934453	0.072538
116.143	145.962	29.819	262.105	Unkwnown	1.84e-21	0.3033	1	0.0580715
127.903	145.962	18.059	273.865	H2O	1.84e-21	1.04441	1	0.0639515
128.911	145.962	17.051	274.873	Unkwnown	-6.59e-09	0.118776	0.877016	0.0644555
144.175	145.962	1.787	290.137	Unkwnown	1.85e-21	0.229568	1	0.0720875
116.143	145.968	29.825	262.111	Unkwnown	2.46e-21	0.424583	1	0.0580715
127.903	145.968	18.065	273.871	H2O	2.46e-21	1.46204	1	0.0639515
128.911	145.968	17.057	274.879	Unkwnown	-9.23e-09	0.166272	0.877016	0.0644555
144.175	145.968	1.793	290.143	Unkwnown	2.46e-21	0.321366	1	0.0720875
145.962	145.968	0.006	291.93	Resolution	2.46e-21	1.39988	1	0.072981
146.97	146.976	0.006	293.946	Resolution	0.000210536	1.01403	0.995779	0.073485
132.066	148.088	16.022	280.154	Unkwnown	0.000218294	0.868506	0.812248	0.066033
133.101	148.088	14.987	281.189	Unkwnown	-0.000943961	0.0988683	0.809612	0.0665505
57.07	149.096	92.026	206.166	Unkwnown	-0.00869649	0.0609579	0.849811	0.028535
69.07	149.096	80.026	218.166	Unkwnown	0.00261335	0.0733338	0.808472	0.034535
95.086	149.096	54.01	244.182	Unkwnown	0.00726774	0.117018	0.914881	0.047543
96.057	149.096	53.039	245.153	Unkwnown	0.00312482	1.50967	0.908806	0.0480285
97.101	149.096	51.995	246.197	Unkwnown	0.0035243	0.136441	0.848877	0.0485505
109.065	149.096	40.031	258.161	Unkwnown	0.00317945	0.364882	0.931462	0.0545325
109.076	149.096	40.02	258.172	Unkwnown	0.00238494	0.209174	0.95093	0.054538
109.089	149.096	40.007	258.185	Unkwnown	0.0024682	0.168997	0.955332	0.0545445
109.101	149.096	39.995	258.197	Unkwnown	0.00254644	0.160639	0.96078	0.0545505
110.06	149.096	39.036	259.156	Unkwnown	0.0121719	4.13848	0.835033	0.05503
110.073	149.096	39.023	259.169	Unkwnown	0.00488527	2.13617	0.928659	0.0550365
110.084	149.096	39.012	259.18	Unkwnown	0.00524589	1.46828	0.935503	0.055042
110.109	149.096	38.987	259.205	Unkwnown	0.00543056	1.27914	0.952793	0.0550545
111.104	149.096	37.992	260.2	Unkwnown	0.00598143	0.183563	0.840086	0.055552
111.117	149.096	37.979	260.213	Unkwnown	0.00622997	0.183385	0.843823	0.0555585
112.112	149.096	36.984	261.208	Unkwnown	0.00517745	1.74033	0.866883	0.056056
123.092	149.096	26.004	272.188	C2H2	-0.00505632	0.297755	0.964093	0.061546
125.096	149.096	24	274.192	Unkwnown	0.00107879	0.625834	0.813246	0.062548
125.107	149.096	23.989	274.203	Unkwnown	0.00417308	0.418365	0.819661	0.0625535
125.12	149.096	23.976	274.216	Unkwnown	0.00628967	0.35125	0.810978	0.06256
139.148	149.096	9.948	288.244	Unkwnown	0.00713944	0.709893	0.8094	0.069574
82.078	151.075	68.997	233.153	Unkwnown	0.0107288	0.403609	0.802439	0.041039
95.086	151.075	55.989	246.161	Unkwnown	0.00269353	0.066178	0.818672	0.047543
108.057	151.075	43.018	259.132	Unkwnown	0.00930183	0.919779	0.872155	0.0540285
108.081	151.075	42.994	259.156	Unkwnown	0.0153476	0.534306	0.807587	0.0540405
110.06	151.075	41.015	261.135	Unkwnown	0.00185113	2.74266	0.888285	0.05503
110.073	151.075	41.002	261.148	Unkwnown	0.000956041	1.22681	0.855763	0.0550365
110.084	151.075	40.991	261.159	Unkwnown	0.00163274	0.82762	0.845577	0.055042
110.109	151.075	40.966	261.184	Unkwnown	0.00334366	0.674237	0.805461	0.0550545
137.06	151.075	14.015	288.135	CH2	0.00741372	1.31802	0.808374	0.06853
137.071	151.075	14.004	288.146	CH2	0.00995506	0.776916	0.830741	0.0685355
57.07	152.12	95.05	209.19	Unkwnown	-0.00324031	0.0132341	0.830901	0.028535
68.049	152.12	84.071	220.169	Unkwnown	-0.000489201	0.457151	0.86062	0.0340245
69.07	152.12	83.05	221.19	Unkwnown	-0.00125651	0.0166605	0.824141	0.034535
95.086	152.12	57.034	247.206	Unkwnown	0.000153189	0.025606	0.893823	0.047543
96.057	152.12	56.063	248.177	Unkwnown	5.57e-05	0.30394	0.82411	0.0480285
97.065	152.12	55.055	249.185	Unkwnown	-0.00176251	0.0955495	0.854234	0.0485325
108.057	152.12	44.063	260.177	Unkwnown	0.00351961	0.312616	0.832391	0.0540285
109.065	152.12	43.055	261.185	Unkwnown	-0.000466411	0.077672	0.89124	0.0545325
109.076	152.12	43.044	261.196	Unkwnown	-0.000581597	0.0442866	0.903912	0.054538
109.089	152.12	43.031	261.209	Unkwnown	-0.000444611	0.0353503	0.896904	0.0545445
109.101	152.12	43.019	261.221	Unkwnown	-0.000202616	0.0328279	0.881527	0.0545505
110.06	152.12	42.06	262.18	Unkwnown	0.000268083	1.01217	0.919265	0.05503
110.073	152.12	42.047	262.193	Unkwnown	-0.000562326	0.476762	0.932626	0.0550365
110.084	152.12	42.036	262.204	Unkwnown	-0.000425104	0.325812	0.933771	0.055042
110.109	152.12	42.011	262.229	Unkwnown	4.04e-05	0.271483	0.909671	0.0550545
123.092	152.12	29.028	275.212	Unkwnown	-0.00142458	0.0590344	0.860328	0.061546
139.148	152.12	12.972	291.268	Unkwnown	-6.89e-05	0.1586	0.813372	0.069574
149.096	152.12	3.024	301.216	Isotope-3	0.000166897	0.186337	0.83936	0.074548
151.075	152.12	1.045	303.195	Isotope-1	0.000458375	0.336098	0.944456	0.0755375
33.033	153.055	120.022	186.088	Unkwnown	0.00425287	0.0037085	0.816058	0.0165165
33.045	153.055	120.01	186.1	Unkwnown	0.00459529	0.00487831	0.806741	0.0165225
45.033	153.055	108.022	198.088	Unkwnown	0.00169762	0.00968382	0.827038	0.0225165
87.044	153.055	66.011	240.099	Unkwnown	0.000213695	0.195978	0.804135	0.043522
87.08	153.055	65.975	240.135	Unkwnown	0.00313042	0.35749	0.872189	0.04354
97.04	153.055	56.015	250.095	Unkwnown	-0.00283396	0.306821	0.832335	0.04852
115.075	153.055	37.98	268.13	Unkwnown	0.00193743	0.554958	0.843425	0.0575375
115.112	153.055	37.943	268.167	Unkwnown	0.000991793	1.1213	0.853617	0.057556
115.123	153.055	37.932	268.178	Unkwnown	0.00125184	1.78832	0.854746	0.0575615
125.042	153.055	28.013	278.097	C2H4	-0.00148349	1.27691	0.846436	0.062521
125.06	153.055	27.995	278.115	C2H4	-0.00150317	0.883295	0.904408	0.06253
125.071	153.055	27.984	278.126	C2H4	-0.00265417	0.726188	0.907425	0.0625355
129.07	153.055	23.985	282.125	Unkwnown	-0.00202035	0.839959	0.834444	0.064535
129.091	153.055	23.964	282.146	Unkwnown	-6.08e-05	0.854282	0.848214	0.0645455
129.127	153.055	23.928	282.182	Unkwnown	0.00423293	1.4791	0.800326	0.0645635
137.047	153.055	16.008	290.102	Unkwnown	-0.000793133	1.44443	0.838245	0.0685235
53.026	153.07	100.044	206.096	Unkwnown	-0.00391658	0.522216	0.858296	0.026513
87.08	153.07	65.99	240.15	Unkwnown	0.000337642	0.535269	0.863919	0.04354
97.04	153.07	56.03	250.11	Unkwnown	-0.00851723	0.458118	0.820914	0.04852
107.049	153.07	46.021	260.119	Unkwnown	0.00808387	0.151466	0.830777	0.0535245
107.086	153.07	45.984	260.156	Unkwnown	0.0118761	0.0578802	0.811041	0.053543
108.093	153.07	44.977	261.163	Unkwnown	0.00854233	0.581952	0.812507	0.0540465
125.06	153.07	28.01	278.13	C2H4	-0.00468035	1.22115	0.82742	0.06253
125.071	153.07	27.999	278.141	C2H4	-0.00662886	1.01846	0.841863	0.0625355
129.127	153.07	23.943	282.197	Unkwnown	0.00180798	2.23895	0.801994	0.0645635
137.047	153.07	16.023	290.117	Unkwnown	-0.00600265	2.20474	0.846302	0.0685235
137.06	153.07	16.01	290.13	Unkwnown	-0.00506743	1.62243	0.901813	0.06853
137.071	153.07	15.999	290.141	Unkwnown	0.000587448	0.837777	0.80997	0.0685355
153.055	153.07	0.015	306.125	Resolution	-0.00244405	1.3721	0.908552	0.0765275
81.07	153.127	72.057	234.197	Unkwnown	-0.0122853	0.126412	0.908904	0.040535
82.078	153.127	71.049	235.205	Unkwnown	-0.0249016	1.64847	0.894381	0.041039
107.049	153.127	46.078	260.176	Unkwnown	0.00461296	0.51107	0.841829	0.0535245
107.086	153.127	46.041	260.213	Unkwnown	0.0173361	0.195936	0.811936	0.053543
108.081	153.127	45.046	261.208	Unkwnown	-0.00270266	2.02268	0.837958	0.0540405
108.093	153.127	45.034	261.22	Unkwnown	0.00612895	1.96542	0.829978	0.0540465
135.08	153.127	18.047	288.207	H2O	0.0215403	0.274284	0.982595	0.06754
135.117	153.127	18.01	288.244	H2O	0.0238268	0.156238	0.981355	0.0675585
137.06	153.127	16.067	290.187	Unkwnown	-0.0290274	4.73343	0.800043	0.06853
137.071	153.127	16.056	290.198	Unkwnown	-0.0261701	3.08441	0.90628	0.0685355
137.132	153.127	15.995	290.259	Unkwnown	-0.00237604	0.304792	0.908481	0.068566
81.07	153.151	72.081	234.221	Unkwnown	-0.00512611	0.111073	0.922344	0.040535
82.078	153.151	71.073	235.229	Unkwnown	-0.0171372	1.47212	0.919371	0.041039
107.049	153.151	46.102	260.2	Unkwnown	0.0112307	0.426983	0.806889	0.0535245
108.081	153.151	45.07	261.232	Unkwnown	0.00466729	1.7115	0.814376	0.0540405
135.08	153.151	18.071	288.231	H2O	0.0250029	0.234792	0.966496	0.06754
135.117	153.151	18.034	288.268	H2O	0.0269579	0.133766	0.96523	0.0675585
137.071	153.151	16.08	290.222	Unkwnown	-0.0167131	2.68137	0.905327	0.0685355
137.132	153.151	16.019	290.283	Unkwnown	0.00331624	0.269732	0.927374	0.068566
153.127	153.151	0.024	306.278	Resolution	0.00632725	0.862004	0.991468	0.0765635
116.143	153.98	37.837	270.123	Unkwnown	3.8e-21	0.613121	1	0.0580715
127.903	153.98	26.077	281.883	C2H2	3.81e-21	2.11126	1	0.0639515
128.911	153.98	25.069	282.891	Unkwnown	-1.33e-08	0.240106	0.877016	0.0644555
144.175	153.98	9.805	298.155	Unkwnown	3.81e-21	0.464071	1	0.0720875
145.962	153.98	8.018	299.942	Unkwnown	3.8e-21	2.0215	1	0.072981
145.968	153.98	8.012	299.948	Unkwnown	3.81e-21	1.44406	1	0.072984
86.036	155.086	69.05	241.122	Unkwnown	0.00317355	1.45964	0.831476	0.043018
86.06	155.086	69.026	241.146	Unkwnown	0.00231883	1.06617	0.839061	0.04303
105.037	155.086	50.049	260.123	Unkwnown	0.00319078	0.186794	0.815194	0.0525185
114.091	155.086	40.995	269.177	Unkwnown	0.0060444	0.202836	0.836253	0.0570455
114.128	155.086	40.958	269.214	Unkwnown	0.00398682	0.549477	0.834431	0.057064
115.112	155.086	39.974	270.198	Unkwnown	0.0073002	0.995133	0.843179	0.057556
115.123	155.086	39.963	270.209	Unkwnown	0.00759552	1.57884	0.83983	0.0575615
122.06	155.086	33.026	277.146	Unkwnown	0.00274842	0.804504	0.889505	0.06103
122.084	155.086	33.002	277.17	Unkwnown	0.00612557	0.65407	0.831481	0.061042
124.039	155.086	31.047	279.125	Unkwnown	0.00222811	1.52917	0.815685	0.0620195
124.057	155.086	31.029	279.143	Unkwnown	0.000980789	1.46249	0.852632	0.0620285
125.042	155.086	30.044	280.128	Unkwnown	0.00549465	1.10333	0.813822	0.062521
125.06	155.086	30.026	280.146	Unkwnown	0.00626561	0.721599	0.822368	0.06253
125.071	155.086	30.015	280.157	Unkwnown	0.00552107	0.585298	0.814192	0.0625355
129.045	155.086	26.041	284.131	C2H2	0.00309807	1.07956	0.811552	0.0645225
129.07	155.086	26.016	284.156	C2H2	0.0045438	0.749502	0.828619	0.064535
129.091	155.086	25.995	284.177	C2H2	0.0066016	0.744994	0.823182	0.0645455
137.047	155.086	18.039	292.133	H2O	0.0051681	1.33134	0.859942	0.0685235
137.06	155.086	18.026	292.146	H2O	0.00754336	0.854744	0.800739	0.06853
86.036	155.107	69.071	241.143	Unkwnown	0.00340069	1.46371	0.808524	0.043018
86.06	155.107	69.047	241.167	Unkwnown	0.0024927	1.07223	0.818264	0.04303
114.091	155.107	41.016	269.198	Unkwnown	0.00649286	0.200285	0.800816	0.0570455
114.128	155.107	40.979	269.235	Unkwnown	0.00435198	0.546329	0.804601	0.057064
115.112	155.107	39.995	270.219	Unkwnown	0.00723129	1.02215	0.839813	0.057556
115.123	155.107	39.984	270.23	Unkwnown	0.00743322	1.63469	0.843198	0.0575615
122.06	155.107	33.047	277.167	Unkwnown	0.00269595	0.819787	0.87899	0.06103
122.084	155.107	33.023	277.191	Unkwnown	0.00584687	0.680257	0.838544	0.061042
124.057	155.107	31.05	279.164	Unkwnown	0.00145182	1.44727	0.818189	0.0620285
125.042	155.107	30.065	280.149	Unkwnown	0.00534553	1.13566	0.812213	0.062521
125.06	155.107	30.047	280.167	Unkwnown	0.00593432	0.753563	0.832632	0.06253
125.071	155.107	30.036	280.178	Unkwnown	0.00497126	0.618764	0.834502	0.0625355
129.045	155.107	26.062	284.152	C2H2	0.00269294	1.12312	0.818759	0.0645225
129.07	155.107	26.037	284.177	C2H2	0.00409147	0.784884	0.841466	0.064535
129.091	155.107	26.016	284.198	C2H2	0.00612845	0.786759	0.842974	0.0645455
137.047	155.107	18.06	292.154	H2O	0.00440665	1.42474	0.892295	0.0685235
137.06	155.107	18.047	292.167	H2O	0.00662287	0.937182	0.851148	0.06853
155.086	155.107	0.021	310.193	Resolution	-0.000180394	1.0228	0.99175	0.077543
57.07	155.142	98.072	212.212	Unkwnown	-0.00134394	0.0296169	0.871162	0.028535
68.049	155.142	87.093	223.191	Unkwnown	0.0068379	0.92915	0.823626	0.0340245
69.07	155.142	86.072	224.212	Unkwnown	0.00442154	0.0352057	0.819331	0.034535
71.086	155.142	84.056	226.228	Unkwnown	-0.00137074	0.059977	0.870079	0.035543
83	155.142	72.142	238.142	Unkwnown	0.00451975	0.0412103	0.827937	0.0415
83.086	155.142	72.056	238.228	Unkwnown	0.00766077	0.0475557	0.804665	0.041543
84.081	155.142	71.061	239.223	Unkwnown	0.00358489	0.652549	0.860532	0.0420405
85.101	155.142	70.041	240.243	Unkwnown	0.000728624	0.0900133	0.858898	0.0425505
86.096	155.142	69.046	241.238	Unkwnown	-0.00182819	1.32764	0.897488	0.043048
99.09	155.14	56.05	254.23	Unkwnown	0.01	0.16	0.83	0.05
99.104	155.142	56.038	254.246	Unkwnown	0.00805887	0.169615	0.864896	0.049552
99.117	155.142	56.025	254.259	Unkwnown	0.00659991	0.191883	0.864605	0.0495585
112.088	155.142	43.054	267.23	Unkwnown	0.00713246	0.932891	0.80934	0.056044
112.112	155.142	43.03	267.254	Unkwnown	0.00711968	0.777722	0.820065	0.056056
113.096	155.142	42.046	268.238	Unkwnown	0.000185039	0.587559	0.918735	0.056548
113.107	155.142	42.035	268.249	Unkwnown	0.0013987	0.415103	0.931676	0.0565535
125.084	155.142	30.058	280.226	Unkwnown	0.0040587	0.576827	0.810561	0.062542
125.096	155.142	30.046	280.238	Unkwnown	0.00235598	0.317665	0.873202	0.062548
125.107	155.142	30.035	280.249	Unkwnown	0.00465025	0.205659	0.851309	0.0625535
125.12	155.142	30.022	280.262	Unkwnown	0.00597559	0.170345	0.83031	0.06256
127.112	155.142	28.03	282.254	C2H4	-0.00231124	0.646066	0.927702	0.063556
127.136	155.142	28.006	282.278	C2H4	-0.00186613	0.447194	0.944636	0.063568
128.12	155.142	27.022	283.262	Unkwnown	0.00466664	3.5188	0.920129	0.06406
128.143	155.142	26.999	283.285	Unkwnown	0.00496818	3.38997	0.928033	0.0640715
139.148	155.142	15.994	294.29	Unkwnown	0.00469078	0.372795	0.898844	0.069574
84.081	157.159	73.078	241.24	Unkwnown	-0.00191864	0.249521	0.817004	0.0420405
113.096	157.159	44.063	270.255	Unkwnown	-0.00239946	0.206634	0.802886	0.056548
127.112	157.159	30.047	284.271	Unkwnown	-0.00385558	0.24001	0.856569	0.063556
128.12	157.159	29.039	285.279	Unkwnown	-0.00078375	1.23122	0.800178	0.06406
131.06	157.159	26.099	288.219	Unkwnown	0.00143216	0.803136	0.850117	0.06553
145.076	157.159	12.083	302.235	C	0.00201701	0.667677	0.847297	0.072538
155.142	157.159	2.017	312.301	Isotope-2	-0.00173038	0.324362	0.806295	0.077571
133.101	161.132	28.031	294.233	C2H4	0.00263394	0.315945	0.82113	0.0665505
145.076	161.132	16.056	306.208	Unkwnown	0.0012715	0.869877	0.889576	0.072538
114.128	162.128	48	276.256	Unkwnown	-0.00246037	0.147967	0.812996	0.057064
161.132	162.128	0.996	323.26	Isotope-1	-0.00125709	0.398837	0.83116	0.080566
163.063	163.075	0.012	326.138	Resolution	0.00025781	1.16266	0.977817	0.0815315
84.081	163.099	79.018	247.18	Unkwnown	6.2e-05	0.484559	0.80256	0.0420405
163.063	163.099	0.036	326.162	Resolution	0.00564084	1.49248	0.8209	0.0815315
163.075	163.099	0.024	326.174	Resolution	0.00443288	1.37715	0.900706	0.0815375
57.07	163.123	106.053	220.193	Unkwnown	-0.00577117	0.0305435	0.842802	0.028535
71.086	163.123	92.037	234.209	Unkwnown	-0.00445875	0.0590076	0.805927	0.035543
83	163.123	80.123	246.123	Unkwnown	-0.00090727	0.044681	0.832389	0.0415
83.086	163.123	80.037	246.209	Unkwnown	0.000608683	0.0562382	0.880235	0.041543
84.081	163.123	79.042	247.204	Unkwnown	-0.00201754	0.710215	0.878863	0.0420405
86.096	163.123	77.027	249.219	Unkwnown	-0.00441689	1.28342	0.816173	0.043048
99.117	163.123	64.006	262.24	Unkwnown	0.00337883	0.188822	0.800169	0.0495585
113.107	163.123	50.016	276.23	Unkwnown	-0.000664057	0.390957	0.825492	0.0565535
125.096	163.123	38.027	288.219	Unkwnown	-0.000739221	0.311843	0.805947	0.062548
127.112	163.123	36.011	290.235	Unkwnown	-0.0034699	0.593248	0.801199	0.063556
127.136	163.123	35.987	290.259	Unkwnown	-0.00373344	0.421095	0.836705	0.063568
128.12	163.123	35.003	291.243	Unkwnown	0.00214874	3.35612	0.825361	0.06406
128.143	163.123	34.98	291.266	Unkwnown	0.00230852	3.25302	0.837555	0.0640715
139.148	163.123	23.975	302.271	Unkwnown	0.00227216	0.353872	0.802507	0.069574
155.142	163.123	7.981	318.265	Unkwnown	-0.00106926	0.907889	0.853767	0.077571
163.099	163.123	0.024	326.222	Resolution	0.00117441	1.27653	0.953738	0.0815495
57.07	163.136	106.066	220.206	Unkwnown	-0.00624344	0.0314838	0.862789	0.028535
71.086	163.136	92.05	234.222	Unkwnown	-0.00529239	0.0616775	0.836038	0.035543
83	163.136	80.136	246.136	Unkwnown	-0.00107014	0.0457623	0.847194	0.0415
83.086	163.136	80.05	246.222	Unkwnown	0.000395227	0.0578152	0.899341	0.041543
84.081	163.136	79.055	247.217	Unkwnown	-0.00216302	0.726162	0.891657	0.0420405
85.101	163.136	78.035	248.237	Unkwnown	-0.00344502	0.0936379	0.834933	0.0425505
86.096	163.136	77.04	249.232	Unkwnown	-0.00513404	1.33619	0.842947	0.043048
97.101	163.136	66.035	260.237	Unkwnown	0.00171376	0.0655738	0.802843	0.0485505
99.104	163.136	64.032	262.24	Unkwnown	0.00432991	0.175097	0.831821	0.049552
99.117	163.136	64.019	262.253	Unkwnown	0.00268807	0.19937	0.838177	0.0495585
112.112	163.136	51.024	275.248	Unkwnown	0.00258829	0.833257	0.819921	0.056056
113.096	163.136	50.04	276.232	Unkwnown	-0.0011722	0.548729	0.800796	0.056548
113.107	163.136	50.029	276.243	Unkwnown	-0.0012649	0.407652	0.853878	0.0565535
123.092	163.136	40.044	286.228	Unkwnown	0.000444368	0.127488	0.817079	0.061546
125.096	163.136	38.04	288.232	Unkwnown	-0.00131052	0.324735	0.832809	0.062548
125.107	163.136	38.029	288.243	Unkwnown	0.000620072	0.214075	0.826943	0.0625535
125.12	163.136	38.016	288.256	Unkwnown	0.00176967	0.17919	0.815255	0.06256
127.112	163.136	36.024	290.248	Unkwnown	-0.00364225	0.606441	0.812461	0.063556
127.136	163.136	36	290.272	Unkwnown	-0.00431865	0.436793	0.860896	0.063568
128.12	163.136	35.016	291.256	Unkwnown	0.0021479	3.42338	0.835124	0.06406
128.143	163.136	34.993	291.279	Unkwnown	0.00199635	3.3669	0.859895	0.0640715
139.148	163.136	23.988	302.284	Unkwnown	0.00165283	0.371401	0.835663	0.069574
155.142	163.136	7.994	318.278	Unkwnown	-0.00134116	0.933771	0.871038	0.077571
163.099	163.136	0.037	326.235	Resolution	0.00214116	1.24523	0.923517	0.0815495
163.123	163.136	0.013	326.259	Resolution	0.000365882	1.00248	0.994927	0.0815615
57.07	163.148	106.078	220.218	Unkwnown	-0.00633435	0.031159	0.880081	0.028535
69.07	163.148	94.078	232.218	Unkwnown	0.000444019	0.0359212	0.802776	0.034535
71.086	163.148	92.062	234.234	Unkwnown	-0.00581562	0.0619384	0.86497	0.035543
83	163.148	80.148	246.148	Unkwnown	-0.00070148	0.0443445	0.847757	0.0415
83.086	163.148	80.062	246.234	Unkwnown	0.000636525	0.0562269	0.903378	0.041543
84.081	163.148	79.067	247.229	Unkwnown	-0.00177258	0.704003	0.890766	0.0420405
85.101	163.148	78.047	248.249	Unkwnown	-0.00409611	0.0945012	0.868016	0.0425505
86.096	163.148	77.052	249.244	Unkwnown	-0.00554522	1.33669	0.86854	0.043048
97.101	163.148	66.047	260.249	Unkwnown	0.00112083	0.0661469	0.834645	0.0485505
99.09	163.15	64.06	262.24	Unkwnown	0.01	0.17	0.81	0.05
99.104	163.148	64.044	262.252	Unkwnown	0.00399773	0.174482	0.853911	0.049552
99.117	163.148	64.031	262.265	Unkwnown	0.00214971	0.200676	0.869064	0.0495585
109.076	163.148	54.072	272.224	Unkwnown	0.00360634	0.0878862	0.815817	0.054538
109.089	163.148	54.059	272.237	Unkwnown	0.00354607	0.0713487	0.823509	0.0545445
109.101	163.148	54.047	272.249	Unkwnown	0.00374095	0.0672647	0.821287	0.0545505
111.104	163.148	52.044	274.252	Unkwnown	0.00252986	0.0880704	0.818076	0.055552
111.117	163.148	52.031	274.265	Unkwnown	0.00267067	0.0878932	0.820635	0.0555585
112.112	163.148	51.036	275.26	Unkwnown	0.00200789	0.840346	0.851748	0.056056
113.096	163.148	50.052	276.244	Unkwnown	-0.00120819	0.540707	0.812763	0.056548
113.107	163.148	50.041	276.255	Unkwnown	-0.0016141	0.406818	0.877698	0.0565535
123.092	163.148	40.056	286.24	Unkwnown	6.58e-05	0.127369	0.84096	0.061546
125.096	163.148	38.052	288.244	Unkwnown	-0.00158557	0.323111	0.853689	0.062548
125.107	163.148	38.041	288.255	Unkwnown	0.000136101	0.214848	0.855035	0.0625535
125.12	163.148	38.028	288.268	Unkwnown	0.00120542	0.180526	0.846195	0.06256
127.112	163.148	36.036	290.26	Unkwnown	-0.00346298	0.59361	0.819117	0.063556
127.136	163.148	36.012	290.284	Unkwnown	-0.00452699	0.433805	0.880598	0.063568
128.12	163.148	35.028	291.268	Unkwnown	0.00216195	3.35771	0.843636	0.06406
128.143	163.148	35.005	291.291	Unkwnown	0.00176674	3.34047	0.878701	0.0640715
139.148	163.148	24	302.296	Unkwnown	0.00123893	0.371628	0.861353	0.069574
149.096	163.148	14.052	312.244	CH2	0.00366016	0.398775	0.812836	0.074548
155.142	163.148	8.006	318.29	Unkwnown	-0.00137157	0.920004	0.88391	0.077571
163.099	163.148	0.049	326.247	Resolution	0.00318364	1.16209	0.888388	0.0815495
163.123	163.148	0.025	326.271	Resolution	0.000954924	0.960062	0.981992	0.0815615
163.136	163.148	0.012	326.284	Resolution	0.000413104	0.965751	0.995183	0.081568
68.049	165.091	97.042	233.14	Unkwnown	0.000272576	0.358374	0.828496	0.0340245
69.033	165.091	96.058	234.124	Unkwnown	-0.000179905	0.141832	0.842158	0.0345165
110.06	165.091	55.031	275.151	Unkwnown	0.00117438	0.759194	0.84695	0.05503
125.084	165.091	40.007	290.175	Unkwnown	-0.00157589	0.242116	0.886658	0.062542
137.047	165.091	28.044	302.138	C2H4	0.00130802	0.603659	0.881624	0.0685235
137.06	165.091	28.031	302.151	C2H4	0.00199853	0.414235	0.877016	0.06853
151.075	165.091	14.016	316.166	CH2	0.00137646	0.249857	0.862265	0.0755375
152.12	165.091	12.971	317.211	Unkwnown	0.00154231	0.689325	0.84659	0.07606
155.142	165.091	9.949	320.233	Unkwnown	-0.000442754	0.314175	0.820433	0.077571
116.143	165.985	49.842	282.128	Unkwnown	-4.25e-21	0.821435	1	0.0580715
127.903	165.985	38.082	293.888	Unkwnown	-4.25e-21	2.82859	1	0.0639515
128.911	165.985	37.074	294.896	Unkwnown	-1.79e-08	0.321685	0.877016	0.0644555
144.175	165.985	21.81	310.16	Unkwnown	-4.24e-21	0.621744	1	0.0720875
145.962	165.985	20.023	311.947	Unkwnown	-4.25e-21	2.70832	1	0.072981
145.968	165.985	20.017	311.953	Unkwnown	-4.25e-21	1.93469	1	0.072984
153.98	165.985	12.005	319.965	C	-4.26e-21	1.33976	1	0.07699
166.062	166.078	0.016	332.14	Resolution	2.89e-05	1.39111	0.944022	0.083031
57.07	166.135	109.065	223.205	Unkwnown	-0.00410491	0.0104023	0.877983	0.028535
69.07	166.135	97.065	235.205	Unkwnown	-0.00207077	0.0123509	0.826438	0.034535
71.086	166.135	95.049	237.221	Unkwnown	-0.00427295	0.0214024	0.891176	0.035543
83.086	166.135	83.049	249.221	Unkwnown	-0.00113993	0.0171923	0.836701	0.041543
84.081	166.135	82.054	250.216	Unkwnown	-0.00187456	0.215205	0.809884	0.0420405
85.101	166.135	81.034	251.236	Unkwnown	-0.00389186	0.0333879	0.913257	0.0425505
86.096	166.135	80.039	252.231	Unkwnown	-0.00390292	0.44909	0.866203	0.043048
96.057	166.135	70.078	262.192	Unkwnown	-0.00145601	0.237005	0.862468	0.0480285
97.101	166.135	69.034	263.236	Unkwnown	-0.00272143	0.0253719	0.953982	0.0485505
99.104	166.135	67.031	265.239	Unkwnown	-0.000631054	0.0580288	0.845393	0.049552
99.117	166.135	67.018	265.252	Unkwnown	-0.0016031	0.0701233	0.903415	0.0495585
109.065	166.135	57.07	275.2	Unkwnown	-0.0011854	0.0552137	0.85379	0.0545325
109.076	166.135	57.059	275.211	Unkwnown	-0.00153383	0.0326679	0.900594	0.054538
109.089	166.135	57.046	275.224	Unkwnown	-0.00158645	0.0266296	0.913182	0.0545445
109.101	166.135	57.034	275.236	Unkwnown	-0.00157416	0.0253127	0.918319	0.0545505
110.073	166.135	56.062	276.208	Unkwnown	-0.000726691	0.313613	0.824477	0.0550365
110.084	166.135	56.051	276.219	Unkwnown	-0.000809005	0.22006	0.848099	0.055042
110.109	166.135	56.026	276.244	Unkwnown	-0.000846121	0.193597	0.872284	0.0550545
111.092	166.135	55.043	277.227	Unkwnown	-0.00173919	0.0339584	0.894971	0.055546
111.104	166.135	55.031	277.239	Unkwnown	-0.00229341	0.0342567	0.946926	0.055552
111.117	166.135	55.018	277.252	Unkwnown	-0.00227131	0.0343267	0.954124	0.0555585
112.088	166.135	54.047	278.223	Unkwnown	-0.00171494	0.355406	0.879517	0.056044
112.112	166.135	54.023	278.247	Unkwnown	-0.0023605	0.321517	0.967228	0.056056
113.107	166.135	53.028	279.242	Unkwnown	-0.00259921	0.136957	0.877629	0.0565535
123.092	166.135	43.043	289.227	Unkwnown	-0.00279675	0.0470533	0.922107	0.061546
125.096	166.135	41.039	291.231	Unkwnown	-0.0031121	0.115547	0.906921	0.062548
125.107	166.135	41.028	291.242	Unkwnown	-0.00280373	0.0796753	0.942505	0.0625535
125.12	166.135	41.015	291.255	Unkwnown	-0.00253768	0.0680109	0.9479	0.06256
127.136	166.135	38.999	293.271	Unkwnown	-0.00316321	0.139559	0.841466	0.063568
128.143	166.135	37.992	294.278	Unkwnown	-0.00111808	1.07151	0.836619	0.0640715
139.148	166.135	26.987	305.283	Unkwnown	-0.00219017	0.134378	0.925221	0.069574
149.096	166.135	17.039	315.231	Unkwnown	-0.00157319	0.149429	0.903751	0.074548
155.142	166.135	10.993	321.277	Unkwnown	-0.0019004	0.286757	0.817885	0.077571
163.123	166.135	3.012	329.258	Isotope-3	-0.000392915	0.265706	0.808335	0.0815615
163.136	166.135	2.999	329.271	Isotope-3	-0.00072548	0.274969	0.842645	0.081568
163.148	166.135	2.987	329.283	Isotope-3	-0.00105407	0.293755	0.873306	0.081574
75.044	167.07	92.026	242.114	Unkwnown	0.0251346	0.0523475	0.825449	0.037522
75.068	167.07	92.002	242.138	Unkwnown	0.0354181	0.473943	0.844731	0.037534
93.033	167.07	74.037	260.103	Unkwnown	0.0350167	0.0381212	0.87319	0.0465165
94.041	167.07	73.029	261.111	Unkwnown	0.0267905	0.526458	0.882754	0.0470205
95.049	167.07	72.021	262.119	Unkwnown	-0.00250519	0.341308	0.92258	0.0475245
96.057	167.07	71.013	263.127	Unkwnown	-0.0335472	6.10868	0.905681	0.0480285
97.101	167.07	69.969	264.171	Unkwnown	-0.0363067	0.56511	0.868855	0.0485505
109.065	167.07	58.005	276.135	Unkwnown	-0.00931311	1.28679	0.812011	0.0545325
109.076	167.07	57.994	276.146	Unkwnown	-0.012655	0.740075	0.832823	0.054538
109.089	167.07	57.981	276.159	Unkwnown	-0.0127711	0.599406	0.839196	0.0545445
109.101	167.07	57.969	276.171	Unkwnown	-0.012789	0.570773	0.845361	0.0545505
111.08	167.07	55.99	278.15	Unkwnown	0.0134104	0.70929	0.833286	0.05554
111.092	167.07	55.978	278.162	Unkwnown	-0.0327068	0.838625	0.901246	0.055546
111.104	167.07	55.966	278.174	Unkwnown	-0.033168	0.79005	0.892044	0.055552
111.117	167.07	55.953	278.187	Unkwnown	-0.0276612	0.770425	0.875601	0.0555585
112.088	167.07	54.982	279.158	Unkwnown	-0.0341627	8.8741	0.895767	0.056044
112.112	167.07	54.958	279.182	Unkwnown	-0.0290165	7.19065	0.88385	0.056056
123.092	167.07	43.978	290.162	Unkwnown	-0.0425701	1.0731	0.858209	0.061546
125.096	167.07	41.974	292.166	Unkwnown	-0.0387778	2.49285	0.800318	0.062548
125.107	167.07	41.963	292.177	Unkwnown	-0.0333574	1.73035	0.837355	0.0625535
125.12	167.07	41.95	292.19	Unkwnown	-0.0277836	1.4787	0.843182	0.06256
139.148	167.07	27.922	306.218	C2H4	-0.0157804	2.8469	0.801638	0.069574
149.096	167.07	17.974	316.166	H2O	-0.0200898	3.51776	0.86662	0.074548
166.135	167.07	0.935	333.205	Isotope-1	0.0285963	21.5344	0.879283	0.0830675
75.044	167.086	92.042	242.13	Unkwnown	0.0263116	0.0404838	0.812954	0.037522
75.068	167.086	92.018	242.154	Unkwnown	0.0348725	0.364094	0.825777	0.037534
93.033	167.086	74.053	260.119	Unkwnown	0.0324486	0.0299657	0.873597	0.0465165
93.07	167.086	74.016	260.156	Unkwnown	0.0341851	0.0832093	0.806052	0.046535
94.041	167.086	73.045	261.127	Unkwnown	0.0259574	0.413932	0.883769	0.0470205
95.049	167.086	72.037	262.135	Unkwnown	0.00301391	0.268158	0.923237	0.0475245
96.057	167.086	71.029	263.143	Unkwnown	-0.0217101	4.81039	0.908334	0.0480285
97.101	167.086	69.985	264.187	Unkwnown	-0.02491	0.448062	0.876765	0.0485505
109.065	167.086	58.021	276.151	Unkwnown	-0.00261871	1.01324	0.814001	0.0545325
109.076	167.086	58.01	276.162	Unkwnown	-0.00593345	0.585792	0.839114	0.054538
109.089	167.086	57.997	276.175	Unkwnown	-0.00606333	0.474585	0.84575	0.0545445
109.101	167.086	57.985	276.187	Unkwnown	-0.0057047	0.450635	0.849563	0.0545505
110.109	167.086	56.977	277.195	Unkwnown	0.00821916	3.41855	0.80073	0.0550545
111.08	167.086	56.006	278.166	Unkwnown	0.0138642	0.565643	0.846095	0.05554
111.092	167.086	55.994	278.178	Unkwnown	-0.0226718	0.667699	0.913371	0.055546
111.104	167.086	55.982	278.19	Unkwnown	-0.0227324	0.627727	0.902043	0.055552
111.117	167.086	55.969	278.203	Unkwnown	-0.0180693	0.610911	0.88356	0.0555585
112.088	167.086	54.998	279.174	Unkwnown	-0.0238311	7.0654	0.908027	0.056044
112.112	167.086	54.974	279.198	Unkwnown	-0.0193243	5.70895	0.89319	0.056056
123.092	167.086	43.994	290.178	Unkwnown	-0.0284229	0.842889	0.858298	0.061546
125.096	167.086	41.99	292.182	Unkwnown	-0.02889	2.0027	0.818317	0.062548
125.107	167.086	41.979	292.193	Unkwnown	-0.0240835	1.38595	0.853529	0.0625535
125.12	167.086	41.966	292.206	Unkwnown	-0.0194073	1.18265	0.858165	0.06256
139.148	167.086	27.938	306.234	C2H4	-0.0114967	2.30533	0.826154	0.069574
149.096	167.086	17.99	316.182	H2O	-0.0103425	2.75453	0.864289	0.074548
166.135	167.086	0.951	333.221	Isotope-1	0.0267011	17.048	0.886208	0.0830675
167.07	167.086	0.016	334.156	Resolution	0.0054201	0.782828	0.997107	0.083535
145.076	174.14	29.064	319.216	Unkwnown	-0.00124838	0.211108	0.821291	0.072538
145.122	174.14	29.018	319.262	Unkwnown	-0.000903987	0.122408	0.815172	0.072561
99.104	175.148	76.044	274.252	Unkwnown	-0.00223659	0.0618129	0.802323	0.049552
113.107	175.148	62.041	288.255	Unkwnown	-0.00400418	0.140528	0.805136	0.0565535
127.112	175.148	48.036	302.26	Unkwnown	-0.00525118	0.21852	0.801306	0.063556
127.136	175.148	48.012	302.284	Unkwnown	-0.0053706	0.155456	0.838213	0.063568
128.143	175.148	47.005	303.291	Unkwnown	-0.00291629	1.16629	0.815632	0.0640715
133.101	175.148	42.047	308.249	Unkwnown	0.000533064	0.2526	0.836601	0.0665505
145.076	175.148	30.072	320.224	Unkwnown	-0.00036833	0.670226	0.873724	0.072538
155.142	175.148	20.006	330.29	Unkwnown	-0.00456423	0.341759	0.872818	0.077571
161.132	175.148	14.016	336.28	CH2	-0.000918706	0.715058	0.911393	0.080566
163.123	175.148	12.025	338.271	C	-0.00285113	0.320251	0.871441	0.0815615
163.136	175.148	12.012	338.284	C	-0.00305207	0.322999	0.885239	0.081568
163.148	175.148	12	338.296	C	-0.00318868	0.334387	0.889139	0.081574
174.14	175.148	1.008	349.288	Isotope-1	0.00383475	2.43203	0.813931	0.08707
57.07	178.123	121.053	235.193	Unkwnown	-0.00326732	0.00731932	0.873739	0.028535
69.07	178.123	109.053	247.193	Unkwnown	-0.00174039	0.00854039	0.80771	0.034535
71.086	178.123	107.037	249.209	Unkwnown	-0.00306324	0.0143748	0.848283	0.035543
83.086	178.123	95.037	261.209	Unkwnown	-0.00100415	0.011659	0.802487	0.041543
85.101	178.123	93.022	263.224	Unkwnown	-0.0027537	0.0222404	0.862455	0.0425505
86.096	178.123	92.027	264.219	Unkwnown	-0.00302119	0.311181	0.851614	0.043048
96.057	178.123	82.066	274.18	Unkwnown	-0.00114039	0.158176	0.816662	0.0480285
97.101	178.123	81.022	275.224	Unkwnown	-0.00175968	0.0162629	0.865534	0.0485505
99.117	178.123	79.006	277.24	Unkwnown	-0.00113622	0.0458313	0.837736	0.0495585
109.065	178.123	69.058	287.188	Unkwnown	-0.00105954	0.0376372	0.824922	0.0545325
109.076	178.123	69.047	287.199	Unkwnown	-0.00127085	0.0221519	0.864911	0.054538
109.089	178.123	69.034	287.212	Unkwnown	-0.0013059	0.0180551	0.876486	0.0545445
109.101	178.123	69.022	287.224	Unkwnown	-0.00129557	0.0171554	0.880818	0.0545505
110.073	178.123	68.05	288.196	Unkwnown	-0.000849044	0.218685	0.815639	0.0550365
110.084	178.123	68.039	288.207	Unkwnown	-0.000860289	0.151914	0.830579	0.055042
110.109	178.123	68.014	288.232	Unkwnown	-0.000847216	0.13252	0.846994	0.0550545
111.104	178.123	67.019	289.227	Unkwnown	-0.00139428	0.0215727	0.84482	0.055552
111.117	178.123	67.006	289.24	Unkwnown	-0.00138222	0.0216247	0.851269	0.0555585
112.112	178.123	66.011	290.235	Unkwnown	-0.00154864	0.206885	0.882914	0.056056
113.107	178.123	65.016	291.23	Unkwnown	-0.00199065	0.0928267	0.844041	0.0565535
123.092	178.123	55.031	301.215	Unkwnown	-0.00231931	0.0329572	0.915121	0.061546
125.096	178.123	53.027	303.219	Unkwnown	-0.00212379	0.0755363	0.840933	0.062548
125.107	178.123	53.016	303.23	Unkwnown	-0.00180792	0.0510284	0.856025	0.0625535
125.12	178.123	53.003	303.243	Unkwnown	-0.00158251	0.0431094	0.851949	0.06256
127.136	178.123	50.987	305.259	Unkwnown	-0.0025752	0.0977383	0.836395	0.063568
128.12	178.123	50.003	306.243	Unkwnown	-0.00115544	0.770339	0.815116	0.06406
128.143	178.123	49.98	306.266	Unkwnown	-0.0012742	0.77073	0.853918	0.0640715
139.148	178.123	38.975	317.271	Unkwnown	-0.00144705	0.0866022	0.845926	0.069574
149.096	178.123	29.027	327.219	Unkwnown	-0.0014661	0.104741	0.898511	0.074548
155.142	178.123	22.981	333.265	Unkwnown	-0.00189224	0.208322	0.843231	0.077571
163.123	178.123	15	341.246	Unkwnown	-0.000892567	0.197122	0.8509	0.0815615
163.136	178.123	14.987	341.259	Unkwnown	-0.00106901	0.201035	0.874107	0.081568
163.148	178.123	14.975	341.271	Unkwnown	-0.00125663	0.212516	0.896393	0.081574
166.135	178.123	11.988	344.258	C	-7.65e-05	0.651513	0.924379	0.0830675
167.07	178.123	11.053	345.193	Unkwnown	0.000134425	0.0232496	0.812086	0.083535
167.086	178.123	11.037	345.209	Unkwnown	-4.87e-05	0.0298759	0.819144	0.083543
122.06	179.086	57.026	301.146	Unkwnown	0.000486734	0.247644	0.851144	0.06103
155.086	179.086	24	334.172	Unkwnown	0.000317136	0.273876	0.851524	0.077543
155.107	179.086	23.979	334.193	Unkwnown	0.000403449	0.26589	0.852689	0.0775535
162.128	179.086	16.958	341.214	Unkwnown	0.00404238	0.94551	0.812489	0.081064
165.091	179.086	13.995	344.177	CH2	0.00110233	0.58404	0.803144	0.0825455
57.07	179.107	122.037	236.177	Unkwnown	-0.00174577	0.0124701	0.857353	0.028535
69.07	179.107	110.037	248.177	Unkwnown	0.000496939	0.0151131	0.821036	0.034535
83.086	179.107	96.021	262.193	Unkwnown	0.00161766	0.0210826	0.826637	0.041543
84.081	179.107	95.026	263.188	Unkwnown	0.000537817	0.268916	0.826864	0.0420405
86.096	179.107	93.011	265.203	Unkwnown	-0.000847586	0.508016	0.801632	0.043048
109.065	179.107	70.042	288.172	Unkwnown	0.00179346	0.0658785	0.832328	0.0545325
109.076	179.107	70.031	288.183	Unkwnown	0.0017915	0.0371361	0.835743	0.054538
109.089	179.107	70.018	288.196	Unkwnown	0.00184745	0.0298549	0.835183	0.0545445
109.101	179.107	70.006	288.208	Unkwnown	0.00192989	0.028143	0.832615	0.0545505
110.073	179.107	69.034	289.18	Unkwnown	0.00219545	0.381166	0.81979	0.0550365
110.084	179.107	69.023	289.191	Unkwnown	0.00237972	0.258002	0.813368	0.055042
110.109	179.107	68.998	289.216	Unkwnown	0.0025828	0.2198	0.810036	0.0550545
123.092	179.107	56.015	302.199	Unkwnown	7e-05	0.0550526	0.881357	0.061546
125.096	179.107	54.011	304.203	Unkwnown	0.000313221	0.127258	0.816529	0.062548
128.12	179.107	50.987	307.227	Unkwnown	0.00157061	1.35708	0.828031	0.06406
128.143	179.107	50.964	307.25	Unkwnown	0.00200024	1.2589	0.804315	0.0640715
149.096	179.107	30.011	328.203	Unkwnown	0.00158897	0.173063	0.856009	0.074548
155.142	179.107	23.965	334.249	Unkwnown	0.000647191	0.353055	0.824107	0.077571
163.099	179.107	16.008	342.206	Unkwnown	0.00248253	0.44093	0.820027	0.0815495
163.123	179.107	15.984	342.23	Unkwnown	0.00201082	0.348245	0.866305	0.0815615
163.136	179.107	15.971	342.243	Unkwnown	0.00184357	0.349075	0.874712	0.081568
163.148	179.107	15.959	342.255	Unkwnown	0.00167465	0.362294	0.880775	0.081574
166.135	179.107	12.972	345.242	Unkwnown	0.00425852	1.01217	0.828111	0.0830675
178.123	179.107	0.984	357.23	Isotope-1	0.00436528	1.55681	0.897685	0.0890615
57.07	179.128	122.058	236.198	Unkwnown	-0.00981984	0.0373954	0.863226	0.028535
69.07	179.128	110.058	248.198	Unkwnown	-0.00290235	0.0450199	0.824114	0.034535
71.086	179.128	108.042	250.214	Unkwnown	-0.0102374	0.0765439	0.871979	0.035543
83.086	179.128	96.042	262.214	Unkwnown	-7.41e-05	0.0640655	0.849135	0.041543
85.101	179.128	94.027	264.229	Unkwnown	-0.00882823	0.11925	0.892079	0.0425505
86.096	179.128	93.032	265.224	Unkwnown	-0.0085498	1.58929	0.837668	0.043048
95.049	179.128	84.079	274.177	Unkwnown	0.00568093	0.0440002	0.802084	0.0475245
96.057	179.128	83.071	275.185	Unkwnown	-0.000973348	0.874082	0.869136	0.0480285
97.101	179.128	82.027	276.229	Unkwnown	-0.00542269	0.0929251	0.955387	0.0485505
99.117	179.128	80.011	278.245	Unkwnown	-0.000113972	0.245348	0.864052	0.0495585
109.065	179.128	70.063	288.193	Unkwnown	-0.000243143	0.205745	0.869573	0.0545325
109.076	179.128	70.052	288.204	Unkwnown	-0.00118759	0.120156	0.905556	0.054538
109.089	179.128	70.039	288.217	Unkwnown	-0.0013675	0.0978978	0.917764	0.0545445
109.101	179.128	70.027	288.229	Unkwnown	-0.0014361	0.0934466	0.926724	0.0545505
110.073	179.128	69.055	289.201	Unkwnown	0.00189957	1.14782	0.824586	0.0550365
110.084	179.128	69.044	289.212	Unkwnown	0.00182577	0.797849	0.840303	0.055042
110.109	179.128	69.019	289.237	Unkwnown	0.00155258	0.705942	0.869214	0.0550545
111.092	179.128	68.036	290.22	Unkwnown	-0.00154182	0.123098	0.887488	0.055546
111.104	179.128	68.024	290.232	Unkwnown	-0.0036487	0.124593	0.941867	0.055552
111.117	179.128	68.011	290.245	Unkwnown	-0.00365253	0.125205	0.951627	0.0555585
112.088	179.128	67.04	291.216	Unkwnown	-0.00138325	1.28499	0.869128	0.056044
112.112	179.128	67.016	291.24	Unkwnown	-0.00379337	1.16546	0.958193	0.056056
113.107	179.128	66.021	292.235	Unkwnown	-0.00327659	0.47393	0.83008	0.0565535
123.092	179.128	56.036	302.22	Unkwnown	-0.0062637	0.175425	0.939307	0.061546
125.096	179.128	54.032	304.224	Unkwnown	-0.00630551	0.416091	0.892631	0.062548
125.107	179.128	54.021	304.235	Unkwnown	-0.00513166	0.286329	0.925901	0.0625535
125.12	179.128	54.008	304.248	Unkwnown	-0.00414118	0.244131	0.930232	0.06256
139.148	179.128	39.98	318.276	Unkwnown	-0.00218296	0.470414	0.885371	0.069574
149.096	179.128	30.032	328.224	Unkwnown	-0.00170101	0.557085	0.920421	0.074548
163.136	179.128	15.992	342.264	Unkwnown	0.00235289	0.987483	0.826518	0.081568
163.148	179.128	15.98	342.276	Unkwnown	0.00119026	1.0542	0.856072	0.081574
166.135	179.128	12.993	345.263	Unkwnown	0.00523462	3.54366	0.968305	0.0830675
167.07	179.128	12.058	346.198	C	0.00523851	0.133899	0.901981	0.083535
167.086	179.128	12.042	346.214	C	0.00444278	0.17	0.898497	0.083543
178.123	179.128	1.005	357.251	Isotope-1	0.00811145	4.77504	0.919299	0.0890615
179.107	179.128	0.021	358.235	Resolution	-0.000544197	2.60013	0.868169	0.0895535
116.143	179.929	63.786	296.072	Unkwnown	1.79e-21	0.423213	1	0.0580715
127.903	179.929	52.026	307.832	Unkwnown	1.79e-21	1.45732	1	0.0639515
128.911	179.929	51.018	308.84	Unkwnown	-9.2e-09	0.165736	0.877016	0.0644555
144.175	179.929	35.754	324.104	Unkwnown	1.8e-21	0.320329	1	0.0720875
145.962	179.929	33.967	325.891	Unkwnown	1.79e-21	1.39536	1	0.072981
145.968	179.929	33.961	325.897	Unkwnown	1.79e-21	0.996773	1	0.072984
153.98	179.929	25.949	333.909	C2H2	1.78e-21	0.69026	1	0.07699
165.985	179.929	13.944	345.914	CH2	1.76e-21	0.515211	1	0.0829925
180.081	180.093	0.012	360.174	Resolution	3.55e-05	1.96744	0.872278	0.0900405
57.07	180.151	123.081	237.221	Unkwnown	-0.00496027	0.0127752	0.833834	0.028535
71.086	180.151	109.065	251.237	Unkwnown	-0.0052993	0.0265664	0.855551	0.035543
83.086	180.151	97.065	263.237	Unkwnown	-0.0016584	0.0219545	0.824855	0.041543
85.101	180.151	95.05	265.252	Unkwnown	-0.00490815	0.0417258	0.882356	0.0425505
86.096	180.151	94.055	266.247	Unkwnown	-0.00475842	0.553674	0.824749	0.043048
95.049	180.151	85.102	275.2	Unkwnown	3.21e-05	0.0156943	0.808642	0.0475245
96.057	180.151	84.094	276.208	Unkwnown	-0.00212414	0.304682	0.856175	0.0480285
97.101	180.151	83.05	277.252	Unkwnown	-0.003804	0.0327749	0.952802	0.0485505
99.104	180.151	81.047	279.255	Unkwnown	-0.000746301	0.0717381	0.807484	0.049552
99.117	180.151	81.034	279.268	Unkwnown	-0.00206648	0.0878114	0.874179	0.0495585
109.065	180.151	71.086	289.216	Unkwnown	-0.00167708	0.0701967	0.838533	0.0545325
109.076	180.151	71.075	289.227	Unkwnown	-0.00214481	0.0416429	0.887143	0.054538
109.089	180.151	71.062	289.24	Unkwnown	-0.00224609	0.0340689	0.902945	0.0545445
109.101	180.151	71.05	289.252	Unkwnown	-0.00227402	0.0325338	0.912212	0.0545505
110.084	180.151	70.067	290.235	Unkwnown	-0.00109569	0.276354	0.822563	0.055042
110.109	180.151	70.042	290.26	Unkwnown	-0.00122908	0.245648	0.854814	0.0550545
111.092	180.151	69.059	291.243	Unkwnown	-0.00243036	0.043395	0.884183	0.055546
111.104	180.151	69.047	291.255	Unkwnown	-0.0032089	0.0440736	0.941826	0.055552
111.117	180.151	69.034	291.268	Unkwnown	-0.00323679	0.044403	0.954126	0.0555585
112.088	180.151	68.063	292.239	Unkwnown	-0.00230156	0.449546	0.859171	0.056044
112.112	180.151	68.039	292.263	Unkwnown	-0.00327222	0.412748	0.95896	0.056056
113.107	180.151	67.044	293.258	Unkwnown	-0.00304619	0.167142	0.827336	0.0565535
123.092	180.151	57.059	303.243	Unkwnown	-0.00380328	0.0602462	0.911874	0.061546
125.096	180.151	55.055	305.247	Unkwnown	-0.00395059	0.144621	0.876862	0.062548
125.107	180.151	55.044	305.258	Unkwnown	-0.00371725	0.101136	0.92436	0.0625535
125.12	180.151	55.031	305.271	Unkwnown	-0.00343776	0.0868044	0.93489	0.06256
139.148	180.151	41.003	319.299	Unkwnown	-0.00273309	0.167122	0.888898	0.069574
149.096	180.151	31.055	329.247	Unkwnown	-0.0023017	0.192644	0.899643	0.074548
163.136	180.151	17.015	343.287	Unkwnown	-0.000881827	0.340721	0.806199	0.081568
163.148	180.151	17.003	343.299	Unkwnown	-0.00131658	0.365181	0.838285	0.081574
166.135	180.151	14.016	346.286	CH2	-8.1e-05	1.25603	0.969909	0.0830675
167.07	180.151	13.081	347.221	Unkwnown	-4.71e-05	0.0472478	0.899542	0.083535
167.086	180.151	13.065	347.237	Unkwnown	-0.00036038	0.0602455	0.899893	0.083543
178.123	180.151	2.028	358.274	Isotope-2	0.00103579	1.66629	0.906735	0.0890615
179.107	180.151	1.044	359.258	Isotope-1	-0.00145089	0.854665	0.806863	0.0895535
179.128	180.151	1.023	359.279	Isotope-1	-0.00173297	0.346563	0.979569	0.089564
116.143	180.937	64.794	297.08	Unkwnown	5.26e-21	0.987766	1	0.0580715
127.903	180.937	53.034	308.84	Unkwnown	5.26e-21	3.40134	1	0.0639515
128.911	180.937	52.026	309.848	Unkwnown	-2.15e-08	0.386822	0.877016	0.0644555
144.175	180.937	36.762	325.112	Unkwnown	5.26e-21	0.74764	1	0.0720875
145.962	180.937	34.975	326.899	Unkwnown	5.23e-21	3.25673	1	0.072981
145.968	180.937	34.969	326.905	Unkwnown	5.26e-21	2.32644	1	0.072984
153.98	180.937	26.957	334.917	Unkwnown	5.26e-21	1.61105	1	0.07699
165.985	180.937	14.952	346.922	Unkwnown	5.21e-21	1.20249	1	0.0829925
179.929	180.937	1.008	360.866	Isotope-1	5.26e-21	2.33397	1	0.0899645
105.037	181.076	76.039	286.113	Unkwnown	0.00368249	0.262083	0.835347	0.0525185
114.091	181.076	66.985	295.167	Unkwnown	0.00546663	0.317022	0.953488	0.0570455
114.128	181.076	66.948	295.204	Unkwnown	0.00242236	0.852888	0.94492	0.057064
122.06	181.076	59.016	303.136	Unkwnown	0.00345488	1.11036	0.896009	0.06103
124.039	181.076	57.037	305.115	Unkwnown	0.00142145	2.22417	0.865485	0.0620195
124.057	181.076	57.019	305.133	Unkwnown	0.000513859	2.05719	0.875028	0.0620285
155.086	181.076	25.99	336.162	C2H2	0.00341785	1.19167	0.86954	0.077543
155.107	181.076	25.969	336.183	C2H2	0.00440107	1.12684	0.848088	0.0775535
105.037	181.101	76.064	286.138	Unkwnown	0.00281195	0.213887	0.802578	0.0525185
114.091	181.101	67.01	295.192	Unkwnown	0.00430841	0.258132	0.914146	0.0570455
114.128	181.101	66.973	295.229	Unkwnown	0.00187324	0.692954	0.90409	0.057064
122.06	181.101	59.041	303.161	Unkwnown	0.00214085	0.928899	0.88268	0.06103
124.039	181.101	57.062	305.14	Unkwnown	0.00101468	1.81101	0.829954	0.0620195
124.057	181.101	57.044	305.158	Unkwnown	9.84e-05	1.68873	0.845941	0.0620285
155.086	181.101	26.015	336.187	C2H2	0.000869187	1.05919	0.91008	0.077543
155.107	181.101	25.994	336.208	C2H2	0.00156437	1.01041	0.895444	0.0775535
181.076	181.101	0.025	362.177	Resolution	-0.000697342	0.834658	0.982761	0.090538
57.07	181.159	124.089	238.229	Unkwnown	-0.000280353	0.0148395	0.804403	0.028535
84.081	181.159	97.078	265.24	Unkwnown	0.00163952	0.342363	0.832295	0.0420405
86.096	181.159	95.063	267.255	Unkwnown	-0.00049811	0.664059	0.827733	0.043048
99.104	181.159	82.055	280.263	Unkwnown	0.00426845	0.0864501	0.812941	0.049552
99.117	181.159	82.042	280.276	Unkwnown	0.003659	0.0965299	0.801936	0.0495585
113.096	181.159	68.063	294.255	Unkwnown	3.69e-05	0.304278	0.877339	0.056548
113.107	181.159	68.052	294.266	Unkwnown	0.000925488	0.21073	0.872181	0.0565535
125.096	181.159	56.063	306.255	Unkwnown	0.00126954	0.163104	0.826582	0.062548
125.107	181.159	56.052	306.266	Unkwnown	0.00252224	0.104904	0.800431	0.0625535
127.112	181.159	54.047	308.271	Unkwnown	-0.00142989	0.338429	0.896251	0.063556
127.136	181.159	54.023	308.295	Unkwnown	-0.00103491	0.231736	0.902877	0.063568
128.12	181.159	53.039	309.279	Unkwnown	0.00215377	1.8546	0.894164	0.06406
128.143	181.159	53.016	309.302	Unkwnown	0.0024063	1.77221	0.894563	0.0640715
139.148	181.159	42.011	320.307	Unkwnown	0.00266181	0.188158	0.836639	0.069574
155.142	181.159	26.017	336.301	C2H2	0.000145795	0.510249	0.940966	0.077571
157.159	181.159	24	338.318	Unkwnown	0.00628892	1.08338	0.803983	0.0785795
163.123	181.159	18.036	344.282	H2O	0.0037881	0.431642	0.848669	0.0815615
163.136	181.159	18.023	344.295	H2O	0.00353991	0.434393	0.860243	0.081568
163.148	181.159	18.011	344.307	H2O	0.00332156	0.451192	0.866794	0.081574
175.148	181.159	6.011	356.307	Unkwnown	0.00849109	1.16163	0.839003	0.087574
178.123	181.159	3.036	359.282	Isotope-3	0.00706222	1.83363	0.835568	0.0890615
179.107	181.159	2.052	360.266	Isotope-2	0.00318394	1.05317	0.832795	0.0895535
57.07	181.17	124.1	238.24	Unkwnown	-0.0020119	0.0161821	0.843804	0.028535
69.07	181.17	112.1	250.24	Unkwnown	0.00103749	0.0193937	0.80099	0.034535
71.086	181.17	110.084	252.256	Unkwnown	-0.00274846	0.0343033	0.881672	0.035543
83	181.17	98.17	264.17	Unkwnown	0.00089422	0.0230653	0.820709	0.0415
83.086	181.17	98.084	264.256	Unkwnown	0.00215634	0.0278444	0.833904	0.041543
84.081	181.17	97.089	265.251	Unkwnown	0.000332815	0.3663	0.855417	0.0420405
85.101	181.17	96.069	266.271	Unkwnown	-0.00178414	0.0522962	0.884186	0.0425505
86.096	181.17	95.074	267.266	Unkwnown	-0.00278497	0.748915	0.896685	0.043048
97.101	181.17	84.069	278.271	Unkwnown	0.00129596	0.0360306	0.836904	0.0485505
99.09	181.17	82.08	280.26	Unkwnown	0	0.09	0.84	0.05
99.104	181.17	82.066	280.274	Unkwnown	0.0024935	0.0983731	0.888444	0.049552
99.117	181.17	82.053	280.287	Unkwnown	0.00147486	0.112921	0.901358	0.0495585
111.092	181.17	70.078	292.262	Unkwnown	0.00210028	0.0508824	0.829931	0.055546
111.104	181.17	70.066	292.274	Unkwnown	0.00173251	0.0493723	0.844083	0.055552
111.117	181.17	70.053	292.287	Unkwnown	0.00204141	0.0482957	0.829897	0.0555585
112.088	181.17	69.082	293.258	Unkwnown	0.00175172	0.550721	0.846123	0.056044
112.112	181.17	69.058	293.282	Unkwnown	0.00158157	0.46552	0.869284	0.056056
113.096	181.17	68.074	294.266	Unkwnown	-0.0012066	0.321693	0.890929	0.056548
113.107	181.17	68.063	294.277	Unkwnown	-0.00102436	0.235131	0.93475	0.0565535
125.096	181.17	56.074	306.266	Unkwnown	-0.000627166	0.181817	0.885296	0.062548
125.107	181.17	56.063	306.277	Unkwnown	0.000342384	0.12089	0.886427	0.0625535
125.12	181.17	56.05	306.29	Unkwnown	0.000940853	0.101604	0.87731	0.06256
127.112	181.17	54.058	308.282	Unkwnown	-0.00243074	0.350569	0.89165	0.063556
127.136	181.17	54.034	308.306	Unkwnown	-0.00281247	0.252356	0.94423	0.063568
128.12	181.17	53.05	309.29	Unkwnown	0.00136194	1.90837	0.883755	0.06406
128.143	181.17	53.027	309.313	Unkwnown	0.0010173	1.91715	0.92949	0.0640715
139.148	181.17	42.022	320.318	Unkwnown	0.000782513	0.212138	0.906171	0.069574
155.142	181.17	26.028	336.312	C2H2	-0.000939474	0.533798	0.945439	0.077571
163.123	181.17	18.047	344.293	H2O	0.00268423	0.459567	0.867911	0.0815615
163.136	181.17	18.034	344.306	H2O	0.0022904	0.467951	0.890137	0.081568
163.148	181.17	18.022	344.318	H2O	0.0019305	0.491387	0.906768	0.081574
166.135	181.17	15.035	347.305	Unkwnown	0.00516837	1.41877	0.881005	0.0830675
175.148	181.17	6.022	356.318	Unkwnown	0.00774932	1.22426	0.849224	0.087574
178.123	181.17	3.047	359.293	Isotope-3	0.00594783	2.01225	0.880776	0.0890615
179.107	181.17	2.063	360.277	Isotope-2	0.00225547	1.10014	0.835579	0.0895535
179.128	181.17	2.042	360.298	Isotope-2	0.00394628	0.366514	0.832853	0.089564
180.151	181.17	1.019	361.321	Isotope-1	0.00597494	1.0304	0.828531	0.0900755
181.159	181.17	0.011	362.329	Resolution	-0.000644131	1.01383	0.973774	0.0905795
114.128	182.109	67.981	296.237	Unkwnown	-0.00185249	0.152978	0.824439	0.057064
122.06	182.109	60.049	304.169	Unkwnown	-0.00185822	0.208101	0.816649	0.06103
155.086	182.109	27.023	337.195	Unkwnown	-0.00203349	0.231789	0.822611	0.077543
155.107	182.109	27.002	337.216	Unkwnown	-0.00200763	0.227366	0.832288	0.0775535
162.128	182.109	19.981	344.237	Unkwnown	0.0009885	0.871599	0.855108	0.081064
179.086	182.109	3.023	361.195	Isotope-3	-0.00158717	0.722557	0.825139	0.089543
181.076	182.109	1.033	363.185	Isotope-1	-0.00206771	0.171293	0.833349	0.090538
181.101	182.109	1.008	363.21	Isotope-1	-0.00194689	0.20624	0.852188	0.0905505
113.096	183.047	69.951	296.143	Unkwnown	-0.00214979	0.149075	0.822709	0.056548
127.112	183.047	55.935	310.159	Unkwnown	-0.00309996	0.170934	0.866479	0.063556
127.136	183.047	55.911	310.183	Unkwnown	-0.00255194	0.111622	0.832237	0.063568
128.12	183.047	54.927	311.167	Unkwnown	-0.00119208	0.921212	0.850624	0.06406
128.143	183.047	54.904	311.19	Unkwnown	-0.000821999	0.842427	0.814425	0.0640715
131.06	183.047	51.987	314.107	Unkwnown	0.000637289	0.576127	0.866468	0.06553
133.065	183.047	49.982	316.112	Unkwnown	0.000779004	0.268306	0.852828	0.0665325
133.101	183.047	49.946	316.148	Unkwnown	0.00162292	0.185338	0.848913	0.0665505
145.076	183.047	37.971	328.123	Unkwnown	0.00119775	0.460021	0.830008	0.072538
155.142	183.047	27.905	338.189	C2H4	-0.00208199	0.24945	0.880771	0.077571
157.159	183.047	25.888	340.206	C2H2	0.000559176	0.581469	0.826279	0.0785795
161.132	183.047	21.915	344.179	Unkwnown	0.000779291	0.496047	0.87464	0.080566
175.148	183.047	7.899	358.195	Unkwnown	0.00175106	0.621319	0.859375	0.087574
181.159	183.047	1.888	364.206	Isotope-2	-0.00136861	0.432255	0.82787	0.0905795
182.109	183.047	0.938	365.156	Isotope-1	0.00221813	0.929562	0.801818	0.0910545
127.112	183.08	55.968	310.192	Unkwnown	-0.00827816	0.402071	0.801365	0.063556
127.136	183.08	55.944	310.216	Unkwnown	-0.00795575	0.277599	0.813324	0.063568
131.06	183.08	52.02	314.14	Unkwnown	6.53e-05	1.41985	0.84003	0.06553
133.065	183.08	50.015	316.145	Unkwnown	0.000119986	0.681807	0.85213	0.0665325
133.101	183.08	49.979	316.181	Unkwnown	0.00185683	0.49617	0.893281	0.0665505
145.076	183.08	38.004	328.156	Unkwnown	0.00133905	1.14816	0.814741	0.072538
148.088	183.08	34.992	331.168	Unkwnown	0.00748513	3.65925	0.804716	0.074044
155.142	183.08	27.938	338.222	C2H4	-0.00630605	0.602475	0.836742	0.077571
161.132	183.08	21.948	344.212	Unkwnown	0.00042824	1.22082	0.846632	0.080566
175.148	183.08	7.932	358.228	Unkwnown	0.00232499	1.63625	0.889917	0.087574
181.159	183.08	1.921	364.239	Isotope-2	-0.00489479	1.06648	0.803629	0.0905795
183.047	183.08	0.033	366.127	Resolution	-0.000948903	2.34409	0.922173	0.0915235
148.125	186.14	38.015	334.265	Unkwnown	3.33e-06	1.02961	0.936827	0.0740625
133.101	187.148	54.047	320.249	Unkwnown	-0.00479328	0.769969	0.805893	0.0665505
175.148	187.148	12	362.296	C	-0.00474632	2.68628	0.849238	0.087574
183.08	187.148	4.068	370.228	Isotope-4	-0.00760843	1.54511	0.897925	0.09154
99.104	189.164	90.06	288.268	Unkwnown	-0.00536878	0.113055	0.831799	0.049552
99.117	189.164	90.047	288.281	Unkwnown	-0.00650917	0.129488	0.842906	0.0495585
113.107	189.164	76.057	302.271	Unkwnown	-0.00832687	0.252547	0.820415	0.0565535
127.136	189.164	62.028	316.3	Unkwnown	-0.01065	0.277312	0.84749	0.063568
128.143	189.164	61.021	317.307	Unkwnown	-0.00611885	2.05681	0.81588	0.0640715
155.142	189.164	34.022	344.306	Unkwnown	-0.00806838	0.56711	0.821356	0.077571
163.123	189.164	26.041	352.287	C2H2	-0.00492835	0.518674	0.800749	0.0815615
163.136	189.164	26.028	352.3	C2H2	-0.00550961	0.533896	0.830125	0.081568
163.148	189.164	26.016	352.312	C2H2	-0.00599097	0.563663	0.85022	0.081574
175.148	189.164	14.016	364.312	CH2	-0.00045767	1.6514	0.936281	0.087574
181.17	189.164	7.994	370.334	Unkwnown	-0.00666915	1.03248	0.844509	0.090585
183.08	189.164	6.084	372.244	Unkwnown	-0.00119859	0.846813	0.882604	0.09154
187.148	189.164	2.016	376.312	Isotope-2	0.00314356	0.525577	0.942306	0.093574
57.07	191.143	134.073	248.213	Unkwnown	-0.00939581	0.0430633	0.886252	0.028535
69.07	191.143	122.073	260.213	Unkwnown	-0.00145237	0.0518788	0.846229	0.034535
71.086	191.143	120.057	262.229	Unkwnown	-0.00919134	0.0866903	0.880176	0.035543
83.086	191.143	108.057	274.229	Unkwnown	0.00225569	0.0727147	0.861092	0.041543
84.081	191.143	107.062	275.224	Unkwnown	-0.00070048	0.905976	0.830401	0.0420405
85.101	191.143	106.042	276.244	Unkwnown	-0.00756845	0.134964	0.899841	0.0425505
86.096	191.143	105.047	277.239	Unkwnown	-0.00810595	1.83816	0.863567	0.043048
96.057	191.143	95.086	287.2	Unkwnown	0.0020881	0.964246	0.854738	0.0480285
97.101	191.143	94.042	288.244	Unkwnown	-0.00342093	0.104298	0.956025	0.0485505
99.104	191.143	92.039	290.247	Unkwnown	0.00608403	0.230321	0.817864	0.049552
99.117	191.143	92.026	290.26	Unkwnown	0.00217418	0.278815	0.875466	0.0495585
109.065	191.143	82.078	300.208	Unkwnown	0.00250967	0.230001	0.866546	0.0545325
109.076	191.143	82.067	300.219	Unkwnown	0.0010637	0.136059	0.914061	0.054538
109.089	191.143	82.054	300.232	Unkwnown	0.000826004	0.110977	0.927422	0.0545445
109.101	191.143	82.042	300.244	Unkwnown	0.000868873	0.105517	0.932872	0.0545505
110.073	191.143	81.07	301.216	Unkwnown	0.00441147	1.30683	0.836851	0.0550365
110.084	191.143	81.059	301.227	Unkwnown	0.0042179	0.912024	0.856226	0.055042
110.109	191.143	81.034	301.252	Unkwnown	0.00418766	0.798755	0.876693	0.0550545
111.092	191.143	80.051	302.235	Unkwnown	0.000959536	0.138053	0.887156	0.055546
111.104	191.143	80.039	302.247	Unkwnown	-0.00132508	0.139399	0.939405	0.055552
111.117	191.143	80.026	302.26	Unkwnown	-0.00125368	0.139762	0.94701	0.0555585
112.088	191.143	79.055	303.231	Unkwnown	0.000797092	1.45718	0.878484	0.056044
112.112	191.143	79.031	303.255	Unkwnown	-0.00168929	1.31192	0.961463	0.056056
113.107	191.143	78.036	304.25	Unkwnown	-0.00241999	0.554874	0.866253	0.0565535
123.092	191.143	68.051	314.235	Unkwnown	-0.00462697	0.198328	0.946689	0.061546
125.096	191.143	66.047	316.239	Unkwnown	-0.00492479	0.473663	0.905829	0.062548
125.107	191.143	66.036	316.25	Unkwnown	-0.00343242	0.324502	0.935422	0.0625535
125.12	191.143	66.023	316.263	Unkwnown	-0.00222726	0.276004	0.937491	0.06256
127.136	191.143	64.007	318.279	Unkwnown	-0.00513688	0.572138	0.840249	0.063568
128.143	191.143	63	319.286	Unkwnown	0.0031365	4.40991	0.838462	0.0640715
139.148	191.143	51.995	330.291	Unkwnown	-0.000494289	0.539913	0.905835	0.069574
149.096	191.143	42.047	340.239	Unkwnown	0.00120406	0.616196	0.907634	0.074548
155.142	191.143	36.001	346.285	Unkwnown	0.000453855	1.16019	0.80588	0.077571
163.123	191.143	28.02	354.266	C2H4	0.00552437	1.11912	0.82886	0.0815615
163.136	191.143	28.007	354.279	C2H4	0.00428074	1.15152	0.85918	0.081568
163.148	191.143	27.995	354.291	C2H4	0.00306759	1.22321	0.885474	0.081574
166.135	191.143	25.008	357.278	Unkwnown	0.00849043	3.98602	0.970898	0.0830675
167.07	191.143	24.073	358.213	Unkwnown	0.00892257	0.147829	0.887633	0.083535
167.086	191.143	24.057	358.229	Unkwnown	0.00780318	0.189603	0.89329	0.083543
178.123	191.143	13.02	369.266	Unkwnown	0.0113375	5.47606	0.939793	0.0890615
179.107	191.143	12.036	370.25	C	0.0021718	2.90679	0.865405	0.0895535
179.128	191.143	12.015	370.271	C	0.00332482	1.09684	0.977865	0.089564
180.151	191.143	10.992	371.294	Unkwnown	0.00945972	3.07473	0.969858	0.0900755
181.17	191.143	9.973	372.313	Unkwnown	0.00204267	2.20727	0.865568	0.090585
113.096	193.101	80.005	306.197	Unkwnown	-0.00111162	0.110301	0.81419	0.056548
127.112	193.101	65.989	320.213	Unkwnown	-0.00167705	0.123428	0.836942	0.063556
128.12	193.101	64.981	321.221	Unkwnown	-0.00056537	0.707336	0.872905	0.06406
128.143	193.101	64.958	321.244	Unkwnown	-0.000150572	0.626624	0.809769	0.0640715
155.142	193.101	37.959	348.243	Unkwnown	-0.00105432	0.184303	0.870242	0.077571
163.123	193.101	29.978	356.224	Unkwnown	0.000173508	0.159673	0.803649	0.0815615
163.136	193.101	29.965	356.237	Unkwnown	0.000141863	0.158158	0.801814	0.081568
165.091	193.101	28.01	358.192	C2H4	0.000205102	0.461662	0.835492	0.0825455
179.086	193.101	14.015	372.187	CH2	0.00013909	0.651	0.856825	0.089543
179.107	193.101	13.994	372.208	CH2	-0.000346133	0.41881	0.847463	0.0895535
181.159	193.101	11.942	374.26	C	-0.000818242	0.340366	0.871361	0.0905795
181.17	193.101	11.931	374.271	C	-0.000232683	0.308172	0.821501	0.090585
183.047	193.101	10.054	376.148	Unkwnown	0.00107728	0.610445	0.816023	0.0915235
57.07	193.122	136.052	250.192	Unkwnown	-0.00382459	0.0144773	0.861432	0.028535
69.07	193.122	124.052	262.192	Unkwnown	-0.00122516	0.0175523	0.826874	0.034535
71.086	193.122	122.036	264.208	Unkwnown	-0.00333782	0.0282562	0.831454	0.035543
83.086	193.122	110.036	276.208	Unkwnown	0.000483803	0.0234769	0.804687	0.041543
85.101	193.122	108.021	278.223	Unkwnown	-0.00261516	0.0433241	0.83735	0.0425505
86.096	193.122	107.026	279.218	Unkwnown	-0.0028273	0.591888	0.806229	0.043048
95.086	193.122	98.036	288.208	Unkwnown	0.00107117	0.0247226	0.831175	0.047543
96.057	193.122	97.065	289.179	Unkwnown	-0.00057144	0.343996	0.883842	0.0480285
97.101	193.122	96.021	290.223	Unkwnown	-0.00123776	0.0333431	0.884318	0.0485505
109.065	193.122	84.057	302.187	Unkwnown	-0.000484639	0.0825552	0.900448	0.0545325
109.076	193.122	84.046	302.198	Unkwnown	-0.000597211	0.047027	0.913954	0.054538
109.089	193.122	84.033	302.211	Unkwnown	-0.000580288	0.0380008	0.918358	0.0545445
109.101	193.122	84.021	302.223	Unkwnown	-0.000581585	0.0361861	0.925023	0.0545505
110.073	193.122	83.049	303.195	Unkwnown	0.000245279	0.466797	0.866401	0.0550365
110.084	193.122	83.038	303.206	Unkwnown	0.000390869	0.318628	0.866885	0.055042
110.109	193.122	83.013	303.231	Unkwnown	0.000401171	0.278449	0.88563	0.0550545
111.092	193.122	82.03	304.214	Unkwnown	6.39e-05	0.0445786	0.829803	0.055546
111.104	193.122	82.018	304.226	Unkwnown	-0.000579402	0.0446138	0.870546	0.055552
111.117	193.122	82.005	304.239	Unkwnown	-0.000478327	0.0443976	0.8709	0.0555585
112.088	193.122	81.034	305.21	Unkwnown	-0.000182373	0.479699	0.838339	0.056044
112.112	193.122	81.01	305.234	Unkwnown	-0.000741543	0.421667	0.895688	0.056056
123.092	193.122	70.03	316.214	Unkwnown	-0.00271278	0.069363	0.958668	0.061546
125.096	193.122	68.026	318.218	Unkwnown	-0.00192169	0.154058	0.853734	0.062548
125.107	193.122	68.015	318.229	Unkwnown	-0.00112985	0.102708	0.857916	0.0625535
125.12	193.122	68.002	318.242	Unkwnown	-0.000621437	0.0863225	0.849594	0.06256
139.148	193.122	53.974	332.27	Unkwnown	-0.000110885	0.169391	0.823779	0.069574
149.096	193.122	44.026	342.218	Unkwnown	-0.000917005	0.22044	0.941002	0.074548
163.123	193.122	29.999	356.245	Unkwnown	0.00109842	0.380215	0.816636	0.0815615
163.136	193.122	29.986	356.258	Unkwnown	0.000775909	0.387012	0.837357	0.081568
163.148	193.122	29.974	356.27	Unkwnown	0.000415289	0.409091	0.858719	0.081574
166.135	193.122	26.987	359.257	Unkwnown	0.00238475	1.30624	0.922337	0.0830675
167.07	193.122	26.052	360.192	C2H2	0.00221038	0.0505013	0.878059	0.083535
167.086	193.122	26.036	360.208	C2H2	0.00195486	0.0637623	0.870049	0.083543
178.123	193.122	14.999	371.245	Unkwnown	0.00306414	1.86296	0.927013	0.0890615
179.107	193.122	14.015	372.229	CH2	-0.000739627	1.05654	0.912195	0.0895535
179.128	193.122	13.994	372.25	CH2	0.000408335	0.370429	0.957176	0.089564
180.151	193.122	12.971	373.273	Unkwnown	0.00267021	1.01206	0.925341	0.0900755
181.17	193.122	11.952	374.292	C	0.000253867	0.72467	0.824115	0.090585
191.143	193.122	1.979	384.265	Isotope-2	-0.00037859	0.327103	0.948039	0.0955715
57.07	194.154	137.084	251.224	Unkwnown	-0.0041258	0.010947	0.84225	0.028535
71.086	194.154	123.068	265.24	Unkwnown	-0.00411018	0.0221144	0.840427	0.035543
85.101	194.154	109.053	279.255	Unkwnown	-0.00376848	0.0346779	0.865425	0.0425505
86.096	194.154	108.058	280.25	Unkwnown	-0.00375102	0.465103	0.81745	0.043048
96.057	194.154	98.097	290.211	Unkwnown	-0.00169512	0.261065	0.865447	0.0480285
97.101	194.154	97.053	291.255	Unkwnown	-0.00273417	0.0268918	0.921537	0.0485505
99.117	194.154	95.037	293.271	Unkwnown	-0.00122408	0.0712498	0.837187	0.0495585
109.065	194.154	85.089	303.219	Unkwnown	-0.00137939	0.0606794	0.854581	0.0545325
109.076	194.154	85.078	303.23	Unkwnown	-0.00172791	0.0357486	0.897478	0.054538
109.089	194.154	85.065	303.243	Unkwnown	-0.00179692	0.0291821	0.911203	0.0545445
109.101	194.154	85.053	303.255	Unkwnown	-0.00183369	0.0279112	0.921902	0.0545505
110.073	194.154	84.081	304.227	Unkwnown	-0.000870584	0.344433	0.824936	0.0550365
110.084	194.154	84.07	304.238	Unkwnown	-0.000911406	0.240036	0.842788	0.055042
110.109	194.154	84.045	304.263	Unkwnown	-0.00101092	0.21289	0.873839	0.0550545
111.092	194.154	83.062	305.246	Unkwnown	-0.00148849	0.0350717	0.842822	0.055546
111.104	194.154	83.05	305.258	Unkwnown	-0.00215886	0.0357943	0.901972	0.055552
111.117	194.154	83.037	305.271	Unkwnown	-0.00218833	0.0360907	0.914395	0.0555585
112.088	194.154	82.066	306.242	Unkwnown	-0.00152801	0.370109	0.834558	0.056044
112.112	194.154	82.042	306.266	Unkwnown	-0.00233146	0.339983	0.931884	0.056056
113.107	194.154	81.047	307.261	Unkwnown	-0.00217573	0.138172	0.807128	0.0565535
123.092	194.154	71.062	317.246	Unkwnown	-0.00331772	0.0526272	0.939003	0.061546
125.096	194.154	69.058	319.25	Unkwnown	-0.00286624	0.118814	0.849869	0.062548
125.107	194.154	69.047	319.261	Unkwnown	-0.00257523	0.0821699	0.885979	0.0625535
125.12	194.154	69.034	319.274	Unkwnown	-0.00230552	0.0701783	0.891639	0.06256
139.148	194.154	55.006	333.302	Unkwnown	-0.00176119	0.135539	0.850609	0.069574
149.096	194.154	45.058	343.25	Unkwnown	-0.00201499	0.168463	0.928002	0.074548
163.136	194.154	31.018	357.29	Unkwnown	-0.000562042	0.289056	0.807194	0.081568
163.148	194.154	31.006	357.302	Unkwnown	-0.000920485	0.309363	0.838066	0.081574
166.135	194.154	28.019	360.289	C2H4	0.000191231	1.05285	0.959205	0.0830675
167.07	194.154	27.084	361.224	Unkwnown	0.000199546	0.0397359	0.89186	0.083535
167.086	194.154	27.068	361.24	Unkwnown	-3.65e-05	0.0504486	0.888552	0.083543
178.123	194.154	16.031	372.277	Unkwnown	0.000914563	1.45416	0.933626	0.0890615
179.107	194.154	15.047	373.261	Unkwnown	-0.00134046	0.754241	0.840233	0.0895535
179.128	194.154	15.026	373.282	Unkwnown	-0.00122755	0.29182	0.97307	0.089564
180.151	194.154	14.003	374.305	CH2	0.000383233	0.821023	0.968593	0.0900755
181.17	194.154	12.984	375.324	Unkwnown	-0.00120079	0.559814	0.821377	0.090585
191.143	194.154	3.011	385.297	Isotope-3	-0.00190575	0.259531	0.970688	0.0955715
193.122	194.154	1.032	387.276	Isotope-1	-0.0010726	0.739974	0.954736	0.096561
86.06	195.065	109.005	281.125	Unkwnown	-0.000773815	0.239545	0.813824	0.04303
155.086	195.065	39.979	350.151	Unkwnown	-0.000595236	0.189571	0.818811	0.077543
182.109	195.065	12.956	377.174	Unkwnown	0.00148105	0.658047	0.80068	0.0910545
86.06	195.138	109.078	281.198	Unkwnown	0.00106366	0.335466	0.802732	0.04303
127.112	195.138	68.026	322.25	Unkwnown	-0.000866004	0.165368	0.833188	0.063556
128.12	195.138	67.018	323.258	Unkwnown	0.000627613	0.947023	0.868763	0.06406
155.142	195.138	39.996	350.28	Unkwnown	0.000229205	0.237221	0.832463	0.077571
162.128	195.138	33.01	357.266	Unkwnown	0.00481684	0.975456	0.820062	0.081064
179.086	195.138	16.052	374.224	Unkwnown	0.00152401	0.879698	0.860811	0.089543
181.159	195.138	13.979	376.297	CH2	0.000498242	0.440606	0.838466	0.0905795
182.109	195.138	13.029	377.247	Unkwnown	0.00411458	0.962876	0.825112	0.0910545
183.047	195.138	12.091	378.185	C	0.0025224	0.883188	0.877596	0.0915235
193.101	195.138	2.037	388.239	Isotope-2	0.00194334	1.19552	0.888798	0.0965505
195.065	195.138	0.073	390.203	Resolution	0.00257237	1.26686	0.892194	0.0975325
133.065	197.132	64.067	330.197	Unkwnown	-0.00354819	0.739214	0.830304	0.0665325
133.101	197.132	64.031	330.233	Unkwnown	-0.00147014	0.525896	0.850858	0.0665505
175.148	197.132	21.984	372.28	Unkwnown	-0.000731665	1.68184	0.821904	0.087574
183.047	197.132	14.085	380.179	CH2	-0.00357069	2.29556	0.811519	0.0915235
183.08	197.132	14.052	380.212	CH2	-0.00311565	1.02728	0.92284	0.09154
187.148	197.132	9.984	384.28	Unkwnown	0.00222923	0.627484	0.970078	0.093574
189.164	197.132	7.968	386.296	Unkwnown	-0.000314743	1.02529	0.883557	0.094582
127.112	199.148	72.036	326.26	Unkwnown	-0.00319576	0.230703	0.820444	0.063556
131.06	199.148	68.088	330.208	Unkwnown	0.00147512	0.831542	0.877143	0.06553
133.065	199.148	66.083	332.213	Unkwnown	0.00202779	0.362945	0.809272	0.0665325
145.076	199.148	54.072	344.224	Unkwnown	0.00220504	0.674579	0.853373	0.072538
157.159	199.148	41.989	356.307	Unkwnown	0.00104221	0.885083	0.882009	0.0785795
161.132	199.148	38.016	360.28	Unkwnown	0.00173655	0.708668	0.876324	0.080566
182.109	199.148	17.039	381.257	Unkwnown	0.00372477	1.35405	0.819108	0.0910545
183.047	199.148	16.101	382.195	Unkwnown	0.00117264	1.30975	0.918663	0.0915235
183.08	199.148	16.068	382.228	Unkwnown	0.00245781	0.482359	0.860847	0.09154
195.065	199.148	4.083	394.213	Isotope-4	0.00189875	1.67384	0.832201	0.0975325
195.138	199.148	4.01	394.286	Isotope-4	-0.00102173	1.24883	0.881638	0.097569
99.104	201.139	102.035	300.243	Unkwnown	-0.00814438	0.158909	0.816178	0.049552
99.117	201.139	102.022	300.256	Unkwnown	-0.00983851	0.182869	0.830791	0.0495585
113.107	201.139	88.032	314.246	Unkwnown	-0.0126269	0.360268	0.816841	0.0565535
127.136	201.139	74.003	328.275	Unkwnown	-0.0156809	0.39155	0.835199	0.063568
133.101	201.139	68.038	334.24	Unkwnown	-0.000803544	0.635753	0.833195	0.0665505
175.148	201.139	25.991	376.287	C2H2	-0.000748687	2.21454	0.876679	0.087574
183.08	201.139	18.059	384.219	H2O	-0.00296731	1.25952	0.916534	0.09154
187.148	201.139	13.991	388.287	CH2	0.00343041	0.789643	0.988737	0.093574
189.164	201.139	11.975	390.303	C	-0.000254654	1.3577	0.947833	0.094582
197.132	201.139	4.007	398.271	Isotope-4	0.000997713	1.20548	0.976438	0.098566
175.148	201.233	26.085	376.381	C2H2	-0.00213057	0.656725	0.814012	0.087574
183.08	201.233	18.153	384.313	Unkwnown	-0.00288834	0.383614	0.874227	0.09154
187.148	201.233	14.085	388.381	CH2	-0.000972544	0.244778	0.960073	0.093574
189.164	201.233	12.069	390.397	C	-0.00200475	0.405513	0.886605	0.094582
197.132	201.233	4.101	398.365	Isotope-4	-0.0017221	0.373036	0.946298	0.098566
201.139	201.233	0.094	402.372	Resolution	-0.00199711	0.305893	0.957944	0.10057
85.101	203.086	117.985	288.187	Unkwnown	-0.00392129	0.0164041	0.801037	0.0425505
86.096	203.086	116.99	289.182	Unkwnown	-0.00426061	0.236092	0.819371	0.043048
99.104	203.086	103.982	302.19	Unkwnown	-0.00268792	0.031835	0.831448	0.049552
99.117	203.086	103.969	302.203	Unkwnown	-0.00296803	0.0360739	0.833067	0.0495585
113.107	203.086	89.979	316.193	Unkwnown	-0.00372797	0.0744886	0.857625	0.0565535
127.112	203.086	75.974	330.198	Unkwnown	-0.00421224	0.111917	0.824552	0.063556
127.136	203.086	75.95	330.222	Unkwnown	-0.00440473	0.0816617	0.884794	0.063568
128.12	203.086	74.966	331.206	Unkwnown	-0.00303468	0.614499	0.824956	0.06406
128.143	203.086	74.943	331.229	Unkwnown	-0.00313717	0.616012	0.865846	0.0640715
139.148	203.086	63.938	342.234	Unkwnown	-0.00300633	0.0646967	0.800253	0.069574
155.142	203.086	47.944	358.228	Unkwnown	-0.00383477	0.17408	0.89346	0.077571
163.123	203.086	39.963	366.209	Unkwnown	-0.00267341	0.150746	0.8251	0.0815615
163.136	203.086	39.95	366.222	Unkwnown	-0.00279915	0.153352	0.845385	0.081568
163.148	203.086	39.938	366.234	Unkwnown	-0.00291016	0.160735	0.859585	0.081574
175.148	203.086	27.938	378.234	C2H4	-0.00121787	0.44615	0.897173	0.087574
181.159	203.086	21.927	384.245	Unkwnown	-0.00349998	0.313418	0.872577	0.0905795
181.17	203.086	21.916	384.256	Unkwnown	-0.0032959	0.308773	0.895024	0.090585
183.047	203.086	20.039	386.133	Unkwnown	-0.00182665	0.577719	0.83997	0.0915235
183.08	203.086	20.006	386.166	Unkwnown	-0.00145233	0.232248	0.858791	0.09154
187.148	203.086	15.938	390.234	Unkwnown	-0.000148099	0.129354	0.823244	0.093574
189.164	203.086	13.922	392.25	CH2	-0.000962818	0.25184	0.893542	0.094582
197.132	203.086	5.954	400.218	Unkwnown	-0.000538641	0.196342	0.807965	0.098566
201.139	203.086	1.947	404.225	Isotope-2	-0.000758121	0.168884	0.858187	0.10057
201.233	203.086	1.853	404.319	Isotope-2	0.000397503	0.493408	0.800096	0.100616
85.101	203.154	118.053	288.255	Unkwnown	-0.0173437	0.100109	0.803843	0.0425505
99.104	203.154	104.05	302.258	Unkwnown	-0.00969151	0.193149	0.828838	0.049552
99.117	203.154	104.037	302.271	Unkwnown	-0.0120061	0.224689	0.853047	0.0495585
113.107	203.154	90.047	316.261	Unkwnown	-0.0149693	0.435113	0.824424	0.0565535
127.136	203.154	76.018	330.29	Unkwnown	-0.0188377	0.475694	0.847788	0.063568
128.143	203.154	75.011	331.297	Unkwnown	-0.0108845	3.50027	0.809965	0.0640715
133.101	203.154	70.053	336.255	Unkwnown	-0.00015652	0.734881	0.804268	0.0665505
155.142	203.154	48.012	358.296	Unkwnown	-0.0141668	0.963785	0.814276	0.077571
163.148	203.154	40.006	366.302	Unkwnown	-0.00979612	0.921948	0.811439	0.081574
175.148	203.154	28.006	378.302	C2H4	-0.000938263	2.74278	0.906934	0.087574
[truncated: 201 more rows]

## Sheet: Correlation at EN=150
Pearson correlation > 0.9
Mass1	Mass2	MassDifference	MassSum	CorrelationType	intercept	slope	corr	resolution
31.02	31.03	0.01	62.05	Resolution	-0.14	0.71	1	0.02
31.02	33.03	2.02	64.05	Isotope-2	-1.28	2.99	0.85	0.02
31.03	33.03	2	64.06	Isotope-2	-0.72	4.22	0.86	0.02
31.02	33.05	2.03	64.06	Unkwnown	-1.05	2.27	0.85	0.02
31.03	33.05	2.02	64.07	Isotope-2	-0.62	3.19	0.86	0.02
33.03	33.05	0.01	66.08	Resolution	-0.08	0.76	0.99	0.02
31.02	41.04	10.02	72.06	Unkwnown	-0.59	1.21	0.84	0.02
31.03	41.04	10.01	72.07	Unkwnown	-0.36	1.7	0.85	0.02
33.03	41.04	8.01	74.07	Unkwnown	0.12	0.32	0.82	0.02
33.05	41.04	7.99	74.08	Unkwnown	0.14	0.43	0.83	0.02
41	41.04	0.04	82.04	Unkwnown	-0.73	71.17	0.87	0.02
31.02	43.02	12	74.04	C	-1.66	2.53	0.89	0.02
31.03	43.02	11.99	74.05	C	-1.16	3.55	0.9	0.02
33.03	43.02	9.99	76.05	Unkwnown	-0.09	0.64	0.84	0.02
33.05	43.02	9.97	76.06	Unkwnown	0.01	0.83	0.82	0.02
31.02	44.06	13.04	75.08	Unkwnown	-0.01	0.02	0.84	0.02
31.03	44.06	13.03	75.09	Unkwnown	0	0.03	0.83	0.02
41	44.06	3.06	85.06	Unkwnown	-0.01	1.34	0.9	0.02
41.04	44.06	3.02	85.1	Isotope-3	0	0.02	0.92	0.02
31.02	45.03	14.02	76.05	CH2	-1.39	2.14	0.91	0.02
31.03	45.03	14	76.06	CH2	-0.97	2.99	0.92	0.02
33.03	45.03	12	78.07	C	-0.11	0.56	0.89	0.02
33.05	45.03	11.99	78.08	C	-0.03	0.72	0.88	0.02
41.04	45.03	3.99	86.07	Isotope-4	0.02	1.36	0.85	0.02
43.02	45.03	2.02	88.05	Isotope-2	0.11	0.77	0.92	0.02
46.02	47.01	0.99	93.03	Isotope-1	-0.04	1.73	0.86	0.02
31.02	47.04	16.02	78.06	Unkwnown	-0.12	0.22	0.86	0.02
31.03	47.04	16.01	78.07	Unkwnown	-0.07	0.31	0.86	0.02
41.04	47.04	6	88.08	Unkwnown	0.03	0.14	0.81	0.02
43.02	47.04	4.02	90.06	Isotope-4	0.04	0.08	0.84	0.02
44.06	47.04	2.98	91.1	Isotope-3	0	7.87	0.81	0.02
45.03	47.04	2	92.07	Isotope-2	0.03	0.1	0.9	0.02
47.01	47.04	0.02	94.05	Resolution	0.02	0.26	0.83	0.02
41.04	47.05	6.01	88.09	Unkwnown	0	0.11	0.81	0.02
44.06	47.05	2.99	91.11	Isotope-3	-0.02	6.3	0.81	0.02
45.03	47.05	2.02	92.08	Isotope-2	0.01	0.07	0.85	0.02
47.04	47.05	0.01	94.09	Resolution	-0.01	0.74	0.93	0.02
41.04	47.06	6.02	88.1	Unkwnown	0	0.1	0.8	0.02
44.06	47.06	3	91.12	Isotope-3	-0.01	5.33	0.81	0.02
45.03	47.06	2.03	92.09	Isotope-2	0.01	0.06	0.83	0.02
47.04	47.06	0.02	94.1	Resolution	-0.01	0.62	0.92	0.02
47.05	47.06	0.01	94.11	Resolution	0	0.85	1	0.02
46.02	47.98	1.96	94.01	Unkwnown	0	0.06	0.9	0.02
52.01	52.02	0.01	104.03	Resolution	0	0.34	0.86	0.03
41.04	53.03	11.99	94.07	C	0.01	0.07	0.89	0.02
44.06	53.03	8.96	97.09	Unkwnown	0	3.37	0.82	0.02
47.05	53.03	5.98	100.08	Unkwnown	0.02	0.42	0.8	0.02
41	54.05	13.04	95.05	Unkwnown	-0.01	0.99	0.85	0.02
41.04	54.05	13.01	95.09	Unkwnown	0	0.01	0.85	0.02
44.06	54.05	9.98	98.11	Unkwnown	0	0.67	0.85	0.02
53.03	54.05	1.02	107.07	Isotope-1	0	0.16	0.83	0.03
53.94	54.95	1.01	108.89	Isotope-1	0	0.35	0.9	0.03
31.02	57.03	26.02	88.05	C2H2	-0.12	0.17	0.92	0.02
31.03	57.03	26	88.06	C2H2	-0.09	0.24	0.92	0.02
33.03	57.03	24	90.07	Unkwnown	-0.02	0.04	0.88	0.02
33.05	57.03	23.99	90.08	Unkwnown	-0.01	0.06	0.87	0.02
41.04	57.03	15.99	98.07	Unkwnown	0	0.11	0.82	0.02
43.02	57.03	14.02	100.05	CH2	0	0.06	0.95	0.02
45.03	57.03	12	102.07	C	0	0.07	0.95	0.02
47.04	57.03	10	104.07	Unkwnown	0	0.62	0.88	0.02
41	57.07	16.07	98.07	Unkwnown	-0.36	33.55	0.85	0.02
41.04	57.07	16.03	98.11	Unkwnown	-0.01	0.46	0.97	0.02
44.06	57.07	13.01	101.13	Unkwnown	-0.06	23.86	0.89	0.02
53.03	57.07	4.04	110.1	Unkwnown	0.04	5.45	0.84	0.03
54.05	57.07	3.02	111.12	Isotope-3	0.16	28.7	0.85	0.03
31.02	59.05	28.03	90.07	Unkwnown	-3.28	4.53	0.87	0.02
31.03	59.05	28.02	90.08	C2H4	-2.43	6.4	0.88	0.02
33.03	59.05	26.02	92.08	C2H2	-0.62	1.21	0.85	0.02
33.05	59.05	26	92.09	C2H2	-0.42	1.56	0.84	0.02
43.02	59.05	16.03	102.07	Unkwnown	0.02	1.55	0.82	0.02
45.03	59.05	14.02	104.08	CH2	-0.19	2.01	0.91	0.02
57.03	59.05	2.02	116.08	Isotope-2	0.07	24.27	0.85	0.03
31.02	59.09	28.07	90.1	Unkwnown	-0.09	0.15	0.88	0.02
31.03	59.09	28.06	90.12	Unkwnown	-0.06	0.21	0.89	0.02
33.03	59.09	26.05	92.12	Unkwnown	0	0.04	0.86	0.02
33.05	59.09	26.04	92.13	Unkwnown	0	0.05	0.85	0.02
45.03	59.09	14.05	104.12	Unkwnown	0.02	0.06	0.87	0.02
57.03	59.09	2.05	116.12	Unkwnown	0.02	0.75	0.82	0.03
59.05	59.09	0.04	118.14	Resolution	0.02	0.03	0.93	0.03
43.02	61.03	18.01	104.05	H2O	-0.06	0.36	0.94	0.02
45.03	61.03	16	106.06	Unkwnown	-0.02	0.39	0.85	0.02
47.04	61.03	13.99	108.07	CH2	-0.05	3.37	0.81	0.02
57.03	61.03	4	118.06	Isotope-4	0.01	4.99	0.86	0.03
31.02	61.07	30.05	92.08	Unkwnown	-0.03	0.05	0.81	0.02
31.03	61.07	30.04	92.09	Unkwnown	-0.02	0.07	0.81	0.02
43.02	61.07	18.05	104.08	Unkwnown	0	0.02	0.92	0.02
45.03	61.07	16.03	106.1	Unkwnown	0.01	0.02	0.83	0.02
57.03	61.07	4.03	118.1	Isotope-4	0.01	0.26	0.85	0.03
61.03	61.07	0.04	122.09	Resolution	0.01	0.05	0.92	0.03
47.98	64	16.02	111.99	Unkwnown	-0.1	6.5	0.86	0.02
41.04	65.02	23.98	106.06	Unkwnown	0	0.02	0.82	0.02
44.06	65.02	20.96	109.08	Unkwnown	0	0.82	0.8	0.02
47.04	65.02	17.98	112.06	H2O	0	0.08	0.81	0.02
47.05	65.02	17.97	112.07	H2O	0.01	0.1	0.81	0.02
53.03	65.02	11.99	118.05	C	0	0.22	0.87	0.03
41	68.05	27.05	109.05	Unkwnown	-0.02	1.69	0.87	0.02
41.04	68.05	27.01	109.09	Unkwnown	0	0.02	0.94	0.02
44.06	68.05	23.99	112.11	Unkwnown	0	1.18	0.9	0.02
54.05	68.05	14	122.1	CH2	0.01	1.44	0.86	0.03
57.07	68.05	10.98	125.12	Unkwnown	0	0.05	0.95	0.03
31.02	69.03	38.02	100.05	Unkwnown	-0.02	0.05	0.81	0.02
31.03	69.03	38	100.06	Unkwnown	-0.01	0.07	0.82	0.02
41.04	69.03	27.99	110.07	C2H4	0.01	0.03	0.84	0.02
45.03	69.03	24	114.07	Unkwnown	0.01	0.02	0.87	0.02
53.03	69.03	16.01	122.06	Unkwnown	0.01	0.46	0.86	0.03
57.03	69.03	12	126.07	C	0.02	0.27	0.87	0.03
59.05	69.03	9.98	128.08	Unkwnown	0.02	0.01	0.81	0.03
65.02	69.03	4.01	134.05	Isotope-4	0.01	1.74	0.81	0.03
31.03	69.07	38.04	100.1	Unkwnown	-0.12	0.49	0.8	0.02
41	69.07	28.07	110.07	Unkwnown	-0.24	20.85	0.84	0.02
41.04	69.07	28.03	110.11	Unkwnown	-0.02	0.29	0.97	0.02
44.06	69.07	25.01	113.13	Unkwnown	-0.05	14.78	0.88	0.02
53.03	69.07	16.04	122.1	Unkwnown	0.01	3.35	0.82	0.03
54.05	69.07	15.02	123.12	Unkwnown	0.09	17.79	0.83	0.03
57.07	69.07	12	126.14	C	-0.01	0.61	0.98	0.03
68.05	69.07	1.02	137.12	Isotope-1	-0.01	12.38	0.97	0.03
31.03	71.05	40.02	102.08	Unkwnown	-0.15	0.35	0.81	0.02
33.03	71.05	38.02	104.08	Unkwnown	-0.07	0.08	0.85	0.02
33.05	71.05	38	104.09	Unkwnown	-0.06	0.1	0.84	0.02
43.02	71.05	28.03	114.07	C2H4	-0.03	0.1	0.86	0.02
45.03	71.05	26.02	116.08	C2H2	-0.02	0.11	0.83	0.02
57.03	71.05	14.02	128.08	CH2	-0.03	1.5	0.88	0.03
61.07	71.05	9.98	132.11	Unkwnown	-0.03	4.4	0.81	0.03
41	71.09	30.08	112.09	Unkwnown	-0.15	14.7	0.83	0.02
41.04	71.09	30.05	112.13	Unkwnown	0.02	0.19	0.9	0.02
44.06	71.09	27.02	115.15	Unkwnown	-0.01	10.17	0.85	0.02
57.07	71.09	14.02	128.16	CH2	0.02	0.43	0.96	0.03
68.05	71.09	3.04	139.14	Isotope-3	0.03	8.34	0.92	0.03
69.07	71.09	2.02	140.16	Isotope-2	0.03	0.67	0.94	0.03
31.02	73.07	42.05	104.08	Unkwnown	-0.33	0.43	0.85	0.02
31.03	73.07	42.04	104.09	Unkwnown	-0.25	0.6	0.86	0.02
33.03	73.07	40.03	106.1	Unkwnown	-0.07	0.11	0.81	0.02
33.05	73.07	40.02	106.11	Unkwnown	-0.06	0.15	0.81	0.02
41.04	73.07	32.03	114.1	Unkwnown	-0.07	0.3	0.87	0.02
44.06	73.07	29	117.13	Unkwnown	-0.1	15.5	0.8	0.02
45.03	73.07	28.03	118.1	C2H4	-0.04	0.19	0.9	0.02
47.04	73.07	26.03	120.1	C2H2	-0.05	1.62	0.84	0.02
57.03	73.07	16.03	130.1	Unkwnown	-0.01	2.34	0.86	0.03
57.07	73.07	16	130.14	Unkwnown	-0.04	0.6	0.83	0.03
59.05	73.07	14.02	132.11	CH2	0.01	0.08	0.85	0.03
59.09	73.07	13.98	132.15	CH2	-0.03	2.45	0.82	0.03
68.05	73.07	5.02	141.11	Unkwnown	-0.04	12.16	0.83	0.03
69.03	73.07	4.03	142.1	Isotope-4	-0.09	7.29	0.83	0.03
69.07	73.07	4	142.14	Isotope-4	-0.04	0.99	0.87	0.03
52.01	75.04	23.03	127.06	Unkwnown	1.23	303.96	0.86	0.03
52.01	75.07	23.06	127.08	Unkwnown	0.11	28.58	0.85	0.03
75.04	75.07	0.02	150.11	Resolution	0	0.09	0.94	0.04
31.02	77.06	46.04	108.08	Unkwnown	-0.02	0.04	0.84	0.02
31.03	77.06	46.03	108.09	Unkwnown	-0.02	0.06	0.84	0.02
33.03	77.06	44.03	110.09	Unkwnown	0	0.01	0.82	0.02
33.05	77.06	44.02	110.11	Unkwnown	0	0.02	0.83	0.02
41	77.06	36.06	118.06	Unkwnown	-0.03	2.46	0.87	0.02
41.04	77.06	36.02	118.1	Unkwnown	0	0.03	0.9	0.02
44.06	77.06	33	121.12	Unkwnown	-0.01	1.74	0.91	0.02
45.03	77.06	32.03	122.09	Unkwnown	0.01	0.02	0.8	0.02
47.04	77.06	30.02	124.1	Unkwnown	0	0.15	0.81	0.02
54.05	77.06	23.01	131.11	Unkwnown	0.01	2.01	0.83	0.03
57.07	77.06	19.99	134.13	Unkwnown	0	0.06	0.88	0.03
68.05	77.06	9.01	145.11	Unkwnown	0	1.33	0.91	0.03
69.07	77.06	7.99	146.13	Unkwnown	0	0.1	0.89	0.03
71.09	77.06	5.97	148.15	Unkwnown	0	0.13	0.82	0.04
73.07	77.06	4	150.13	Isotope-4	0.01	0.08	0.87	0.04
41.04	78.05	37.01	119.09	Unkwnown	0	0.01	0.83	0.02
54.05	78.05	24	132.09	Unkwnown	0	1.03	0.9	0.03
57.07	78.05	20.98	135.12	Unkwnown	0	0.03	0.84	0.03
65.02	78.05	13.03	143.07	Unkwnown	-0.01	0.72	0.8	0.03
68.05	78.05	10	146.1	Unkwnown	0	0.58	0.83	0.03
69.07	78.05	8.98	147.12	Unkwnown	0	0.05	0.83	0.03
73.07	78.05	4.98	151.11	Unkwnown	0	0.04	0.88	0.04
77.06	78.05	0.99	155.11	Isotope-1	0	0.4	0.85	0.04
41.04	79.05	38.02	120.09	Unkwnown	0	0.23	0.82	0.02
45.03	79.05	34.02	124.09	Unkwnown	0.04	0.14	0.82	0.02
47.05	79.05	32.01	126.1	Unkwnown	0.04	1.6	0.81	0.02
53.03	79.05	26.03	132.08	C2H2	-0.02	3.47	0.92	0.03
54.05	79.05	25.01	133.1	Unkwnown	0.07	15.82	0.81	0.03
65.02	79.05	14.03	144.07	CH2	-0.03	13.67	0.89	0.03
69.03	79.05	10.02	148.09	Unkwnown	-0.03	5.86	0.84	0.03
73.07	79.05	5.99	152.12	Unkwnown	0.07	0.67	0.84	0.04
78.05	79.05	1.01	157.1	Isotope-1	0.1	14.87	0.88	0.04
33.03	80.05	47.02	113.08	Unkwnown	0	0.01	0.81	0.02
33.05	80.05	47	113.09	Unkwnown	0	0.01	0.8	0.02
41.04	80.05	39.01	121.09	Unkwnown	0	0.03	0.84	0.02
45.03	80.05	35.02	125.08	Unkwnown	0	0.02	0.88	0.02
47.04	80.05	33.01	127.09	Unkwnown	0	0.14	0.82	0.02
47.05	80.05	33	127.1	Unkwnown	0	0.18	0.81	0.02
53.03	80.05	27.02	133.08	Unkwnown	0	0.36	0.85	0.03
57.03	80.05	23.02	137.08	Unkwnown	0	0.2	0.81	0.03
59.05	80.05	21	139.1	Unkwnown	0	0.01	0.84	0.03
59.09	80.05	20.96	139.14	Unkwnown	0	0.22	0.82	0.03
65.02	80.05	15.03	145.07	Unkwnown	-0.01	1.56	0.9	0.03
69.03	80.05	11.02	149.08	Unkwnown	-0.01	0.68	0.85	0.03
73.07	80.05	6.98	153.11	Unkwnown	0	0.08	0.86	0.04
77.06	80.05	2.99	157.11	Isotope-3	0	0.77	0.83	0.04
78.05	80.05	2	158.1	Isotope-2	0.01	1.6	0.83	0.04
79.05	80.05	1	159.1	Isotope-1	0	0.1	0.92	0.04
41.04	82.08	41.04	123.12	Unkwnown	0	0.03	0.82	0.02
57.07	82.08	25.01	139.15	Unkwnown	0	0.07	0.82	0.03
68.05	82.08	14.03	150.13	CH2	0	1.5	0.84	0.03
69.07	82.08	13.01	151.15	Unkwnown	0	0.11	0.81	0.03
81.07	82.08	1.01	163.15	Isotope-1	0	0.08	0.98	0.04
54.05	82.99	28.94	137.04	Unkwnown	0	0.39	0.85	0.03
78.05	82.99	4.94	161.04	Unkwnown	0	0.34	0.86	0.04
31.02	83	51.98	114.02	Unkwnown	-0.16	0.36	0.82	0.02
31.03	83	51.97	114.03	Unkwnown	-0.09	0.51	0.84	0.02
41.04	83	41.96	124.04	Unkwnown	0.03	0.28	0.95	0.02
44.06	83	38.94	127.06	Unkwnown	0.01	14.12	0.84	0.02
45.03	83	37.97	128.03	Unkwnown	0.1	0.15	0.84	0.02
53.03	83	29.97	136.03	Unkwnown	0.05	3.47	0.85	0.03
54.05	83	28.95	137.05	Unkwnown	0.14	17.29	0.82	0.03
57.03	83	25.97	140.03	C2H2	0.1	1.97	0.84	0.03
57.07	83	25.93	140.07	Unkwnown	0.05	0.59	0.96	0.03
68.05	83	14.95	151.05	Unkwnown	0.05	11.76	0.93	0.03
69.03	83	13.97	152.03	CH2	0.03	6.44	0.85	0.03
69.07	83	13.93	152.07	Unkwnown	0.06	0.97	0.98	0.03
71.09	83	11.91	154.09	Unkwnown	0.05	1.23	0.9	0.04
73.07	83	9.94	156.07	Unkwnown	0.13	0.75	0.88	0.04
77.06	83	5.94	160.06	Unkwnown	0.08	7.4	0.85	0.04
78.05	83	4.95	161.05	Unkwnown	0.17	15.4	0.84	0.04
31.02	83.01	51.99	114.03	Unkwnown	-0.01	0.01	0.86	0.02
31.03	83.01	51.98	114.04	Unkwnown	0	0.02	0.87	0.02
33.03	83.01	49.98	116.04	Unkwnown	0	0	0.8	0.02
41.04	83.01	41.97	124.05	Unkwnown	0	0.01	0.8	0.02
43.02	83.01	39.99	126.03	Unkwnown	0	0.01	0.85	0.02
45.03	83.01	37.98	128.04	Unkwnown	0	0.01	0.92	0.02
47.01	83.01	36	130.02	Unkwnown	0	0.02	0.8	0.02
47.04	83.01	35.97	130.05	Unkwnown	0	0.05	0.82	0.02
53.03	83.01	29.98	136.04	Unkwnown	0	0.13	0.83	0.03
57.03	83.01	25.98	140.04	C2H2	0	0.08	0.9	0.03
59.05	83.01	23.96	142.06	Unkwnown	0	0	0.89	0.03
65.02	83.01	17.99	148.03	H2O	0	0.51	0.8	0.03
69.03	83.01	13.98	152.04	CH2	0	0.27	0.91	0.03
73.07	83.01	9.95	156.08	Unkwnown	0	0.03	0.85	0.04
79.05	83.01	3.96	162.06	Isotope-4	0	0.03	0.83	0.04
80.05	83.01	2.96	163.06	Isotope-3	0	0.32	0.86	0.04
83	83.01	0.01	166.01	Resolution	0	0.03	0.86	0.04
31.02	83.05	52.03	114.07	Unkwnown	-0.07	0.12	0.84	0.02
31.03	83.05	52.02	114.08	Unkwnown	-0.05	0.17	0.86	0.02
33.03	83.05	50.02	116.08	Unkwnown	0	0.03	0.83	0.02
33.05	83.05	50	116.09	Unkwnown	0.01	0.04	0.82	0.02
41.04	83.05	42.01	124.09	Unkwnown	0	0.08	0.84	0.02
43.02	83.05	40.03	126.07	Unkwnown	0.01	0.04	0.86	0.02
45.03	83.05	38.02	128.08	Unkwnown	0.01	0.06	0.92	0.02
47.04	83.05	36.01	130.09	Unkwnown	0.01	0.44	0.81	0.02
53.03	83.05	30.02	136.08	Unkwnown	0	1.14	0.85	0.03
57.03	83.05	26.02	140.08	C2H2	0.01	0.7	0.91	0.03
59.05	83.05	24	142.1	Unkwnown	0.02	0.02	0.89	0.03
69.03	83.05	14.02	152.08	CH2	-0.01	2.31	0.93	0.03
69.07	83.05	13.98	152.12	CH2	0.02	0.26	0.81	0.03
73.07	83.05	9.98	156.11	Unkwnown	0.03	0.24	0.85	0.04
79.05	83.05	4	162.1	Isotope-4	0.02	0.29	0.83	0.04
80.05	83.05	3	163.1	Isotope-3	0.02	2.66	0.86	0.04
83	83.05	0.05	166.05	Resolution	-0.01	0.29	0.89	0.04
83.01	83.05	0.04	166.06	Resolution	-0.01	8.22	0.97	0.04
41.04	83.09	42.05	124.13	Unkwnown	-0.01	0.21	0.93	0.02
44.06	83.09	39.02	127.15	Unkwnown	-0.02	10.58	0.83	0.02
53.03	83.09	30.06	136.11	Unkwnown	0.01	2.48	0.8	0.03
54.05	83.09	29.04	137.13	Unkwnown	0.07	12.98	0.8	0.03
57.07	83.09	26.02	140.16	C2H2	0	0.46	0.97	0.03
68.05	83.09	15.04	151.14	Unkwnown	0	9.1	0.94	0.03
69.07	83.09	14.02	152.16	CH2	0	0.75	0.98	0.03
71.09	83.09	12	154.17	C	-0.01	0.98	0.94	0.04
73.07	83.09	10.02	156.15	Unkwnown	0.07	0.55	0.84	0.04
77.06	83.09	6.03	160.15	Unkwnown	0.02	5.56	0.83	0.04
78.05	83.09	5.04	161.13	Unkwnown	0.09	11.48	0.82	0.04
83	83.09	0.09	166.09	Unkwnown	-0.03	0.75	0.99	0.04
83.05	83.09	0.04	166.14	Resolution	0.03	1.87	0.81	0.04
53.94	83.91	29.97	137.85	Unkwnown	0	0.36	0.9	0.03
54.95	83.91	28.96	138.86	Unkwnown	0	1	0.97	0.03
31.02	84.08	53.06	115.1	Unkwnown	-0.02	0.03	0.82	0.02
31.03	84.08	53.05	115.11	Unkwnown	-0.01	0.04	0.83	0.02
41.04	84.08	43.04	125.12	Unkwnown	0	0.02	0.95	0.02
44.06	84.08	40.02	128.14	Unkwnown	0	1.18	0.87	0.02
45.03	84.08	39.05	129.11	Unkwnown	0	0.01	0.82	0.02
47.04	84.08	37.04	131.12	Unkwnown	0	0.11	0.81	0.02
53.03	84.08	31.06	137.11	Unkwnown	0	0.28	0.84	0.03
54.05	84.08	30.04	138.13	Unkwnown	0.01	1.45	0.84	0.03
57.03	84.08	27.05	141.11	Unkwnown	0.01	0.16	0.82	0.03
57.07	84.08	27.01	141.15	Unkwnown	0	0.05	0.96	0.03
68.05	84.08	16.03	152.13	Unkwnown	0	0.98	0.94	0.03
69.03	84.08	15.05	153.11	Unkwnown	0	0.51	0.82	0.03
69.07	84.08	15.01	153.15	Unkwnown	0	0.08	0.98	0.03
71.09	84.08	13	155.17	Unkwnown	0	0.1	0.9	0.04
73.07	84.08	11.02	157.15	Unkwnown	0.01	0.06	0.88	0.04
77.06	84.08	7.02	161.14	Unkwnown	0	0.63	0.88	0.04
78.05	84.08	6.04	162.13	Unkwnown	0.01	1.28	0.85	0.04
80.05	84.08	4.03	164.13	Isotope-4	0.01	0.62	0.8	0.04
82.99	84.08	1.09	167.07	Unkwnown	0	3.04	0.81	0.04
83	84.08	1.08	167.08	Unkwnown	0	0.08	0.99	0.04
83.01	84.08	1.07	167.09	Unkwnown	0	1.75	0.83	0.04
83.05	84.08	1.03	167.13	Isotope-1	0	0.21	0.86	0.04
83.09	84.08	1	167.17	Isotope-1	0	0.1	0.98	0.04
53.94	84.92	30.98	138.86	Unkwnown	0.01	1.27	0.9	0.03
54.95	84.92	29.97	139.87	Unkwnown	0.01	3.05	0.84	0.03
83.91	84.92	1.01	168.83	Isotope-1	0.01	3.06	0.86	0.04
31.02	85.07	54.05	116.08	Unkwnown	-0.03	0.07	0.9	0.02
31.03	85.07	54.04	116.09	Unkwnown	-0.02	0.09	0.91	0.02
33.03	85.07	52.03	118.1	Unkwnown	0.01	0.02	0.86	0.02
33.05	85.07	52.02	118.11	Unkwnown	0.01	0.02	0.86	0.02
41.04	85.07	44.03	126.1	Unkwnown	0.01	0.05	0.92	0.02
43.02	85.07	42.05	128.08	Unkwnown	0.02	0.02	0.87	0.02
44.06	85.07	41	129.13	Unkwnown	0	2.41	0.86	0.02
45.03	85.07	40.03	130.1	Unkwnown	0.01	0.03	0.93	0.02
47.04	85.07	38.03	132.1	Unkwnown	0.01	0.24	0.86	0.02
53.03	85.07	32.04	138.09	Unkwnown	0.01	0.57	0.84	0.03
57.03	85.07	28.03	142.1	C2H4	0.01	0.37	0.94	0.03
57.07	85.07	28	142.14	C2H4	0.01	0.09	0.87	0.03
59.05	85.07	26.02	144.11	C2H2	0.02	0.01	0.83	0.03
59.09	85.07	25.98	144.15	C2H2	0.02	0.35	0.8	0.03
68.05	85.07	17.02	153.11	Unkwnown	0.01	1.81	0.85	0.03
69.03	85.07	16.03	154.1	Unkwnown	0	1.14	0.9	0.03
69.07	85.07	16	154.14	Unkwnown	0.01	0.15	0.89	0.03
71.05	85.07	14.02	156.11	CH2	0.03	0.18	0.81	0.04
71.09	85.07	13.98	156.15	CH2	0.01	0.19	0.81	0.04
73.07	85.07	12	158.13	C	0.02	0.13	0.88	0.04
77.06	85.07	8.01	162.13	Unkwnown	0.01	1.25	0.86	0.04
80.05	85.07	5.02	165.11	Unkwnown	0.02	1.34	0.85	0.04
83	85.07	2.07	168.07	Unkwnown	0	0.15	0.93	0.04
83.01	85.07	2.05	168.08	Isotope-2	0.01	3.86	0.9	0.04
83.05	85.07	2.02	168.11	Isotope-2	0.01	0.47	0.92	0.04
83.09	85.07	1.98	168.15	Isotope-2	0.01	0.19	0.88	0.04
84.08	85.07	0.98	169.15	Isotope-1	0.01	1.87	0.92	0.04
41.04	85.1	44.06	126.14	Unkwnown	0.01	0.12	0.87	0.02
44.06	85.1	41.04	129.16	Unkwnown	0	6.27	0.82	0.02
57.07	85.1	28.03	142.17	C2H4	0.01	0.27	0.95	0.03
68.05	85.1	17.05	153.15	Unkwnown	0.02	5.22	0.89	0.03
69.07	85.1	16.03	154.17	Unkwnown	0.02	0.42	0.92	0.03
71.09	85.1	14.02	156.19	CH2	0	0.64	1	0.04
83	85.1	2.1	168.1	Unkwnown	0	0.41	0.89	0.04
83.09	85.1	2.02	168.19	Isotope-2	0.02	0.56	0.93	0.04
84.08	85.1	1.02	169.18	Isotope-1	0.02	5.03	0.89	0.04
85.07	86.04	0.97	171.1	Isotope-1	0	0.14	0.83	0.04
85.07	86.06	1	171.13	Isotope-1	0.01	0.17	0.83	0.04
86.04	86.06	0.02	172.1	Resolution	0	1.21	0.98	0.04
41	86.1	45.09	127.1	Unkwnown	-0.01	0.96	0.86	0.02
41.04	86.1	45.06	127.14	Unkwnown	0	0.01	0.88	0.02
44.06	86.1	42.03	130.16	Unkwnown	0	0.66	0.87	0.02
54.05	86.1	32.05	140.14	Unkwnown	0	0.79	0.83	0.03
57.07	86.1	29.03	143.17	Unkwnown	0	0.03	0.93	0.03
68.05	86.1	18.05	154.15	H2O	0	0.53	0.92	0.03
69.07	86.1	17.03	155.17	Unkwnown	0	0.04	0.91	0.03
71.09	86.1	15.01	157.18	Unkwnown	0	0.06	0.97	0.04
77.06	86.1	9.04	163.16	Unkwnown	0	0.33	0.83	0.04
83	86.1	3.1	169.1	Unkwnown	0	0.04	0.88	0.04
83.09	86.1	3.01	169.18	Isotope-3	0	0.05	0.91	0.04
84.08	86.1	2.02	170.18	Isotope-2	0	0.49	0.9	0.04
85.1	86.1	1	171.2	Isotope-1	0	0.09	0.96	0.04
31.02	87.04	56.03	118.06	Unkwnown	-0.05	0.09	0.85	0.02
31.03	87.04	56.02	118.07	Unkwnown	-0.04	0.12	0.86	0.02
33.03	87.04	54.01	120.08	Unkwnown	0	0.02	0.82	0.02
33.05	87.04	54	120.09	Unkwnown	0	0.03	0.81	0.02
43.02	87.04	44.03	130.06	Unkwnown	0.01	0.03	0.9	0.02
45.03	87.04	42.01	132.08	Unkwnown	0	0.04	0.93	0.02
47.01	87.04	40.03	134.06	Unkwnown	0	0.09	0.84	0.02
47.04	87.04	40.01	134.08	Unkwnown	0	0.32	0.84	0.02
57.03	87.04	30.01	144.08	Unkwnown	0.01	0.5	0.95	0.03
59.05	87.04	28	146.09	C2H4	0.01	0.02	0.89	0.03
61.03	87.04	26.02	148.07	C2H2	0.02	0.08	0.82	0.03
69.03	87.04	18.01	156.08	H2O	-0.01	1.46	0.85	0.03
71.05	87.04	16	158.09	Unkwnown	0.02	0.25	0.81	0.04
73.07	87.04	13.98	160.11	CH2	0.02	0.16	0.81	0.04
83.01	87.04	4.03	170.05	Isotope-4	0	5.33	0.91	0.04
83.05	87.04	3.99	170.09	Isotope-4	0	0.63	0.92	0.04
85.07	87.04	1.98	172.11	Isotope-2	-0.01	1.22	0.9	0.04
86.04	87.04	1.01	173.08	Isotope-1	-0.01	6.54	0.81	0.04
31.02	87.08	56.06	118.1	Unkwnown	-0.03	0.04	0.86	0.02
31.03	87.08	56.05	118.11	Unkwnown	-0.02	0.06	0.87	0.02
33.03	87.08	54.05	120.11	Unkwnown	-0.01	0.01	0.86	0.02
33.05	87.08	54.04	120.13	Unkwnown	-0.01	0.02	0.85	0.02
41.04	87.08	46.04	128.12	Unkwnown	0	0.03	0.82	0.02
43.02	87.08	44.06	130.1	Unkwnown	0	0.02	0.82	0.02
45.03	87.08	42.05	132.11	Unkwnown	0	0.02	0.94	0.02
47.04	87.08	40.04	134.12	Unkwnown	0	0.16	0.85	0.02
57.03	87.08	30.05	144.11	Unkwnown	0	0.24	0.89	0.03
59.05	87.08	28.03	146.13	C2H4	0	0.01	0.93	0.03
59.09	87.08	27.99	146.17	C2H4	0	0.26	0.88	0.03
65.02	87.08	22.06	152.1	Unkwnown	-0.01	1.58	0.83	0.03
69.03	87.08	18.05	156.11	H2O	-0.01	0.78	0.88	0.03
73.07	87.08	14.02	160.15	CH2	0	0.09	0.92	0.04
77.06	87.08	10.02	164.14	Unkwnown	0	0.82	0.8	0.04
79.05	87.08	8.03	166.13	Unkwnown	0	0.11	0.87	0.04
80.05	87.08	7.03	167.13	Unkwnown	0	1	0.91	0.04
83	87.08	4.08	170.08	Unkwnown	-0.01	0.1	0.83	0.04
83.01	87.08	4.07	170.09	Unkwnown	-0.01	2.77	0.92	0.04
83.05	87.08	4.03	170.13	Isotope-4	0	0.33	0.92	0.04
84.08	87.08	3	171.16	Isotope-3	0	1.18	0.82	0.04
85.07	87.08	2.02	172.15	Isotope-2	-0.01	0.62	0.89	0.04
87.04	87.08	0.04	174.12	Resolution	0	0.47	0.91	0.04
43.02	89.02	46.01	132.04	Unkwnown	0	0.01	0.87	0.02
57.03	89.02	31.99	146.06	Unkwnown	0	0.12	0.81	0.03
61.03	89.02	28	150.05	C2H4	0.01	0.02	0.85	0.03
89.02	89.04	0.02	178.07	Resolution	-0.01	2.87	0.91	0.04
89.02	89.06	0.04	178.08	Resolution	-0.01	3.09	0.84	0.04
89.04	89.06	0.02	178.1	Resolution	0	1.14	0.99	0.04
89.04	89.1	0.05	178.14	Resolution	0	0.23	0.87	0.04
89.06	89.1	0.04	178.16	Resolution	0	0.21	0.92	0.04
89.1	90.06	0.96	179.15	Isotope-1	0	0.17	0.84	0.04
41	91.04	50.04	132.04	Unkwnown	-0.27	18.28	0.82	0.02
41.04	91.04	50	132.08	Unkwnown	-0.06	0.24	0.88	0.02
44.06	91.04	46.98	135.1	Unkwnown	-0.1	13.07	0.87	0.02
54.05	91.04	36.99	145.09	Unkwnown	0.02	15.55	0.82	0.03
57.07	91.04	33.97	148.11	Unkwnown	-0.05	0.5	0.89	0.03
68.05	91.04	22.99	159.09	Unkwnown	-0.05	10.32	0.9	0.03
69.07	91.04	21.97	160.11	Unkwnown	-0.04	0.79	0.89	0.03
71.09	91.04	19.95	162.13	Unkwnown	-0.04	0.98	0.8	0.04
73.07	91.04	17.97	164.1	H2O	0.01	0.69	0.89	0.04
77.06	91.04	13.98	168.1	CH2	-0.06	7.43	0.94	0.04
78.05	91.04	12.99	169.09	Unkwnown	0.05	14.16	0.86	0.04
80.05	91.04	10.99	171.09	Unkwnown	0.01	6.89	0.8	0.04
83	91.04	8.04	174.04	Unkwnown	-0.06	0.75	0.84	0.04
83.09	91.04	7.95	174.13	Unkwnown	-0.03	0.98	0.84	0.04
84.08	91.04	6.96	175.12	Unkwnown	-0.03	9.38	0.85	0.04
85.07	91.04	5.97	176.1	Unkwnown	-0.06	4.37	0.81	0.04
41	91.05	50.05	132.05	Unkwnown	-0.32	21.6	0.83	0.02
41.04	91.05	50.01	132.09	Unkwnown	-0.08	0.28	0.88	0.02
44.06	91.05	46.99	135.11	Unkwnown	-0.12	15.3	0.86	0.02
54.05	91.05	37	145.1	Unkwnown	0.02	18.15	0.81	0.03
57.07	91.05	33.98	148.12	Unkwnown	-0.06	0.58	0.89	0.03
68.05	91.05	23	159.1	Unkwnown	-0.06	12.13	0.91	0.03
69.07	91.05	21.98	160.12	Unkwnown	-0.04	0.92	0.88	0.03
71.09	91.05	19.96	162.14	Unkwnown	-0.05	1.16	0.81	0.04
73.07	91.05	17.99	164.12	H2O	0.01	0.8	0.88	0.04
77.06	91.05	13.99	168.11	CH2	-0.07	8.73	0.94	0.04
78.05	91.05	13	169.1	Unkwnown	0.05	16.43	0.85	0.04
83	91.05	8.05	174.05	Unkwnown	-0.07	0.87	0.83	0.04
83.09	91.05	7.96	174.14	Unkwnown	-0.03	1.14	0.84	0.04
84.08	91.05	6.97	175.13	Unkwnown	-0.04	10.91	0.85	0.04
91.04	91.05	0.01	182.09	Resolution	0	1.17	1	0.05
41	91.06	50.06	132.06	Unkwnown	-0.33	22.42	0.83	0.02
41.04	91.06	50.02	132.1	Unkwnown	-0.08	0.29	0.87	0.02
44.06	91.06	47	135.12	Unkwnown	-0.13	15.81	0.86	0.02
54.05	91.06	37.01	145.1	Unkwnown	0.02	18.72	0.81	0.03
57.07	91.06	33.99	148.13	Unkwnown	-0.06	0.6	0.88	0.03
68.05	91.06	23.01	159.11	Unkwnown	-0.07	12.55	0.9	0.03
69.07	91.06	21.99	160.13	Unkwnown	-0.05	0.95	0.88	0.03
71.09	91.06	19.97	162.14	Unkwnown	-0.05	1.21	0.81	0.04
73.07	91.06	17.99	164.12	H2O	0.01	0.82	0.88	0.04
77.06	91.06	14	168.12	CH2	-0.07	9.03	0.94	0.04
78.05	91.06	13.01	169.1	Unkwnown	0.05	16.88	0.85	0.04
83	91.06	8.06	174.06	Unkwnown	-0.08	0.89	0.82	0.04
83.09	91.06	7.97	174.14	Unkwnown	-0.03	1.18	0.83	0.04
84.08	91.06	6.98	175.14	Unkwnown	-0.04	11.21	0.84	0.04
91.04	91.06	0.02	182.1	Resolution	0	1.21	1	0.05
91.05	91.06	0.01	182.11	Resolution	0	1.03	1	0.05
41.04	92.06	51.02	133.1	Unkwnown	-0.01	0.04	0.85	0.02
44.06	92.06	48	136.12	Unkwnown	-0.02	2.15	0.83	0.02
45.03	92.06	47.03	137.1	Unkwnown	-0.01	0.02	0.8	0.02
47.05	92.06	45.01	139.11	Unkwnown	-0.01	0.27	0.84	0.02
47.06	92.06	45	139.12	Unkwnown	-0.01	0.32	0.83	0.02
53.03	92.06	39.04	145.09	Unkwnown	-0.01	0.53	0.84	0.03
54.05	92.06	38.02	146.11	Unkwnown	0	2.69	0.82	0.03
57.07	92.06	34.99	149.13	Unkwnown	-0.01	0.08	0.81	0.03
65.02	92.06	27.04	157.08	Unkwnown	-0.02	2.22	0.88	0.03
73.07	92.06	19	165.13	Unkwnown	0	0.12	0.87	0.04
77.06	92.06	15	169.12	Unkwnown	-0.01	1.16	0.86	0.04
78.05	92.06	14.02	170.11	CH2	0	2.43	0.86	0.04
79.05	92.06	13.01	171.12	Unkwnown	-0.01	0.15	0.88	0.04
80.05	92.06	12.01	172.11	C	0	1.3	0.89	0.04
87.08	92.06	4.98	179.14	Unkwnown	0	1.07	0.81	0.04
91.04	92.06	1.02	183.1	Isotope-1	0	0.16	0.92	0.05
91.05	92.06	1.01	183.11	Isotope-1	0	0.13	0.9	0.05
91.06	92.06	1	183.12	Isotope-1	0	0.13	0.9	0.05
68.05	93.03	24.98	161.08	Unkwnown	0.18	122.89	0.81	0.03
75.04	93.03	17.99	168.08	H2O	0.17	1.37	0.83	0.04
75.07	93.03	17.97	168.1	H2O	0.31	14.31	0.82	0.04
77.06	93.03	15.97	170.09	Unkwnown	-0.06	95.44	0.88	0.04
91.04	93.03	1.99	184.07	Isotope-2	0.83	11.68	0.87	0.05
91.05	93.03	1.98	184.08	Isotope-2	0.84	10.08	0.88	0.05
91.06	93.03	1.97	184.09	Isotope-2	0.84	9.77	0.88	0.05
41	93.07	52.07	134.07	Unkwnown	-1.06	86.87	0.83	0.02
41.04	93.07	52.03	134.11	Unkwnown	-0.05	1.08	0.84	0.02
44.06	93.07	49.01	137.13	Unkwnown	-0.27	61.49	0.86	0.02
57.07	93.07	36	150.14	Unkwnown	0.05	2.17	0.83	0.03
68.05	93.07	25.02	161.12	Unkwnown	0.03	45.49	0.85	0.03
69.07	93.07	24	162.14	Unkwnown	0.11	3.42	0.82	0.03
73.07	93.07	20.01	166.14	Unkwnown	0.31	3	0.82	0.04
77.06	93.07	16.01	170.13	Unkwnown	-0.09	36.15	0.95	0.04
78.05	93.07	15.02	171.12	Unkwnown	0.46	61.95	0.81	0.04
91.04	93.07	2.03	184.11	Isotope-2	0.24	4.53	0.95	0.05
91.05	93.07	2.02	184.12	Isotope-2	0.24	3.87	0.95	0.05
91.06	93.07	2.01	184.13	Isotope-2	0.25	3.75	0.95	0.05
92.06	93.07	1.01	185.13	Isotope-1	0.36	24.49	0.87	0.05
93.03	93.07	0.04	186.1	Resolution	0.09	0.32	0.92	0.05
68.05	94.04	25.99	162.09	C2H2	0.02	9.55	0.81	0.03
75.04	94.04	19	169.09	Unkwnown	0.02	0.1	0.81	0.04
75.07	94.04	18.97	169.11	Unkwnown	0.03	1.09	0.81	0.04
77.06	94.04	16.98	171.1	Unkwnown	0	7.35	0.9	0.04
91.04	94.04	3	185.08	Isotope-3	0.07	0.9	0.88	0.05
91.05	94.04	2.99	185.09	Isotope-3	0.07	0.78	0.89	0.05
91.06	94.04	2.98	185.1	Isotope-3	0.07	0.75	0.89	0.05
93.03	94.04	1.01	187.07	Isotope-1	0.01	0.08	0.99	0.05
93.07	94.04	0.97	187.11	Isotope-1	0.02	0.2	0.93	0.05
41	95.05	54.05	136.05	Unkwnown	-0.33	31.73	0.81	0.02
41.04	95.05	54.01	136.09	Unkwnown	0.05	0.38	0.81	0.02
44.06	95.05	50.99	139.11	Unkwnown	-0.03	21.65	0.82	0.02
52.01	95.05	43.04	147.06	Unkwnown	0.28	63.27	0.8	0.03
57.07	95.05	37.98	152.12	Unkwnown	0.06	0.82	0.85	0.03
68.05	95.05	27	163.1	Unkwnown	0.04	17.82	0.89	0.03
69.07	95.05	25.98	164.12	C2H2	0.08	1.33	0.85	0.03
71.09	95.05	23.96	166.14	Unkwnown	0.05	1.83	0.84	0.04
75.04	95.05	20.01	170.09	Unkwnown	0.06	0.19	0.85	0.04
75.07	95.05	19.98	170.12	Unkwnown	0.07	2.01	0.86	0.04
77.06	95.05	17.99	172.11	H2O	0.03	12.86	0.92	0.04
83.09	95.05	11.96	178.14	C	0.09	1.67	0.81	0.04
84.08	95.05	10.97	179.13	Unkwnown	0.09	15.61	0.81	0.04
85.1	95.05	9.95	180.15	Unkwnown	0.06	2.77	0.82	0.04
86.1	95.05	8.95	181.15	Unkwnown	0.13	29.21	0.83	0.04
91.04	95.05	4.01	186.09	Isotope-4	0.15	1.59	0.91	0.05
91.05	95.05	4	186.1	Isotope-4	0.15	1.37	0.92	0.05
91.06	95.05	3.99	186.11	Isotope-4	0.15	1.33	0.92	0.05
93.03	95.05	2.02	188.08	Isotope-2	0.07	0.12	0.98	0.05
93.07	95.05	1.98	188.12	Isotope-2	0.08	0.34	0.94	0.05
94.04	95.05	1.01	189.09	Isotope-1	0.05	1.66	0.98	0.05
41	95.09	54.08	136.09	Unkwnown	-0.28	23.81	0.82	0.02
41.04	95.09	54.05	136.13	Unkwnown	-0.01	0.31	0.88	0.02
44.06	95.09	51.02	139.15	Unkwnown	-0.05	16.13	0.82	0.02
54.05	95.09	41.04	149.13	Unkwnown	0.09	19.99	0.8	0.03
57.07	95.09	38.02	152.16	Unkwnown	-0.01	0.67	0.92	0.03
68.05	95.09	27.04	163.14	Unkwnown	0	13.68	0.92	0.03
69.07	95.09	26.02	164.16	C2H2	0.02	1.05	0.91	0.03
71.09	95.09	24	166.17	Unkwnown	-0.02	1.5	0.93	0.04
81.07	95.09	14.02	176.16	CH2	0.07	0.61	0.86	0.04
82.08	95.09	13.01	177.16	Unkwnown	0.03	7.73	0.91	0.04
83	95.09	12.09	178.09	Unkwnown	-0.01	0.97	0.84	0.04
83.09	95.09	12	178.17	C	0.02	1.35	0.89	0.04
84.08	95.09	11.01	179.17	Unkwnown	0.03	12.16	0.85	0.04
85.1	95.09	9.99	180.19	Unkwnown	-0.01	2.32	0.92	0.04
86.1	95.09	8.99	181.18	Unkwnown	0.05	23.51	0.9	0.04
91.05	95.09	4.04	186.14	Isotope-4	0.11	0.87	0.8	0.05
91.06	95.09	4.03	186.14	Isotope-4	0.11	0.85	0.8	0.05
41	96.06	55.06	137.06	Unkwnown	-0.02	2.08	0.88	0.02
41.04	96.06	55.02	137.1	Unkwnown	0	0.03	0.91	0.02
44.06	96.06	52	140.12	Unkwnown	0	1.44	0.9	0.02
54.05	96.06	42.01	150.1	Unkwnown	0.01	1.68	0.83	0.03
57.07	96.06	38.99	153.13	Unkwnown	0	0.06	0.94	0.03
68.05	96.06	28.01	164.11	C2H4	0	1.17	0.96	0.03
69.07	96.06	26.99	165.13	Unkwnown	0	0.09	0.93	0.03
71.09	96.06	24.97	167.14	Unkwnown	0	0.12	0.93	0.04
75.04	96.06	21.01	171.1	Unkwnown	0.01	0.01	0.81	0.04
75.07	96.06	20.99	171.13	Unkwnown	0.01	0.12	0.83	0.04
77.06	96.06	19	173.12	Unkwnown	0	0.78	0.93	0.04
82.08	96.06	13.98	178.14	CH2	0.01	0.58	0.84	0.04
83	96.06	13.06	179.06	Unkwnown	0	0.08	0.87	0.04
83.09	96.06	12.97	179.14	Unkwnown	0	0.11	0.9	0.04
84.08	96.06	11.98	180.14	C	0	1.05	0.89	0.04
85.07	96.06	10.99	181.12	Unkwnown	0	0.46	0.81	0.04
85.1	96.06	10.96	181.16	Unkwnown	0	0.19	0.9	0.04
86.1	96.06	9.96	182.15	Unkwnown	0.01	1.96	0.92	0.04
91.04	96.06	5.02	187.1	Unkwnown	0.01	0.1	0.92	0.05
91.05	96.06	5.01	187.11	Unkwnown	0.01	0.08	0.93	0.05
91.06	96.06	5	187.12	Unkwnown	0.01	0.08	0.93	0.05
93.03	96.06	3.02	189.09	Isotope-3	0.01	0.01	0.88	0.05
93.07	96.06	2.99	189.13	Isotope-3	0.01	0.02	0.91	0.05
94.04	96.06	2.02	190.1	Isotope-2	0.01	0.09	0.88	0.05
95.05	96.06	1.01	191.11	Isotope-1	0	0.06	0.95	0.05
95.09	96.06	0.97	191.14	Isotope-1	0.01	0.07	0.93	0.05
31.02	97.04	66.02	128.06	Unkwnown	-0.03	0.07	0.83	0.02
31.03	97.04	66.01	128.07	Unkwnown	-0.02	0.1	0.85	0.02
33.03	97.04	64.01	130.07	Unkwnown	0.01	0.02	0.82	0.02
33.05	97.04	64	130.09	Unkwnown	0.01	0.03	0.82	0.02
41.04	97.04	56	138.08	Unkwnown	0.01	0.05	0.82	0.02
43.02	97.04	54.02	140.06	Unkwnown	0.02	0.03	0.83	0.02
45.03	97.04	52.01	142.07	Unkwnown	0.02	0.03	0.9	0.02
47.04	97.04	50	144.08	Unkwnown	0.01	0.27	0.83	0.02
57.03	97.04	40.01	154.07	Unkwnown	0.02	0.42	0.91	0.03
59.05	97.04	37.99	156.09	Unkwnown	0.02	0.01	0.86	0.03
69.03	97.04	28.01	166.07	C2H4	0	1.44	0.95	0.03
73.07	97.04	23.98	170.11	Unkwnown	0.03	0.15	0.88	0.04
79.05	97.04	17.99	176.09	H2O	0.02	0.17	0.8	0.04
80.05	97.04	16.99	177.09	Unkwnown	0.02	1.61	0.85	0.04
83	97.04	14.04	180.04	CH2	0.01	0.17	0.86	0.04
83.01	97.04	14.03	180.05	CH2	0.01	4.71	0.92	0.04
83.05	97.04	13.99	180.09	CH2	0.01	0.56	0.92	0.04
84.08	97.04	12.96	181.12	Unkwnown	0.02	2.04	0.83	0.04
85.07	97.04	11.98	182.11	C	0	1.09	0.91	0.04
87.04	97.04	10	184.08	Unkwnown	0.01	0.79	0.9	0.04
87.08	97.04	9.96	184.12	Unkwnown	0.02	1.56	0.91	0.04
31.02	97.07	66.05	128.08	Unkwnown	-0.05	0.1	0.85	0.02
31.03	97.07	66.04	128.09	Unkwnown	-0.03	0.13	0.86	0.02
33.03	97.07	64.03	130.1	Unkwnown	0.01	0.02	0.8	0.02
33.05	97.07	64.02	130.11	Unkwnown	0.01	0.03	0.81	0.02
41.04	97.07	56.03	138.1	Unkwnown	0	0.07	0.93	0.02
43.02	97.07	54.05	140.08	Unkwnown	0.02	0.03	0.81	0.02
44.06	97.07	53	141.13	Unkwnown	0	3.64	0.84	0.02
45.03	97.07	52.03	142.1	Unkwnown	0.01	0.04	0.88	0.02
47.04	97.07	50.03	144.1	Unkwnown	0.01	0.35	0.82	0.02
53.03	97.07	44.04	150.09	Unkwnown	0	0.93	0.88	0.03
57.03	97.07	40.03	154.1	Unkwnown	0.02	0.54	0.89	0.03
57.07	97.07	40	154.14	Unkwnown	0.01	0.15	0.91	0.03
59.05	97.07	38.02	156.11	Unkwnown	0.03	0.02	0.8	0.03
65.02	97.07	32.05	162.09	Unkwnown	0.01	3.41	0.8	0.03
68.05	97.07	29.02	165.11	Unkwnown	0.01	2.92	0.89	0.03
69.03	97.07	28.03	166.1	C2H4	-0.01	1.81	0.93	0.03
69.07	97.07	28	166.14	C2H4	0.01	0.24	0.93	0.03
71.09	97.07	25.98	168.15	C2H2	0.01	0.29	0.83	0.04
73.07	97.07	24	170.13	Unkwnown	0.03	0.2	0.9	0.04
77.06	97.07	20.01	174.13	Unkwnown	0.01	1.87	0.83	0.04
78.05	97.07	19.02	175.11	Unkwnown	0.04	3.8	0.8	0.04
79.05	97.07	18.01	176.12	H2O	0.02	0.22	0.82	0.04
80.05	97.07	17.02	177.11	Unkwnown	0.02	2.04	0.83	0.04
83	97.07	14.07	180.07	Unkwnown	-0.01	0.25	0.97	0.04
83.01	97.07	14.06	180.08	CH2	0	5.95	0.89	0.04
83.05	97.07	14.02	180.11	CH2	0.01	0.73	0.93	0.04
83.09	97.07	13.98	180.15	CH2	0.01	0.31	0.93	0.04
84.08	97.07	12.98	181.15	Unkwnown	0.01	2.99	0.95	0.04
85.07	97.07	12	182.13	C	-0.01	1.48	0.95	0.04
85.1	97.07	11.96	182.17	C	0.01	0.45	0.81	0.04
86.1	97.07	10.97	183.16	Unkwnown	0.02	4.63	0.81	0.04
87.04	97.07	10.02	184.11	Unkwnown	0.01	0.97	0.85	0.04
87.08	97.07	9.99	184.15	Unkwnown	0.02	1.92	0.87	0.04
91.04	97.07	6.03	188.1	Unkwnown	0.03	0.23	0.82	0.05
91.05	97.07	6.02	188.12	Unkwnown	0.03	0.2	0.81	0.05
91.06	97.07	6.01	188.12	Unkwnown	0.03	0.19	0.8	0.05
92.06	97.07	5	189.13	Unkwnown	0.03	1.34	0.8	0.05
95.09	97.07	1.98	192.15	Isotope-2	0.02	0.17	0.8	0.05
96.06	97.07	1.01	193.12	Isotope-1	0.01	2.24	0.83	0.05
97.04	97.07	0.02	194.11	Resolution	0	1.2	0.92	0.05
41.04	97.1	56.06	138.14	Unkwnown	-0.01	0.17	0.9	0.02
44.06	97.1	53.04	141.16	Unkwnown	-0.03	8.58	0.81	0.02
57.07	97.1	40.03	154.17	Unkwnown	-0.01	0.38	0.96	0.03
68.05	97.1	29.05	165.15	Unkwnown	-0.01	7.54	0.93	0.03
69.07	97.1	28.03	166.17	C2H4	-0.01	0.61	0.97	0.03
71.09	97.1	26.02	168.19	C2H2	-0.02	0.84	0.96	0.04
75.04	97.1	22.06	172.15	Unkwnown	0.01	0.07	0.82	0.04
77.06	97.1	20.04	174.16	Unkwnown	0.01	4.48	0.81	0.04
83	97.1	14.1	180.1	Unkwnown	-0.03	0.6	0.95	0.04
83.09	97.1	14.02	180.19	CH2	-0.01	0.82	0.99	0.04
84.08	97.1	13.02	181.18	Unkwnown	-0.01	7.38	0.95	0.04
85.07	97.1	12.04	182.17	C	-0.02	3.12	0.82	0.04
85.1	97.1	12	182.2	C	-0.02	1.32	0.96	0.04
86.1	97.1	11.01	183.2	Unkwnown	0.02	13.2	0.93	0.04
91.04	97.1	6.06	188.14	Unkwnown	0.05	0.57	0.83	0.05
91.05	97.1	6.05	188.15	Unkwnown	0.05	0.49	0.83	0.05
91.06	97.1	6.04	188.16	Unkwnown	0.05	0.47	0.83	0.05
95.05	97.1	2.05	192.15	Isotope-2	0.01	0.33	0.83	0.05
95.09	97.1	2.02	192.19	Isotope-2	0.01	0.49	0.91	0.05
96.06	97.1	1.04	193.16	Isotope-1	-0.01	6.02	0.91	0.05
97.07	97.1	0.04	194.17	Resolution	0	2.16	0.88	0.05
45.03	98.98	53.94	144.01	Unkwnown	0	0.01	0.82	0.02
47.01	98.98	51.96	145.99	Unkwnown	0	0.02	0.87	0.02
57.03	98.98	41.94	156.01	Unkwnown	0	0.11	0.81	0.03
83.01	98.98	15.97	181.99	Unkwnown	0	1.21	0.84	0.04
83.05	98.98	15.93	182.02	Unkwnown	0	0.14	0.81	0.04
87.04	98.98	11.93	186.02	Unkwnown	0	0.22	0.9	0.04
87.08	98.98	11.9	186.06	Unkwnown	0.01	0.39	0.81	0.04
31.02	99.08	68.06	130.1	Unkwnown	-0.03	0.06	0.89	0.02
31.03	99.08	68.05	130.11	Unkwnown	-0.02	0.08	0.9	0.02
33.03	99.08	66.05	132.11	Unkwnown	0	0.01	0.86	0.02
33.05	99.08	66.04	132.13	Unkwnown	0	0.02	0.87	0.02
41.04	99.08	58.04	140.12	Unkwnown	0	0.04	0.93	0.02
43.02	99.08	56.06	142.1	Unkwnown	0.01	0.02	0.85	0.02
44.06	99.08	55.02	143.14	Unkwnown	0	2.15	0.89	0.02
45.03	99.08	54.05	144.11	Unkwnown	0.01	0.02	0.9	0.02
47.04	99.08	52.04	146.12	Unkwnown	0.01	0.2	0.84	0.02
53.03	99.08	46.05	152.11	Unkwnown	0.01	0.48	0.83	0.03
57.03	99.08	42.05	156.11	Unkwnown	0.01	0.31	0.92	0.03
57.07	99.08	42.01	156.15	Unkwnown	0.01	0.08	0.89	0.03
68.05	99.08	31.03	167.13	Unkwnown	0.01	1.61	0.88	0.03
69.03	99.08	30.05	168.11	Unkwnown	0	0.94	0.86	0.03
69.07	99.08	30.01	168.15	Unkwnown	0.01	0.13	0.91	0.03
71.05	99.08	28.03	170.13	C2H4	0.02	0.16	0.81	0.04
71.09	99.08	27.99	170.17	C2H4	0.01	0.17	0.84	0.04
73.07	99.08	26.02	172.15	C2H2	0.02	0.11	0.86	0.04
77.06	99.08	22.02	176.14	Unkwnown	0.01	1.12	0.89	0.04
80.05	99.08	19.03	179.13	Unkwnown	0.01	1.13	0.83	0.04
83	99.08	16.08	182.08	Unkwnown	0	0.13	0.93	0.04
83.01	99.08	16.07	182.09	Unkwnown	0	3.2	0.86	0.04
83.05	99.08	16.03	182.13	Unkwnown	0.01	0.39	0.89	0.04
83.09	99.08	15.99	182.17	Unkwnown	0.01	0.17	0.89	0.04
84.08	99.08	15	183.16	Unkwnown	0.01	1.63	0.92	0.04
85.07	99.08	14.02	184.15	CH2	0	0.85	0.98	0.04
85.1	99.08	13.98	184.18	CH2	0.01	0.25	0.82	0.04
86.04	99.08	13.04	185.12	Unkwnown	0	4.21	0.82	0.04
86.06	99.08	13.02	185.14	Unkwnown	-0.01	3.4	0.82	0.04
86.1	99.08	12.98	185.18	Unkwnown	0.01	2.67	0.83	0.04
87.04	99.08	12.04	186.12	C	0.01	0.54	0.85	0.04
87.08	99.08	12	186.16	C	0.01	1.06	0.86	0.04
91.04	99.08	8.04	190.12	Unkwnown	0.02	0.13	0.83	0.05
91.05	99.08	8.03	190.13	Unkwnown	0.02	0.11	0.82	0.05
91.06	99.08	8.02	190.14	Unkwnown	0.02	0.11	0.81	0.05
96.06	99.08	3.02	195.14	Isotope-3	0.01	1.27	0.85	0.05
97.04	99.08	2.04	196.12	Isotope-2	0	0.64	0.88	0.05
97.07	99.08	2.02	196.15	Isotope-2	0	0.52	0.94	0.05
97.1	99.08	1.98	196.18	Isotope-2	0.01	0.19	0.84	0.05
31.02	99.09	68.07	130.11	Unkwnown	-0.03	0.07	0.83	0.02
31.03	99.09	68.06	130.12	Unkwnown	-0.02	0.09	0.84	0.02
41.04	99.09	58.05	140.13	Unkwnown	0	0.05	0.93	0.02
44.06	99.09	55.03	143.15	Unkwnown	0	2.72	0.87	0.02
45.03	99.09	54.06	144.13	Unkwnown	0.01	0.03	0.83	0.02
47.04	99.09	52.06	146.13	Unkwnown	0.01	0.25	0.8	0.02
53.03	99.09	46.07	152.12	Unkwnown	0.01	0.61	0.82	0.03
57.03	99.09	42.06	156.13	Unkwnown	0.01	0.37	0.85	0.03
57.07	99.09	42.02	156.16	Unkwnown	0	0.11	0.94	0.03
68.05	99.09	31.04	167.14	Unkwnown	0.01	2.14	0.9	0.03
69.03	99.09	30.06	168.13	Unkwnown	0	1.13	0.81	0.03
69.07	99.09	30.02	168.16	Unkwnown	0.01	0.18	0.95	0.03
71.09	99.09	28.01	170.18	C2H4	0	0.24	0.93	0.04
73.07	99.09	26.03	172.16	C2H2	0.02	0.13	0.83	0.04
77.06	99.09	22.03	176.15	Unkwnown	0.01	1.4	0.86	0.04
83	99.09	16.09	182.09	Unkwnown	0	0.18	0.95	0.04
83.05	99.09	16.04	182.14	Unkwnown	0.01	0.47	0.83	0.04
83.09	99.09	16.01	182.18	Unkwnown	0.01	0.23	0.95	0.04
84.08	99.09	15.01	183.17	Unkwnown	0.01	2.17	0.95	0.04
85.07	99.09	14.03	184.16	CH2	0	1.06	0.95	0.04
85.1	99.09	13.99	184.19	CH2	0	0.37	0.93	0.04
86.1	99.09	13	185.19	Unkwnown	0.01	3.78	0.91	0.04
91.04	99.09	8.05	190.13	Unkwnown	0.02	0.17	0.83	0.05
91.05	99.09	8.04	190.14	Unkwnown	0.02	0.14	0.82	0.05
91.06	99.09	8.03	190.15	Unkwnown	0.02	0.14	0.82	0.05
95.05	99.09	4.04	194.14	Isotope-4	0.01	0.09	0.8	0.05
95.09	99.09	4.01	194.18	Isotope-4	0.01	0.13	0.83	0.05
96.06	99.09	3.04	195.15	Isotope-3	0.01	1.71	0.88	0.05
97.04	99.09	2.05	196.13	Isotope-2	0.01	0.76	0.81	0.05
97.07	99.09	2.03	196.16	Isotope-2	0	0.67	0.93	0.05
97.1	99.09	1.99	196.19	Isotope-2	0.01	0.27	0.93	0.05
99.08	99.09	0.01	198.17	Resolution	0	1.24	0.96	0.05
41.04	99.1	58.07	140.14	Unkwnown	0	0.06	0.91	0.02
44.06	99.1	55.04	143.17	Unkwnown	0	2.84	0.84	0.02
57.07	99.1	42.03	156.17	Unkwnown	0	0.12	0.95	0.03
68.05	99.1	31.06	167.15	Unkwnown	0.01	2.29	0.89	0.03
69.07	99.1	30.03	168.17	Unkwnown	0.01	0.19	0.94	0.03
71.09	99.1	28.02	170.19	C2H4	0	0.27	0.96	0.04
77.06	99.1	22.04	176.16	Unkwnown	0.01	1.46	0.82	0.04
83	99.1	16.1	182.1	Unkwnown	0	0.19	0.94	0.04
83.09	99.1	16.02	182.19	Unkwnown	0.01	0.25	0.95	0.04
84.08	99.1	15.02	183.19	Unkwnown	0.01	2.32	0.94	0.04
85.07	99.1	14.04	184.17	CH2	0	1.08	0.89	0.04
85.1	99.1	14	184.21	CH2	0	0.43	0.97	0.04
86.1	99.1	13.01	185.2	Unkwnown	0.01	4.22	0.94	0.04
91.04	99.1	8.07	190.14	Unkwnown	0.02	0.18	0.8	0.05
95.09	99.1	4.02	194.19	Isotope-4	0.01	0.14	0.85	0.05
96.06	99.1	3.05	195.16	Isotope-3	0.01	1.85	0.88	0.05
97.07	99.1	2.04	196.17	Isotope-2	0.01	0.7	0.89	0.05
97.1	99.1	2	196.21	Isotope-2	0.01	0.3	0.95	0.05
99.08	99.1	0.02	198.18	Resolution	0	1.27	0.91	0.05
99.09	99.1	0.01	198.2	Resolution	0	1.07	0.99	0.05
41.04	99.12	58.08	140.16	Unkwnown	0	0.05	0.86	0.02
44.06	99.12	55.06	143.18	Unkwnown	0	2.58	0.8	0.02
57.07	99.12	42.05	156.19	Unkwnown	0	0.11	0.93	0.03
68.05	99.12	31.07	167.17	Unkwnown	0.01	2.13	0.87	0.03
69.07	99.12	30.05	168.19	Unkwnown	0.01	0.17	0.91	0.03
71.09	99.12	28.03	170.2	C2H4	0	0.26	0.98	0.04
83	99.12	16.12	182.12	Unkwnown	0	0.17	0.88	0.04
83.09	99.12	16.03	182.2	Unkwnown	0.01	0.23	0.92	0.04
84.08	99.12	15.04	183.2	Unkwnown	0.01	2.09	0.89	0.04
85.07	99.12	14.05	184.18	CH2	0	0.94	0.81	0.04
85.1	99.12	14.02	184.22	CH2	0	0.41	0.99	0.04
86.1	99.12	13.02	185.21	Unkwnown	0.01	4.07	0.94	0.04
95.09	99.12	4.03	194.2	Isotope-4	0.01	0.14	0.87	0.05
96.06	99.12	3.06	195.17	Isotope-3	0	1.76	0.87	0.05
97.07	99.12	2.05	196.18	Isotope-2	0.01	0.61	0.82	0.05
97.1	99.12	2.02	196.22	Isotope-2	0.01	0.29	0.94	0.05
99.08	99.12	0.04	198.2	Resolution	0	1.12	0.84	0.05
99.09	99.12	0.03	198.21	Resolution	0	0.98	0.95	0.05
99.1	99.12	0.01	198.22	Resolution	0	0.94	0.99	0.05
31.02	101.06	70.04	132.08	Unkwnown	-0.04	0.06	0.84	0.02
31.03	101.06	70.03	132.09	Unkwnown	-0.03	0.09	0.85	0.02
33.03	101.06	68.03	134.09	Unkwnown	0	0.02	0.83	0.02
33.05	101.06	68.02	134.11	Unkwnown	0	0.02	0.81	0.02
43.02	101.06	58.04	144.08	Unkwnown	0	0.02	0.89	0.02
45.03	101.06	56.03	146.09	Unkwnown	0	0.03	0.92	0.02
47.01	101.06	54.05	148.07	Unkwnown	0	0.07	0.83	0.02
47.04	101.06	54.02	148.1	Unkwnown	0	0.23	0.82	0.02
57.03	101.06	44.03	158.09	Unkwnown	0	0.37	0.93	0.03
59.05	101.06	42.01	160.11	Unkwnown	0.01	0.01	0.9	0.03
61.03	101.06	40.03	162.09	Unkwnown	0.01	0.06	0.81	0.03
69.03	101.06	32.03	170.09	Unkwnown	-0.01	1.06	0.82	0.03
73.07	101.06	28	174.13	C2H4	0.01	0.12	0.81	0.04
83.01	101.06	18.05	184.07	H2O	-0.01	3.98	0.9	0.04
83.05	101.06	18.01	184.11	H2O	0	0.47	0.91	0.04
85.07	101.06	16	186.13	Unkwnown	-0.01	0.91	0.89	0.04
87.04	101.06	14.02	188.1	CH2	0	0.74	0.99	0.04
87.08	101.06	13.98	188.14	CH2	0.01	1.33	0.91	0.04
97.04	101.06	4.02	198.1	Isotope-4	-0.01	0.76	0.88	0.05
97.07	101.06	4	198.13	Isotope-4	0	0.55	0.83	0.05
98.98	101.06	2.09	200.04	Unkwnown	0	2.7	0.88	0.05
99.08	101.06	1.98	200.14	Isotope-2	0	0.99	0.84	0.05
31.02	101.1	70.08	132.11	Unkwnown	-0.02	0.02	0.91	0.02
31.03	101.1	70.07	132.13	Unkwnown	-0.01	0.03	0.92	0.02
33.03	101.1	68.06	134.13	Unkwnown	0	0.01	0.87	0.02
33.05	101.1	68.05	134.14	Unkwnown	0	0.01	0.87	0.02
41.04	101.1	60.06	142.14	Unkwnown	0	0.02	0.85	0.02
43.02	101.1	58.08	144.11	Unkwnown	0	0.01	0.87	0.02
44.06	101.1	57.03	145.16	Unkwnown	0	0.83	0.81	0.02
45.03	101.1	56.06	146.13	Unkwnown	0	0.01	0.93	0.02
47.01	101.1	54.08	148.11	Unkwnown	0	0.02	0.8	0.02
47.04	101.1	54.06	148.13	Unkwnown	0	0.09	0.86	0.02
57.03	101.1	44.06	158.13	Unkwnown	0	0.13	0.94	0.03
59.05	101.1	42.05	160.15	Unkwnown	0	0	0.89	0.03
59.09	101.1	42.01	160.18	Unkwnown	0	0.13	0.85	0.03
61.03	101.1	40.07	162.12	Unkwnown	0	0.02	0.8	0.03
68.05	101.1	33.05	169.15	Unkwnown	0	0.63	0.81	0.03
69.03	101.1	32.06	170.13	Unkwnown	0	0.39	0.85	0.03
69.07	101.1	32.03	170.17	Unkwnown	0	0.05	0.84	0.03
73.07	101.1	28.03	174.16	C2H4	0	0.05	0.91	0.04
77.06	101.1	24.04	178.16	Unkwnown	0	0.46	0.86	0.04
80.05	101.1	21.05	181.15	Unkwnown	0	0.49	0.86	0.04
83	101.1	18.1	184.1	Unkwnown	0	0.05	0.89	0.04
83.01	101.1	18.09	184.11	Unkwnown	0	1.44	0.92	0.04
83.05	101.1	18.05	184.15	H2O	0	0.17	0.91	0.04
83.09	101.1	18.01	184.18	H2O	0	0.07	0.83	0.04
84.08	101.1	17.02	185.18	Unkwnown	0	0.67	0.89	0.04
85.07	101.1	16.03	186.16	Unkwnown	0	0.35	0.95	0.04
87.04	101.1	14.05	188.14	CH2	0	0.25	0.92	0.04
87.08	101.1	14.02	188.18	CH2	0	0.49	0.94	0.04
97.04	101.1	4.06	198.14	Isotope-4	0	0.28	0.92	0.05
97.07	101.1	4.03	198.16	Isotope-4	0	0.21	0.9	0.05
98.98	101.1	2.12	200.07	Unkwnown	0	0.89	0.82	0.05
99.08	101.1	2.02	200.18	Isotope-2	0	0.39	0.94	0.05
99.09	101.1	2	200.19	Isotope-2	0	0.28	0.87	0.05
99.1	101.1	1.99	200.2	Isotope-2	0	0.24	0.8	0.05
101.06	101.1	0.04	202.16	Resolution	0	0.33	0.93	0.05
47.01	102.03	55.01	149.04	Unkwnown	0	0	0.8	0.02
31.02	102.07	71.05	133.09	Unkwnown	-0.01	0.01	0.86	0.02
31.03	102.07	71.04	133.1	Unkwnown	-0.01	0.01	0.86	0.02
33.03	102.07	69.04	135.1	Unkwnown	0	0	0.83	0.02
33.05	102.07	69.02	135.11	Unkwnown	0	0	0.83	0.02
41.04	102.07	61.03	143.11	Unkwnown	0	0.01	0.8	0.02
43.02	102.07	59.05	145.09	Unkwnown	0	0	0.81	0.02
44.06	102.07	58.01	146.13	Unkwnown	0	0.36	0.82	0.02
45.03	102.07	57.04	147.1	Unkwnown	0	0	0.88	0.02
47.04	102.07	55.03	149.11	Unkwnown	0	0.04	0.81	0.02
57.03	102.07	45.04	159.1	Unkwnown	0	0.05	0.87	0.03
59.05	102.07	43.02	161.12	Unkwnown	0	0	0.83	0.03
69.03	102.07	33.04	171.1	Unkwnown	0	0.16	0.81	0.03
73.07	102.07	29	175.13	Unkwnown	0	0.02	0.83	0.04
77.06	102.07	25.01	179.13	Unkwnown	0	0.19	0.83	0.04
80.05	102.07	22.02	182.12	Unkwnown	0	0.21	0.85	0.04
83	102.07	19.07	185.07	Unkwnown	0	0.02	0.82	0.04
83.01	102.07	19.06	185.08	Unkwnown	0	0.6	0.88	0.04
83.05	102.07	19.02	185.12	Unkwnown	0	0.07	0.85	0.04
84.08	102.07	17.99	186.15	H2O	0	0.27	0.84	0.04
85.07	102.07	17	187.13	Unkwnown	0	0.14	0.9	0.04
86.04	102.07	16.03	188.1	Unkwnown	0	0.76	0.81	0.04
87.04	102.07	15.02	189.11	Unkwnown	0	0.1	0.86	0.04
87.08	102.07	14.99	189.15	Unkwnown	0	0.2	0.88	0.04
97.04	102.07	5.03	199.11	Unkwnown	0	0.11	0.86	0.05
97.07	102.07	5	199.13	Unkwnown	0	0.09	0.84	0.05
99.08	102.07	2.99	201.15	Isotope-3	0	0.16	0.89	0.05
99.09	102.07	2.98	201.16	Isotope-3	0	0.12	0.82	0.05
101.06	102.07	1.01	203.13	Isotope-1	0	0.13	0.87	0.05
101.1	102.07	0.97	203.16	Isotope-1	0	0.41	0.93	0.05
31.02	103.03	72.01	134.05	Unkwnown	-0.01	0.01	0.88	0.02
31.03	103.03	72	134.06	Unkwnown	-0.01	0.02	0.89	0.02
33.03	103.03	70	136.07	Unkwnown	0	0	0.83	0.02
33.05	103.03	69.99	136.08	Unkwnown	0	0.01	0.83	0.02
41.04	103.03	61.99	144.07	Unkwnown	0	0.01	0.81	0.02
43.02	103.03	60.01	146.05	Unkwnown	0	0.01	0.91	0.02
44.06	103.03	58.97	147.09	Unkwnown	0	0.53	0.81	0.02
45.03	103.03	58	148.07	Unkwnown	0	0.01	0.91	0.02
47.04	103.03	56	150.07	Unkwnown	0	0.05	0.84	0.02
57.03	103.03	46	160.07	Unkwnown	0	0.09	0.94	0.03
59.05	103.03	43.98	162.08	Unkwnown	0	0	0.81	0.03
61.03	103.03	42	164.06	Unkwnown	0	0.01	0.82	0.03
61.07	103.03	41.97	164.1	Unkwnown	0	0.24	0.82	0.03
69.03	103.03	34	172.07	Unkwnown	0	0.25	0.85	0.03
71.05	103.03	31.98	174.08	Unkwnown	0	0.04	0.82	0.04
73.07	103.03	29.97	176.1	Unkwnown	0	0.03	0.81	0.04
83	103.03	20.03	186.03	Unkwnown	0	0.03	0.83	0.04
83.01	103.03	20.02	186.04	Unkwnown	0	0.89	0.89	0.04
83.05	103.03	19.98	186.08	Unkwnown	0	0.1	0.88	0.04
84.08	103.03	18.95	187.11	Unkwnown	0	0.39	0.81	0.04
85.07	103.03	17.97	188.1	H2O	0	0.22	0.93	0.04
86.04	103.03	17	189.07	Unkwnown	0	1.19	0.87	0.04
86.06	103.03	16.97	189.09	Unkwnown	0	0.94	0.84	0.04
87.04	103.03	15.99	190.08	Unkwnown	0	0.16	0.91	0.04
87.08	103.03	15.95	190.11	Unkwnown	0	0.28	0.85	0.04
89.02	103.03	14.01	192.06	CH2	0	0.5	0.82	0.04
97.04	103.03	5.99	200.07	Unkwnown	0	0.17	0.89	0.05
97.07	103.03	5.97	200.1	Unkwnown	0	0.13	0.88	0.05
99.08	103.03	3.95	202.11	Isotope-4	0	0.24	0.91	0.05
99.09	103.03	3.94	202.12	Isotope-4	0	0.17	0.84	0.05
101.06	103.03	1.97	204.09	Isotope-2	0	0.2	0.9	0.05
101.1	103.03	1.94	204.13	Isotope-2	0	0.59	0.92	0.05
102.07	103.03	0.96	205.1	Isotope-1	0	1.3	0.89	0.05
31.02	103.04	72.02	134.06	Unkwnown	-0.01	0.02	0.85	0.02
31.03	103.04	72.01	134.07	Unkwnown	-0.01	0.03	0.86	0.02
33.03	103.04	70.01	136.08	Unkwnown	0	0	0.83	0.02
33.05	103.04	70	136.09	Unkwnown	0	0.01	0.82	0.02
43.02	103.04	60.02	146.06	Unkwnown	0	0.01	0.92	0.02
45.03	103.04	58.01	148.08	Unkwnown	0	0.01	0.9	0.02
47.04	103.04	56.01	150.08	Unkwnown	0	0.07	0.82	0.02
57.03	103.04	46.01	160.08	Unkwnown	0	0.11	0.93	0.03
61.03	103.04	42.01	164.07	Unkwnown	0	0.02	0.85	0.03
61.07	103.04	41.98	164.11	Unkwnown	0	0.31	0.82	0.03
69.03	103.04	34.01	172.08	Unkwnown	0	0.32	0.85	0.03
71.05	103.04	31.99	174.09	Unkwnown	0.01	0.05	0.81	0.04
73.07	103.04	29.98	176.11	Unkwnown	0.01	0.03	0.8	0.04
83	103.04	20.04	186.04	Unkwnown	0	0.04	0.81	0.04
83.01	103.04	20.03	186.05	Unkwnown	0	1.12	0.88	0.04
83.05	103.04	19.99	186.09	Unkwnown	0	0.13	0.88	0.04
85.07	103.04	17.98	188.11	H2O	0	0.27	0.9	0.04
86.04	103.04	17.01	189.08	Unkwnown	0	1.47	0.84	0.04
86.06	103.04	16.98	189.1	Unkwnown	0	1.15	0.81	0.04
87.04	103.04	16	190.09	Unkwnown	0	0.2	0.9	0.04
87.08	103.04	15.96	190.12	Unkwnown	0	0.36	0.84	0.04
89.02	103.04	14.02	192.07	CH2	0	0.69	0.88	0.04
97.04	103.04	6	200.08	Unkwnown	0	0.22	0.88	0.05
97.07	103.04	5.98	200.11	Unkwnown	0	0.17	0.88	0.05
99.08	103.04	3.96	202.12	Isotope-4	0	0.3	0.88	0.05
99.09	103.04	3.95	202.13	Isotope-4	0	0.21	0.8	0.05
101.06	103.04	1.98	204.1	Isotope-2	0	0.25	0.88	0.05
101.1	103.04	1.95	204.14	Isotope-2	0	0.72	0.88	0.05
102.07	103.04	0.97	205.11	Isotope-1	0.01	1.57	0.84	0.05
103.03	103.04	0.01	206.07	Resolution	0	1.25	0.98	0.05
43.02	103.08	60.06	146.09	Unkwnown	0	0.01	0.82	0.02
61.03	103.08	42.05	164.1	Unkwnown	0	0.02	0.81	0.03
89.02	103.08	14.05	192.1	CH2	0	0.91	0.87	0.04
89.04	103.08	14.03	192.12	CH2	0	0.3	0.9	0.04
89.06	103.08	14.02	192.14	CH2	0	0.25	0.88	0.04
103.03	103.08	0.04	206.11	Resolution	0	1.39	0.82	0.05
103.04	103.08	0.03	206.12	Resolution	0	1.22	0.91	0.05
90.06	103.11	13.06	193.17	Unkwnown	0	1.03	0.89	0.05
83.01	104.05	21.04	187.06	Unkwnown	0	0.6	0.81	0.04
83.01	104.05	21.04	187.06	Unkwnown	0	0.61	0.81	0.04
104.05	104.05	0	208.1	Resolution	0	1.02	1	0.05
104.05	104.06	0.02	208.11	Resolution	0	1.01	1	0.05
104.05	104.06	0.01	208.11	Resolution	0	0.99	1	0.05
104.05	105.06	1.01	209.1	Isotope-1	0.06	10.86	0.81	0.05
104.05	105.06	1.01	209.11	Isotope-1	0.06	10.65	0.82	0.05
104.06	105.06	1	209.12	Isotope-1	0.06	10.85	0.83	0.05
105.04	105.06	0.02	210.09	Resolution	-0.05	1.49	0.94	0.05
104.05	105.07	1.02	209.12	Isotope-1	0.03	10.24	0.81	0.05
104.05	105.07	1.02	209.12	Isotope-1	0.03	10.06	0.81	0.05
104.06	105.07	1.01	209.13	Isotope-1	0.03	10.3	0.82	0.05
105.04	105.07	0.03	210.11	Resolution	-0.06	1.32	0.87	0.05
105.06	105.07	0.01	210.13	Resolution	-0.02	0.95	0.98	0.05
53.03	106.08	53.05	159.1	Unkwnown	-0.01	0.23	0.81	0.03
65.02	106.08	41.06	171.1	Unkwnown	-0.01	0.94	0.81	0.03
79.05	106.08	27.02	185.13	Unkwnown	-0.01	0.07	0.86	0.04
80.05	106.08	26.03	186.13	C2H2	0	0.54	0.81	0.04
92.06	106.08	14.02	198.14	CH2	0	0.38	0.83	0.05
105.06	106.08	1.02	211.14	Isotope-1	-0.01	0.16	0.87	0.05
105.07	106.08	1.01	211.15	Isotope-1	0	0.16	0.88	0.05
53.03	107.05	54.02	160.08	Unkwnown	-0.04	1.73	0.85	0.03
65.02	107.05	42.03	172.07	Unkwnown	-0.05	6.88	0.84	0.03
79.05	107.05	28	186.1	C2H4	-0.03	0.48	0.89	0.04
80.05	107.05	27	187.1	Unkwnown	-0.01	3.97	0.84	0.04
92.06	107.05	14.99	199.11	Unkwnown	0.01	2.85	0.87	0.05
106.08	107.05	0.97	213.13	Isotope-1	0.03	6.27	0.89	0.05
79.05	107.09	28.03	186.14	C2H4	-0.11	1.17	0.86	0.04
92.06	107.09	15.02	199.15	Unkwnown	-0.02	6.81	0.82	0.05
106.08	107.09	1.01	213.16	Isotope-1	0.01	15.77	0.88	0.05
107.05	107.09	0.04	214.14	Resolution	-0.05	2.49	0.98	0.05
41.04	108.06	67.02	149.1	Unkwnown	0	0.02	0.87	0.02
44.06	108.06	64	152.12	Unkwnown	-0.01	1.37	0.87	0.02
47.05	108.06	61.01	155.11	Unkwnown	0	0.17	0.84	0.02
47.06	108.06	61	155.12	Unkwnown	0	0.19	0.84	0.02
53.03	108.06	55.03	161.08	Unkwnown	0	0.35	0.92	0.03
54.05	108.06	54.01	162.1	Unkwnown	0.01	1.68	0.84	0.03
57.07	108.06	50.99	165.13	Unkwnown	0	0.05	0.83	0.03
65.02	108.06	43.04	173.08	Unkwnown	0	1.34	0.87	0.03
68.05	108.06	40.01	176.11	Unkwnown	0	0.96	0.81	0.03
69.03	108.06	39.02	177.09	Unkwnown	0	0.57	0.8	0.03
69.07	108.06	38.99	177.13	Unkwnown	0	0.07	0.8	0.03
73.07	108.06	34.99	181.12	Unkwnown	0.01	0.06	0.8	0.04
77.06	108.06	31	185.12	Unkwnown	0	0.68	0.83	0.04
78.05	108.06	30.01	186.1	Unkwnown	0.01	1.38	0.81	0.04
79.05	108.06	29	187.11	Unkwnown	0	0.09	0.89	0.04
80.05	108.06	28.01	188.11	C2H4	0	0.77	0.87	0.04
82.08	108.06	25.98	190.14	C2H2	0	0.54	0.81	0.04
84.08	108.06	23.98	192.14	Unkwnown	0	0.93	0.81	0.04
85.07	108.06	22.99	193.12	Unkwnown	0	0.45	0.81	0.04
91.04	108.06	17.02	199.1	Unkwnown	0.01	0.09	0.83	0.05
91.05	108.06	17.01	199.11	Unkwnown	0.01	0.07	0.81	0.05
91.06	108.06	17	199.12	Unkwnown	0.01	0.07	0.81	0.05
92.06	108.06	16	200.12	Unkwnown	0.01	0.56	0.92	0.05
97.07	108.06	10.99	205.12	Unkwnown	0	0.3	0.84	0.05
99.08	108.06	8.98	207.14	Unkwnown	0	0.54	0.83	0.05
106.08	108.06	1.98	214.14	Isotope-2	0.01	1.1	0.84	0.05
107.05	108.06	1.01	215.11	Isotope-1	0.01	0.17	0.89	0.05
107.09	108.06	0.97	215.14	Isotope-1	0.01	0.06	0.81	0.05
53.03	108.08	55.06	161.11	Unkwnown	-0.01	0.49	0.89	0.03
65.02	108.08	43.06	173.1	Unkwnown	-0.01	1.94	0.87	0.03
79.05	108.08	29.03	187.14	Unkwnown	-0.01	0.13	0.92	0.04
80.05	108.08	28.03	188.13	C2H4	0	1.12	0.87	0.04
92.06	108.08	16.02	200.14	Unkwnown	0	0.81	0.91	0.05
106.08	108.08	2	214.16	Isotope-2	0.01	1.74	0.91	0.05
107.05	108.08	1.03	215.13	Isotope-1	0	0.27	0.98	0.05
107.09	108.08	1	215.17	Isotope-1	0.01	0.1	0.95	0.05
108.06	108.08	0.02	216.14	Resolution	0	1.39	0.95	0.05
53.03	108.09	55.07	161.12	Unkwnown	-0.01	0.46	0.84	0.03
65.02	108.09	43.07	173.11	Unkwnown	-0.01	1.81	0.83	0.03
79.05	108.09	29.04	187.15	Unkwnown	-0.01	0.13	0.89	0.04
80.05	108.09	28.04	188.14	C2H4	0	1.05	0.83	0.04
92.06	108.09	16.03	200.16	Unkwnown	0	0.76	0.88	0.05
106.08	108.09	2.02	214.17	Isotope-2	0	1.69	0.91	0.05
107.05	108.09	1.04	215.14	Isotope-1	0	0.26	0.99	0.05
107.09	108.09	1.01	215.18	Isotope-1	0	0.1	0.98	0.05
108.06	108.09	0.04	216.15	Resolution	-0.01	1.27	0.9	0.05
108.08	108.09	0.01	216.17	Resolution	0	0.96	0.99	0.05
41	109.07	68.06	150.07	Unkwnown	-0.11	9.07	0.85	0.02
41.04	109.07	68.03	150.1	Unkwnown	-0.01	0.12	0.96	0.02
44.06	109.07	65	153.13	Unkwnown	-0.03	6.53	0.9	0.02
53.03	109.07	56.04	162.09	Unkwnown	0	1.46	0.84	0.03
54.05	109.07	55.02	163.11	Unkwnown	0.03	7.75	0.85	0.03
57.07	109.07	52	166.14	Unkwnown	-0.01	0.26	0.97	0.03
68.05	109.07	41.02	177.11	Unkwnown	-0.01	5.29	0.96	0.03
69.07	109.07	40	178.14	Unkwnown	0	0.42	0.97	0.03
71.09	109.07	37.98	180.15	Unkwnown	-0.01	0.55	0.93	0.04
73.07	109.07	36	182.13	Unkwnown	0.04	0.3	0.83	0.04
77.06	109.07	32.01	186.13	Unkwnown	0	3.34	0.88	0.04
78.05	109.07	31.02	187.11	Unkwnown	0.05	6.36	0.8	0.04
82.08	109.07	26.99	191.14	Unkwnown	0.02	2.68	0.87	0.04
83	109.07	26.07	192.07	Unkwnown	-0.02	0.4	0.94	0.04
83.09	109.07	25.98	192.15	C2H2	0	0.54	0.95	0.04
84.08	109.07	24.98	193.15	Unkwnown	0	4.99	0.94	0.04
85.07	109.07	24	194.13	Unkwnown	-0.01	2.22	0.86	0.04
85.1	109.07	23.96	194.17	Unkwnown	0	0.85	0.91	0.04
86.1	109.07	22.97	195.16	Unkwnown	0.02	8.69	0.9	0.04
91.04	109.07	18.03	200.1	H2O	0.03	0.43	0.9	0.05
91.05	109.07	18.02	200.12	H2O	0.03	0.36	0.89	0.05
91.06	109.07	18.01	200.12	H2O	0.03	0.35	0.89	0.05
92.06	109.07	17	201.13	Unkwnown	0.04	2.27	0.81	0.05
93.07	109.07	16	202.14	Unkwnown	0.02	0.08	0.83	0.05
95.05	109.07	14.02	204.11	CH2	0.01	0.23	0.85	0.05
95.09	109.07	13.98	204.15	CH2	0.01	0.34	0.95	0.05
96.06	109.07	13.01	205.12	Unkwnown	-0.01	4.3	0.95	0.05
97.07	109.07	12	206.13	C	0	1.52	0.91	0.05
97.1	109.07	11.96	206.17	C	0.01	0.64	0.94	0.05
99.08	109.07	9.99	208.15	Unkwnown	0	2.64	0.88	0.05
99.09	109.07	9.97	208.16	Unkwnown	-0.01	2.12	0.92	0.05
99.1	109.07	9.96	208.17	Unkwnown	0	1.92	0.91	0.05
99.12	109.07	9.95	208.18	Unkwnown	0	1.96	0.89	0.05
108.06	109.07	1.01	217.12	Isotope-1	0.02	3.92	0.85	0.05
41	109.08	68.07	150.08	Unkwnown	-0.19	15.72	0.83	0.02
41.04	109.08	68.04	150.12	Unkwnown	-0.02	0.21	0.94	0.02
44.06	109.08	65.01	153.14	Unkwnown	-0.05	11.14	0.87	0.02
53.03	109.08	56.05	162.1	Unkwnown	0	2.51	0.81	0.03
54.05	109.08	55.03	163.12	Unkwnown	0.05	13.57	0.84	0.03
57.07	109.08	52.01	166.15	Unkwnown	-0.02	0.46	0.97	0.03
68.05	109.08	41.03	177.13	Unkwnown	-0.01	9.36	0.96	0.03
69.07	109.08	40.01	178.15	Unkwnown	-0.01	0.74	0.97	0.03
71.09	109.08	37.99	180.16	Unkwnown	-0.02	1	0.94	0.04
73.07	109.08	36.01	182.14	Unkwnown	0.06	0.52	0.8	0.04
77.06	109.08	32.02	186.14	Unkwnown	0.01	5.72	0.85	0.04
82.08	109.08	27	191.15	Unkwnown	0.03	4.68	0.86	0.04
83	109.08	26.08	192.08	Unkwnown	-0.04	0.71	0.94	0.04
83.09	109.08	25.99	192.16	C2H2	-0.01	0.96	0.96	0.04
84.08	109.08	25	193.16	Unkwnown	0	8.85	0.94	0.04
85.07	109.08	24.01	194.14	Unkwnown	-0.02	3.79	0.83	0.04
85.1	109.08	23.98	194.18	Unkwnown	-0.01	1.54	0.93	0.04
86.1	109.08	22.98	195.17	Unkwnown	0.03	15.66	0.92	0.04
91.04	109.08	18.04	200.12	H2O	0.06	0.73	0.87	0.05
91.05	109.08	18.03	200.13	H2O	0.06	0.62	0.87	0.05
91.06	109.08	18.02	200.13	H2O	0.06	0.6	0.87	0.05
95.05	109.08	14.03	204.13	CH2	0.01	0.4	0.84	0.05
95.09	109.08	13.99	204.16	CH2	0	0.62	0.96	0.05
96.06	109.08	13.02	205.13	Unkwnown	-0.02	7.57	0.95	0.05
97.07	109.08	12.01	206.14	C	-0.01	2.65	0.9	0.05
97.1	109.08	11.98	206.18	C	0.01	1.16	0.97	0.05
99.08	109.08	10	208.16	Unkwnown	0	4.52	0.86	0.05
99.09	109.08	9.98	208.17	Unkwnown	-0.01	3.72	0.91	0.05
99.1	109.08	9.97	208.18	Unkwnown	-0.01	3.42	0.91	0.05
99.12	109.08	9.96	208.19	Unkwnown	0	3.52	0.9	0.05
108.06	109.08	1.02	217.13	Isotope-1	0.04	6.6	0.81	0.05
109.07	109.08	0.01	218.14	Resolution	0	1.76	0.99	0.05
41	109.09	68.09	150.09	Unkwnown	-0.23	19.23	0.82	0.02
41.04	109.09	68.05	150.13	Unkwnown	-0.03	0.26	0.92	0.02
44.06	109.09	65.03	153.15	Unkwnown	-0.05	13.41	0.85	0.02
54.05	109.09	55.04	163.14	Unkwnown	0.06	16.51	0.83	0.03
57.07	109.09	52.02	166.16	Unkwnown	-0.02	0.56	0.96	0.03
68.05	109.09	41.04	177.14	Unkwnown	-0.02	11.46	0.95	0.03
69.07	109.09	40.02	178.16	Unkwnown	-0.01	0.9	0.97	0.03
71.09	109.09	38	180.18	Unkwnown	-0.03	1.23	0.95	0.04
77.06	109.09	32.03	186.15	Unkwnown	0.01	6.87	0.83	0.04
82.08	109.09	27.01	191.17	Unkwnown	0.03	5.72	0.85	0.04
83	109.09	26.09	192.09	Unkwnown	-0.04	0.87	0.93	0.04
83.09	109.09	26	192.18	C2H2	-0.01	1.18	0.96	0.04
84.08	109.09	25.01	193.17	Unkwnown	0	10.77	0.93	0.04
85.07	109.09	24.02	194.15	Unkwnown	-0.02	4.49	0.8	0.04
85.1	109.09	23.99	194.19	Unkwnown	-0.02	1.91	0.94	0.04
86.1	109.09	22.99	195.19	Unkwnown	0.03	19.43	0.93	0.04
91.04	109.09	18.05	200.13	H2O	0.07	0.87	0.85	0.05
91.05	109.09	18.04	200.14	H2O	0.07	0.75	0.85	0.05
91.06	109.09	18.03	200.15	H2O	0.07	0.72	0.85	0.05
95.05	109.09	14.04	204.14	CH2	0.01	0.49	0.84	0.05
95.09	109.09	14	204.18	CH2	0	0.77	0.97	0.05
96.06	109.09	13.03	205.15	Unkwnown	-0.03	9.29	0.94	0.05
97.07	109.09	12.02	206.15	C	0	3.17	0.87	0.05
97.1	109.09	11.99	206.19	C	0.01	1.44	0.97	0.05
99.08	109.09	10.01	208.17	Unkwnown	0	5.4	0.83	0.05
99.09	109.09	10	208.18	Unkwnown	-0.02	4.51	0.9	0.05
99.1	109.09	9.99	208.19	Unkwnown	-0.01	4.19	0.91	0.05
99.12	109.09	9.97	208.21	Unkwnown	0	4.36	0.9	0.05
109.07	109.09	0.02	218.15	Resolution	0	2.14	0.98	0.05
109.08	109.09	0.01	218.17	Resolution	0	1.23	1	0.05
41	109.1	68.1	150.1	Unkwnown	-0.24	19.69	0.82	0.02
41.04	109.1	68.06	150.14	Unkwnown	-0.03	0.26	0.9	0.02
44.06	109.1	65.04	153.16	Unkwnown	-0.05	13.52	0.83	0.02
54.05	109.1	55.06	163.15	Unkwnown	0.07	16.71	0.81	0.03
57.07	109.1	52.03	166.17	Unkwnown	-0.02	0.57	0.95	0.03
68.05	109.1	41.05	177.15	Unkwnown	-0.02	11.69	0.94	0.03
69.07	109.1	40.03	178.17	Unkwnown	-0.01	0.91	0.95	0.03
71.09	109.1	38.02	180.19	Unkwnown	-0.03	1.28	0.95	0.04
77.06	109.1	32.04	186.16	Unkwnown	0.01	6.88	0.81	0.04
82.08	109.1	27.02	191.18	Unkwnown	0.03	5.85	0.84	0.04
83	109.1	26.1	192.1	Unkwnown	-0.04	0.87	0.9	0.04
83.09	109.1	26.02	192.19	C2H2	-0.01	1.2	0.95	0.04
84.08	109.1	25.02	193.18	Unkwnown	0	10.84	0.91	0.04
85.1	109.1	24	194.2	Unkwnown	-0.03	1.98	0.94	0.04
86.1	109.1	23.01	195.2	Unkwnown	0.03	20.12	0.93	0.04
91.04	109.1	18.06	200.14	H2O	0.07	0.88	0.83	0.05
91.05	109.1	18.05	200.15	H2O	0.08	0.75	0.83	0.05
91.06	109.1	18.04	200.16	H2O	0.08	0.72	0.83	0.05
95.05	109.1	14.05	204.15	CH2	0.01	0.5	0.83	0.05
95.09	109.1	14.02	204.19	CH2	-0.01	0.8	0.97	0.05
96.06	109.1	13.04	205.16	Unkwnown	-0.03	9.54	0.94	0.05
97.07	109.1	12.04	206.17	C	0	3.15	0.84	0.05
97.1	109.1	12	206.2	C	0	1.48	0.97	0.05
99.08	109.1	10.02	208.18	Unkwnown	0	5.36	0.8	0.05
99.09	109.1	10.01	208.19	Unkwnown	-0.02	4.55	0.88	0.05
99.1	109.1	10	208.21	Unkwnown	-0.01	4.27	0.9	0.05
99.12	109.1	9.98	208.22	Unkwnown	-0.01	4.49	0.9	0.05
109.07	109.1	0.04	218.17	Resolution	0	2.18	0.97	0.05
109.08	109.1	0.03	218.18	Resolution	-0.01	1.26	0.99	0.05
109.09	109.1	0.01	218.19	Resolution	0	1.03	1	0.05
31.02	110.06	79.04	141.08	Unkwnown	-0.01	0.01	0.8	0.02
41	110.06	69.06	151.06	Unkwnown	-0.01	0.85	0.89	0.02
41.04	110.06	69.02	151.1	Unkwnown	0	0.01	0.93	0.02
44.06	110.06	66	154.12	Unkwnown	0	0.61	0.94	0.02
53.03	110.06	57.03	163.09	Unkwnown	0	0.13	0.84	0.03
54.05	110.06	56.01	164.11	Unkwnown	0	0.74	0.91	0.03
57.07	110.06	52.99	167.13	Unkwnown	0	0.02	0.91	0.03
65.02	110.06	45.04	175.08	Unkwnown	0	0.51	0.81	0.03
68.05	110.06	42.01	178.11	Unkwnown	0	0.46	0.94	0.03
69.03	110.06	41.03	179.09	Unkwnown	0	0.23	0.81	0.03
69.07	110.06	40.99	179.13	Unkwnown	0	0.04	0.92	0.03
71.09	110.06	38.97	181.15	Unkwnown	0	0.05	0.86	0.04
73.07	110.06	37	183.13	Unkwnown	0	0.03	0.83	0.04
77.06	110.06	33	187.12	Unkwnown	0	0.31	0.91	0.04
78.05	110.06	32.01	188.11	Unkwnown	0	0.59	0.84	0.04
80.05	110.06	30.01	190.11	Unkwnown	0	0.3	0.82	0.04
82.08	110.06	27.98	192.14	C2H4	0	0.24	0.85	0.04
82.99	110.06	27.07	193.05	Unkwnown	0	1.49	0.84	0.04
83	110.06	27.06	193.06	Unkwnown	0	0.03	0.89	0.04
83.09	110.06	26.97	193.15	Unkwnown	0	0.04	0.88	0.04
84.08	110.06	25.98	194.14	C2H2	0	0.43	0.91	0.04
85.07	110.06	25	195.13	Unkwnown	0	0.2	0.85	0.04
85.1	110.06	24.96	195.16	Unkwnown	0	0.07	0.83	0.04
86.1	110.06	23.96	196.16	Unkwnown	0	0.77	0.89	0.04
91.04	110.06	19.02	201.1	Unkwnown	0	0.04	0.88	0.05
91.05	110.06	19.01	201.11	Unkwnown	0	0.03	0.87	0.05
91.06	110.06	19	201.12	Unkwnown	0	0.03	0.87	0.05
92.06	110.06	18	202.12	H2O	0	0.21	0.84	0.05
93.07	110.06	16.99	203.13	Unkwnown	0	0.01	0.85	0.05
95.05	110.06	15.01	205.11	Unkwnown	0	0.02	0.82	0.05
95.09	110.06	14.97	205.15	Unkwnown	0	0.03	0.88	0.05
96.06	110.06	14	206.12	CH2	0	0.37	0.92	0.05
97.07	110.06	13	207.13	Unkwnown	0	0.13	0.89	0.05
97.1	110.06	12.96	207.16	Unkwnown	0	0.05	0.86	0.05
99.08	110.06	10.98	209.14	Unkwnown	0	0.24	0.88	0.05
99.09	110.06	10.97	209.15	Unkwnown	0	0.18	0.88	0.05
99.1	110.06	10.96	209.16	Unkwnown	0	0.16	0.85	0.05
99.12	110.06	10.94	209.18	Unkwnown	0	0.16	0.81	0.05
101.1	110.06	8.96	211.16	Unkwnown	0	0.52	0.82	0.05
102.07	110.06	7.99	212.13	Unkwnown	0	1.18	0.81	0.05
108.06	110.06	2	218.12	Isotope-2	0	0.36	0.88	0.05
109.07	110.06	1	219.13	Isotope-1	0	0.08	0.95	0.05
109.08	110.06	0.98	219.14	Isotope-1	0	0.05	0.93	0.05
109.09	110.06	0.97	219.15	Isotope-1	0	0.04	0.91	0.05
109.1	110.06	0.96	219.16	Isotope-1	0	0.04	0.89	0.05
41	110.07	69.07	151.08	Unkwnown	-0.02	1.46	0.85	0.02
41.04	110.07	69.03	151.11	Unkwnown	0	0.02	0.93	0.02
44.06	110.07	66.01	154.14	Unkwnown	0	1.05	0.9	0.02
53.03	110.07	57.05	163.1	Unkwnown	0	0.23	0.81	0.03
54.05	110.07	56.03	164.12	Unkwnown	0	1.26	0.85	0.03
57.07	110.07	53	167.14	Unkwnown	0	0.04	0.95	0.03
68.05	110.07	42.02	178.12	Unkwnown	0	0.85	0.96	0.03
69.07	110.07	41	179.14	Unkwnown	0	0.07	0.95	0.03
71.09	110.07	38.99	181.16	Unkwnown	0	0.09	0.93	0.04
77.06	110.07	33.01	187.13	Unkwnown	0	0.53	0.87	0.04
81.07	110.07	29	191.14	Unkwnown	0	0.03	0.81	0.04
82.08	110.07	28	192.15	C2H4	0	0.44	0.89	0.04
83	110.07	27.07	193.07	Unkwnown	0	0.06	0.91	0.04
83.09	110.07	26.99	193.16	Unkwnown	0	0.08	0.93	0.04
84.08	110.07	25.99	194.15	C2H2	0	0.79	0.93	0.04
85.07	110.07	25.01	195.14	Unkwnown	0	0.34	0.82	0.04
85.1	110.07	24.97	195.17	Unkwnown	0	0.14	0.91	0.04
86.1	110.07	23.98	196.17	Unkwnown	0	1.43	0.92	0.04
91.04	110.07	19.03	201.11	Unkwnown	0.01	0.07	0.86	0.05
91.05	110.07	19.02	201.12	Unkwnown	0.01	0.06	0.86	0.05
91.06	110.07	19.02	201.13	Unkwnown	0.01	0.05	0.86	0.05
93.07	110.07	17	203.14	Unkwnown	0	0.01	0.8	0.05
95.05	110.07	15.02	205.12	Unkwnown	0	0.04	0.84	0.05
95.09	110.07	14.99	205.16	Unkwnown	0	0.06	0.96	0.05
96.06	110.07	14.02	206.13	CH2	0	0.69	0.95	0.05
97.07	110.07	13.01	207.14	Unkwnown	0	0.24	0.89	0.05
97.1	110.07	12.97	207.17	Unkwnown	0	0.1	0.94	0.05
99.08	110.07	10.99	209.15	Unkwnown	0	0.41	0.86	0.05
99.09	110.07	10.98	209.17	Unkwnown	0	0.33	0.9	0.05
99.1	110.07	10.97	209.18	Unkwnown	0	0.3	0.89	0.05
99.12	110.07	10.96	209.19	Unkwnown	0	0.31	0.88	0.05
108.06	110.07	2.02	218.13	Isotope-2	0	0.62	0.84	0.05
109.07	110.07	1.01	219.14	Isotope-1	0	0.16	0.99	0.05
109.08	110.07	1	219.15	Isotope-1	0	0.09	0.99	0.05
109.09	110.07	0.98	219.16	Isotope-1	0	0.07	0.98	0.05
109.1	110.07	0.97	219.17	Isotope-1	0	0.07	0.98	0.05
110.06	110.07	0.01	220.13	Resolution	0	1.73	0.96	0.06
41	110.08	69.08	151.09	Unkwnown	-0.02	2.07	0.83	0.02
41.04	110.08	69.05	151.12	Unkwnown	0	0.03	0.92	0.02
44.06	110.08	66.02	154.15	Unkwnown	-0.01	1.46	0.87	0.02
54.05	110.08	56.04	164.13	Unkwnown	0.01	1.78	0.84	0.03
57.07	110.08	53.01	167.15	Unkwnown	0	0.06	0.95	0.03
68.05	110.08	42.04	178.13	Unkwnown	0	1.22	0.96	0.03
69.07	110.08	41.01	179.15	Unkwnown	0	0.1	0.96	0.03
71.09	110.08	39	181.17	Unkwnown	0	0.13	0.94	0.04
77.06	110.08	33.02	187.14	Unkwnown	0	0.74	0.85	0.04
81.07	110.08	29.01	191.15	Unkwnown	0.01	0.05	0.8	0.04
82.08	110.08	28.01	192.16	C2H4	0	0.63	0.88	0.04
83	110.08	27.08	193.08	Unkwnown	0	0.09	0.92	0.04
83.09	110.08	27	193.17	Unkwnown	0	0.12	0.94	0.04
84.08	110.08	26	194.17	C2H2	0	1.14	0.93	0.04
85.07	110.08	25.02	195.15	Unkwnown	0	0.48	0.8	0.04
85.1	110.08	24.98	195.19	Unkwnown	0	0.2	0.93	0.04
86.1	110.08	23.99	196.18	Unkwnown	0	2.07	0.93	0.04
91.04	110.08	19.05	201.12	Unkwnown	0.01	0.09	0.85	0.05
91.05	110.08	19.03	201.13	Unkwnown	0.01	0.08	0.85	0.05
91.06	110.08	19.03	201.14	Unkwnown	0.01	0.08	0.85	0.05
95.05	110.08	15.04	205.13	Unkwnown	0	0.05	0.84	0.05
95.09	110.08	15	205.17	Unkwnown	0	0.08	0.97	0.05
96.06	110.08	14.03	206.14	CH2	0	1	0.95	0.05
97.07	110.08	13.02	207.15	Unkwnown	0	0.34	0.88	0.05
97.1	110.08	12.98	207.19	Unkwnown	0	0.15	0.95	0.05
99.08	110.08	11	209.16	Unkwnown	0	0.58	0.84	0.05
99.09	110.08	10.99	209.18	Unkwnown	0	0.48	0.9	0.05
99.1	110.08	10.98	209.19	Unkwnown	0	0.44	0.9	0.05
99.12	110.08	10.97	209.2	Unkwnown	0	0.46	0.89	0.05
108.06	110.08	2.03	218.14	Isotope-2	0.01	0.86	0.8	0.05
109.07	110.08	1.02	219.15	Isotope-1	0	0.23	0.98	0.05
109.08	110.08	1.01	219.16	Isotope-1	0	0.13	0.99	0.05
109.09	110.08	1	219.17	Isotope-1	0	0.11	0.99	0.05
109.1	110.08	0.98	219.19	Isotope-1	0	0.1	0.99	0.05
110.06	110.08	0.02	220.14	Resolution	0.01	2.43	0.93	0.06
110.07	110.08	0.01	220.16	Resolution	0	1.43	0.99	0.06
41	110.11	69.11	151.11	Unkwnown	-0.03	2.34	0.82	0.02
41.04	110.11	69.07	151.15	Unkwnown	0	0.03	0.88	0.02
44.06	110.11	66.05	154.17	Unkwnown	-0.01	1.6	0.83	0.02
54.05	110.11	56.06	164.16	Unkwnown	0.01	1.96	0.8	0.03
57.07	110.11	53.04	167.18	Unkwnown	0	0.07	0.93	0.03
68.05	110.11	42.06	178.16	Unkwnown	0	1.37	0.93	0.03
69.07	110.11	41.04	179.18	Unkwnown	0	0.11	0.93	0.03
71.09	110.11	39.02	181.2	Unkwnown	0	0.15	0.94	0.04
77.06	110.11	33.05	187.17	Unkwnown	0	0.8	0.8	0.04
82.08	110.11	28.03	192.19	C2H4	0	0.71	0.87	0.04
83	110.11	27.11	193.11	Unkwnown	0	0.1	0.87	0.04
83.09	110.11	27.02	193.2	Unkwnown	0	0.14	0.92	0.04
84.08	110.11	26.03	194.19	C2H2	0	1.24	0.88	0.04
85.1	110.11	25.01	195.21	Unkwnown	0	0.23	0.93	0.04
86.1	110.11	24.01	196.21	Unkwnown	0	2.38	0.93	0.04
91.04	110.11	19.07	201.15	Unkwnown	0.01	0.1	0.8	0.05
91.05	110.11	19.06	201.16	Unkwnown	0.01	0.09	0.81	0.05
91.06	110.11	19.05	201.17	Unkwnown	0.01	0.08	0.81	0.05
95.05	110.11	15.06	205.16	Unkwnown	0	0.06	0.83	0.05
95.09	110.11	15.02	205.2	Unkwnown	0	0.1	0.99	0.05
96.06	110.11	14.05	206.17	CH2	0	1.13	0.94	0.05
97.07	110.11	13.04	207.17	Unkwnown	0	0.36	0.81	0.05
97.1	110.11	13.01	207.21	Unkwnown	0	0.17	0.94	0.05
99.09	110.11	11.02	209.2	Unkwnown	0	0.53	0.86	0.05
99.1	110.11	11.01	209.21	Unkwnown	0	0.49	0.88	0.05
99.12	110.11	10.99	209.23	Unkwnown	0	0.52	0.89	0.05
109.07	110.11	1.04	219.17	Isotope-1	0	0.25	0.96	0.05
109.08	110.11	1.03	219.19	Isotope-1	0	0.15	0.98	0.05
109.09	110.11	1.02	219.2	Isotope-1	0	0.12	0.99	0.05
109.1	110.11	1.01	219.21	Isotope-1	0	0.12	0.99	0.05
110.06	110.11	0.05	220.17	Resolution	0.01	2.66	0.89	0.06
110.07	110.11	0.04	220.18	Resolution	0	1.61	0.98	0.06
110.08	110.11	0.02	220.19	Resolution	0	1.13	0.99	0.06
77.06	111.08	34.02	188.14	Unkwnown	-0.05	7.52	0.88	0.04
93.03	111.08	18.05	204.11	H2O	-0.03	0.07	0.87	0.05
93.07	111.08	18.01	204.15	H2O	-0.03	0.2	0.88	0.05
94.04	111.08	17.04	205.12	Unkwnown	-0.04	0.94	0.9	0.05
95.05	111.08	16.03	206.13	Unkwnown	-0.05	0.52	0.85	0.05
33.05	111.09	78.05	144.14	Unkwnown	-0.02	0.08	0.82	0.02
41	111.09	70.09	152.09	Unkwnown	-0.14	11.82	0.8	0.02
41.04	111.09	70.05	152.13	Unkwnown	-0.02	0.16	0.88	0.02
44.06	111.09	67.03	155.15	Unkwnown	-0.05	8.83	0.88	0.02
57.07	111.09	54.02	168.16	Unkwnown	-0.01	0.32	0.88	0.03
68.05	111.09	43.04	179.14	Unkwnown	-0.01	6.85	0.9	0.03
69.07	111.09	42.02	180.16	Unkwnown	0	0.53	0.89	0.03
71.09	111.09	40.01	182.18	Unkwnown	-0.01	0.7	0.86	0.04
77.06	111.09	34.03	188.15	Unkwnown	-0.01	4.98	0.95	0.04
83	111.09	28.09	194.09	Unkwnown	-0.02	0.5	0.85	0.04
83.09	111.09	28.01	194.18	C2H4	0	0.66	0.85	0.04
84.08	111.09	27.01	195.17	Unkwnown	0	6.44	0.88	0.04
85.07	111.09	26.03	196.16	C2H2	-0.02	3.02	0.85	0.04
85.1	111.09	25.99	196.19	C2H2	0	1.06	0.83	0.04
86.1	111.09	25	197.19	Unkwnown	0.02	11.2	0.85	0.04
91.04	111.09	20.05	202.13	Unkwnown	0.04	0.59	0.89	0.05
91.05	111.09	20.04	202.14	Unkwnown	0.04	0.5	0.9	0.05
91.06	111.09	20.03	202.15	Unkwnown	0.04	0.49	0.9	0.05
93.03	111.09	18.06	204.13	H2O	0.01	0.04	0.9	0.05
93.07	111.09	18.02	204.16	H2O	0.01	0.13	0.91	0.05
94.04	111.09	17.05	205.13	Unkwnown	0	0.59	0.92	0.05
95.05	111.09	16.04	206.14	Unkwnown	-0.01	0.35	0.93	0.05
96.06	111.09	15.04	207.15	Unkwnown	-0.02	5.78	0.93	0.05
97.07	111.09	14.03	208.16	CH2	0	1.87	0.82	0.05
97.1	111.09	13.99	208.19	CH2	0.02	0.79	0.84	0.05
99.08	111.09	12.01	210.17	C	-0.01	3.64	0.88	0.05
99.09	111.09	12	210.18	C	-0.01	2.8	0.88	0.05
99.1	111.09	11.99	210.2	C	0	2.48	0.85	0.05
99.12	111.09	11.98	210.21	C	0.01	2.49	0.82	0.05
101.1	111.09	10	212.19	Unkwnown	0.02	8.1	0.82	0.05
102.07	111.09	9.02	213.16	Unkwnown	0.07	18.45	0.81	0.05
109.07	111.09	2.03	220.16	Isotope-2	0.01	1.23	0.89	0.05
109.08	111.09	2.02	220.17	Isotope-2	0.01	0.67	0.87	0.05
109.09	111.09	2	220.18	Isotope-2	0.01	0.54	0.85	0.05
109.1	111.09	1.99	220.19	Isotope-2	0.02	0.5	0.83	0.05
110.06	111.09	1.03	221.15	Isotope-1	0.03	13.78	0.89	0.06
110.07	111.09	1.02	221.17	Isotope-1	0.01	7.55	0.88	0.06
110.08	111.09	1.01	221.18	Isotope-1	0.01	5.12	0.87	0.06
110.11	111.09	0.98	221.2	Isotope-1	0.02	4.24	0.83	0.06
111.08	111.09	0.01	222.17	Resolution	0.04	0.55	0.93	0.06
41	111.1	70.1	152.11	Unkwnown	-0.12	10.14	0.82	0.02
41.04	111.1	70.07	152.14	Unkwnown	-0.01	0.14	0.93	0.02
44.06	111.1	67.04	155.17	Unkwnown	-0.03	7.31	0.87	0.02
57.07	111.1	54.03	168.17	Unkwnown	-0.01	0.3	0.97	0.03
68.05	111.1	43.06	179.15	Unkwnown	-0.01	6.1	0.96	0.03
69.07	111.1	42.03	180.17	Unkwnown	0	0.48	0.98	0.03
71.09	111.1	40.02	182.19	Unkwnown	-0.01	0.66	0.96	0.04
73.07	111.1	38.04	184.17	Unkwnown	0.04	0.34	0.82	0.04
75.04	111.1	36.06	186.15	Unkwnown	0.02	0.06	0.8	0.04
77.06	111.1	34.04	188.16	Unkwnown	0	3.93	0.9	0.04
83	111.1	28.1	194.1	Unkwnown	-0.02	0.47	0.94	0.04
83.09	111.1	28.02	194.19	C2H4	0	0.63	0.97	0.04
84.08	111.1	27.02	195.19	Unkwnown	0	5.86	0.96	0.04
85.07	111.1	26.04	196.17	C2H2	-0.01	2.58	0.86	0.04
85.1	111.1	26	196.21	C2H2	-0.01	1.02	0.95	0.04
86.1	111.1	25.01	197.2	Unkwnown	0.02	10.43	0.94	0.04
91.04	111.1	20.07	202.14	Unkwnown	0.04	0.49	0.89	0.05
91.05	111.1	20.05	202.15	Unkwnown	0.04	0.42	0.89	0.05
91.06	111.1	20.05	202.16	Unkwnown	0.04	0.4	0.89	0.05
93.03	111.1	18.07	204.14	Unkwnown	0.03	0.03	0.84	0.05
93.07	111.1	18.03	204.17	H2O	0.03	0.09	0.84	0.05
94.04	111.1	17.06	205.15	Unkwnown	0.02	0.45	0.85	0.05
95.05	111.1	16.06	206.15	Unkwnown	0	0.28	0.9	0.05
95.09	111.1	16.02	206.19	Unkwnown	0.01	0.38	0.91	0.05
96.06	111.1	15.05	207.16	Unkwnown	-0.01	4.99	0.96	0.05
97.07	111.1	14.04	208.17	CH2	0	1.71	0.89	0.05
97.1	111.1	14	208.21	CH2	0.01	0.77	0.97	0.05
99.08	111.1	12.02	210.18	C	0	3.07	0.89	0.05
99.09	111.1	12.01	210.2	C	-0.01	2.52	0.94	0.05
99.1	111.1	12	210.21	C	-0.01	2.32	0.95	0.05
99.12	111.1	11.99	210.22	C	0	2.38	0.93	0.05
101.1	111.1	10.01	212.2	Unkwnown	0.03	6.64	0.81	0.05
109.07	111.1	2.04	220.17	Isotope-2	0.01	1.11	0.96	0.05
109.08	111.1	2.03	220.18	Isotope-2	0.01	0.63	0.97	0.05
109.09	111.1	2.02	220.19	Isotope-2	0.01	0.51	0.96	0.05
109.1	111.1	2	220.21	Isotope-2	0.01	0.49	0.95	0.05
110.06	111.1	1.04	221.16	Isotope-1	0.03	11.77	0.91	0.06
110.07	111.1	1.03	221.18	Isotope-1	0.01	6.84	0.95	0.06
110.08	111.1	1.02	221.19	Isotope-1	0.01	4.75	0.96	0.06
110.11	111.1	1	221.21	Isotope-1	0.02	4.05	0.94	0.06
111.09	111.1	0.01	222.2	Resolution	0.02	0.77	0.94	0.06
41.04	111.12	70.08	152.16	Unkwnown	-0.01	0.12	0.9	0.02
44.06	111.12	67.06	155.18	Unkwnown	-0.02	6.33	0.82	0.02
57.07	111.12	54.05	168.19	Unkwnown	-0.01	0.28	0.97	0.03
68.05	111.12	43.07	179.17	Unkwnown	-0.01	5.53	0.94	0.03
69.07	111.12	42.05	180.19	Unkwnown	0	0.44	0.97	0.03
71.09	111.12	40.03	182.2	Unkwnown	-0.02	0.62	0.97	0.04
75.04	111.12	36.07	186.16	Unkwnown	0.01	0.05	0.83	0.04
77.06	111.12	34.06	188.18	Unkwnown	0.01	3.31	0.82	0.04
83	111.12	28.12	194.12	Unkwnown	-0.02	0.43	0.94	0.04
83.09	111.12	28.03	194.2	C2H4	0	0.59	0.98	0.04
84.08	111.12	27.04	195.2	Unkwnown	0	5.33	0.94	0.04
85.07	111.12	26.05	196.18	C2H2	-0.01	2.24	0.81	0.04
85.1	111.12	26.02	196.22	C2H2	-0.01	0.97	0.97	0.04
86.1	111.12	25.02	197.21	Unkwnown	0.01	9.73	0.94	0.04
91.04	111.12	20.08	202.16	Unkwnown	0.04	0.42	0.84	0.05
91.05	111.12	20.07	202.17	Unkwnown	0.04	0.36	0.84	0.05
91.06	111.12	20.06	202.18	Unkwnown	0.04	0.35	0.84	0.05
95.05	111.12	16.07	206.17	Unkwnown	0.01	0.24	0.85	0.05
95.09	111.12	16.03	206.2	Unkwnown	0.01	0.36	0.93	0.05
96.06	111.12	15.06	207.17	Unkwnown	-0.01	4.47	0.93	0.05
97.07	111.12	14.05	208.18	CH2	0	1.54	0.87	0.05
97.1	111.12	14.02	208.22	CH2	0	0.73	1	0.05
99.08	111.12	12.04	210.2	C	0	2.65	0.83	0.05
99.09	111.12	12.03	210.21	C	-0.01	2.28	0.92	0.05
99.1	111.12	12.01	210.22	C	-0.01	2.14	0.95	0.05
99.12	111.12	12	210.23	C	0	2.24	0.95	0.05
109.07	111.12	2.05	220.18	Isotope-2	0	1.01	0.95	0.05
109.08	111.12	2.04	220.19	Isotope-2	0	0.58	0.97	0.05
109.09	111.12	2.03	220.21	Isotope-2	0	0.48	0.97	0.05
109.1	111.12	2.02	220.22	Isotope-2	0.01	0.46	0.97	0.05
110.06	111.12	1.06	221.18	Isotope-1	0.03	10.37	0.87	0.06
110.07	111.12	1.04	221.19	Isotope-1	0	6.25	0.94	0.06
110.08	111.12	1.03	221.2	Isotope-1	0	4.41	0.96	0.06
110.11	111.12	1.01	221.23	Isotope-1	0.01	3.83	0.95	0.06
111.09	111.12	0.03	222.21	Resolution	0.02	0.64	0.86	0.06
111.1	111.12	0.01	222.22	Resolution	0	0.91	0.98	0.06
77.06	112.01	34.95	189.07	Unkwnown	-0.01	0.39	0.85	0.04
93.03	112.01	18.97	205.04	Unkwnown	0	0	0.83	0.05
93.07	112.01	18.94	205.08	Unkwnown	0	0.01	0.85	0.05
94.04	112.01	17.97	206.05	H2O	0	0.05	0.86	0.05
95.05	112.01	16.96	207.06	Unkwnown	-0.01	0.03	0.81	0.05
111.08	112.01	0.93	223.09	Isotope-1	0	0.05	0.98	0.06
111.09	112.01	0.92	223.1	Unkwnown	0	0.08	0.89	0.06
94.04	112.05	18.01	206.09	H2O	-0.01	0.15	0.81	0.05
111.08	112.05	0.97	223.13	Isotope-1	0	0.17	0.98	0.06
111.09	112.05	0.96	223.14	Isotope-1	-0.01	0.25	0.85	0.06
112.01	112.05	0.05	224.06	Resolution	0.01	3.28	0.97	0.06
33.03	112.09	79.06	145.12	Unkwnown	0	0.01	0.8	0.02
33.05	112.09	79.04	145.13	Unkwnown	0	0.01	0.83	0.02
41.04	112.09	71.05	153.13	Unkwnown	0	0.02	0.84	0.02
44.06	112.09	68.03	156.15	Unkwnown	0	0.98	0.87	0.02
57.07	112.09	55.02	169.16	Unkwnown	0	0.03	0.82	0.03
68.05	112.09	44.04	180.14	Unkwnown	0	0.75	0.87	0.03
69.07	112.09	43.02	181.16	Unkwnown	0	0.06	0.84	0.03
77.06	112.09	35.03	189.15	Unkwnown	0	0.55	0.93	0.04
83	112.09	29.09	195.09	Unkwnown	0	0.05	0.81	0.04
83.09	112.09	29	195.17	Unkwnown	0	0.07	0.8	0.04
84.08	112.09	28.01	196.17	C2H4	0	0.7	0.85	0.04
85.07	112.09	27.02	197.15	Unkwnown	0	0.34	0.84	0.04
86.1	112.09	25.99	198.18	C2H2	0	1.21	0.81	0.04
91.04	112.09	21.05	203.13	Unkwnown	0	0.06	0.86	0.05
91.05	112.09	21.04	203.14	Unkwnown	0	0.05	0.86	0.05
91.06	112.09	21.03	203.15	Unkwnown	0	0.05	0.86	0.05
93.03	112.09	19.06	205.12	Unkwnown	0	0	0.87	0.05
93.07	112.09	19.02	205.16	Unkwnown	0	0.01	0.88	0.05
94.04	112.09	18.05	206.13	H2O	0	0.07	0.9	0.05
95.05	112.09	17.04	207.14	Unkwnown	0	0.04	0.89	0.05
96.06	112.09	16.03	208.15	Unkwnown	0	0.62	0.89	0.05
99.08	112.09	13.01	211.17	Unkwnown	0	0.41	0.87	0.05
99.09	112.09	13	211.18	Unkwnown	0	0.3	0.85	0.05
99.1	112.09	12.98	211.19	Unkwnown	0	0.26	0.8	0.05
101.1	112.09	10.99	213.18	Unkwnown	0	0.92	0.83	0.05
102.07	112.09	10.02	214.16	Unkwnown	0.01	2.12	0.83	0.05
109.07	112.09	3.02	221.15	Isotope-3	0	0.13	0.85	0.05
109.08	112.09	3.01	221.16	Isotope-3	0	0.07	0.82	0.05
110.06	112.09	2.03	222.15	Isotope-2	0	1.52	0.87	0.06
110.07	112.09	2.02	222.16	Isotope-2	0	0.82	0.84	0.06
110.08	112.09	2	222.17	Isotope-2	0	0.55	0.82	0.06
111.08	112.09	1.01	223.17	Isotope-1	0	0.06	0.95	0.06
111.09	112.09	1	223.18	Isotope-1	0	0.11	0.99	0.06
111.1	112.09	0.98	223.19	Isotope-1	0	0.12	0.9	0.06
112.01	112.09	0.08	224.1	Resolution	0.01	1.19	0.92	0.06
112.05	112.09	0.04	224.14	Resolution	0.01	0.34	0.9	0.06
41	112.11	71.11	153.11	Unkwnown	-0.02	1.28	0.82	0.02
41.04	112.11	71.07	153.15	Unkwnown	0	0.02	0.91	0.02
44.06	112.11	68.05	156.17	Unkwnown	0	0.91	0.87	0.02
54.05	112.11	58.07	166.16	Unkwnown	0	1.09	0.82	0.03
57.07	112.11	55.04	169.18	Unkwnown	0	0.04	0.96	0.03
68.05	112.11	44.06	180.16	Unkwnown	0	0.77	0.96	0.03
69.07	112.11	43.04	181.18	Unkwnown	0	0.06	0.96	0.03
71.09	112.11	41.03	183.2	Unkwnown	0	0.08	0.97	0.04
75.04	112.11	37.07	187.16	Unkwnown	0	0.01	0.82	0.04
77.06	112.11	35.05	189.17	Unkwnown	0	0.47	0.86	0.04
83	112.11	29.11	195.11	Unkwnown	0	0.06	0.94	0.04
83.09	112.11	29.03	195.2	Unkwnown	0	0.08	0.97	0.04
84.08	112.11	28.03	196.19	C2H4	0	0.73	0.95	0.04
85.07	112.11	27.05	197.18	Unkwnown	0	0.31	0.83	0.04
85.1	112.11	27.01	197.21	Unkwnown	0	0.13	0.96	0.04
86.1	112.11	26.02	198.21	C2H2	0	1.34	0.96	0.04
91.04	112.11	21.07	203.15	Unkwnown	0	0.06	0.85	0.05
91.05	112.11	21.06	203.16	Unkwnown	0	0.05	0.85	0.05
91.06	112.11	21.05	203.17	Unkwnown	0	0.05	0.85	0.05
95.05	112.11	17.06	207.16	Unkwnown	0	0.03	0.87	0.05
95.09	112.11	17.03	207.2	Unkwnown	0	0.05	0.92	0.05
96.06	112.11	16.06	208.17	Unkwnown	0	0.62	0.95	0.05
97.07	112.11	15.05	209.18	Unkwnown	0	0.21	0.87	0.05
97.1	112.11	15.01	209.21	Unkwnown	0	0.1	0.98	0.05
99.08	112.11	13.03	211.19	Unkwnown	0	0.37	0.86	0.05
99.09	112.11	13.02	211.2	Unkwnown	0	0.31	0.93	0.05
99.1	112.11	13.01	211.22	Unkwnown	0	0.29	0.94	0.05
99.12	112.11	13	211.23	Unkwnown	0	0.3	0.93	0.05
109.07	112.11	3.05	221.18	Isotope-3	0	0.14	0.95	0.05
109.08	112.11	3.04	221.19	Isotope-3	0	0.08	0.97	0.05
109.09	112.11	3.02	221.2	Isotope-3	0	0.06	0.97	0.05
109.1	112.11	3.01	221.21	Isotope-3	0	0.06	0.97	0.05
110.06	112.11	2.05	222.17	Isotope-2	0	1.47	0.9	0.06
110.07	112.11	2.04	222.19	Isotope-2	0	0.86	0.96	0.06
110.08	112.11	2.03	222.2	Isotope-2	0	0.6	0.97	0.06
110.11	112.11	2	222.22	Isotope-2	0	0.52	0.96	0.06
111.09	112.11	1.02	223.2	Isotope-1	0	0.09	0.9	0.06
111.1	112.11	1.01	223.22	Isotope-1	0	0.12	0.99	0.06
111.12	112.11	0.99	223.23	Isotope-1	0	0.13	0.99	0.06
112.09	112.11	0.02	224.2	Resolution	0	0.79	0.86	0.06
77.06	113.02	35.96	190.08	Unkwnown	-0.05	5.66	0.82	0.04
93.03	113.02	19.98	206.05	Unkwnown	-0.03	0.05	0.82	0.05
93.07	113.02	19.95	206.09	Unkwnown	-0.03	0.15	0.82	0.05
94.04	113.02	18.97	207.06	Unkwnown	-0.04	0.73	0.85	0.05
111.08	113.02	1.94	224.1	Isotope-2	-0.01	0.79	0.99	0.06
111.09	113.02	1.92	224.11	Isotope-2	-0.03	1.17	0.87	0.06
112.01	113.02	1.01	225.02	Isotope-1	0.03	15.05	0.97	0.06
112.05	113.02	0.96	225.07	Isotope-1	0	4.58	0.99	0.06
112.09	113.02	0.93	225.1	Isotope-1	-0.04	10.75	0.9	0.06
77.06	113.06	36	190.12	Unkwnown	-0.02	3.42	0.84	0.04
93.03	113.06	20.03	206.09	Unkwnown	-0.01	0.03	0.81	0.05
93.07	113.06	19.99	206.13	Unkwnown	-0.01	0.09	0.83	0.05
94.04	113.06	19.02	207.1	Unkwnown	-0.01	0.43	0.85	0.05
111.08	113.06	1.98	224.14	Isotope-2	0	0.46	0.99	0.06
111.09	113.06	1.97	224.15	Isotope-2	-0.01	0.69	0.89	0.06
112.01	113.06	1.05	225.07	Isotope-1	0.03	8.76	0.97	0.06
112.05	113.06	1.01	225.11	Isotope-1	0.01	2.65	0.99	0.06
112.09	113.06	0.97	225.15	Isotope-1	-0.02	6.38	0.92	0.06
113.02	113.06	0.05	226.08	Resolution	0.01	0.58	1	0.06
31.02	113.1	82.08	144.11	Unkwnown	-0.02	0.04	0.85	0.02
31.03	113.1	82.07	144.13	Unkwnown	-0.01	0.06	0.86	0.02
33.03	113.1	80.06	146.13	Unkwnown	0	0.01	0.8	0.02
33.05	113.1	80.05	146.14	Unkwnown	0	0.01	0.82	0.02
41.04	113.1	72.06	154.14	Unkwnown	0	0.03	0.91	0.02
43.02	113.1	70.08	156.11	Unkwnown	0.01	0.01	0.8	0.02
44.06	113.1	69.03	157.16	Unkwnown	0	1.63	0.88	0.02
45.03	113.1	68.06	158.13	Unkwnown	0.01	0.02	0.85	0.02
47.04	113.1	66.06	160.13	Unkwnown	0	0.15	0.82	0.02
57.03	113.1	56.06	170.13	Unkwnown	0.01	0.23	0.88	0.03
57.07	113.1	56.03	170.17	Unkwnown	0	0.06	0.89	0.03
68.05	113.1	45.05	181.15	Unkwnown	0	1.23	0.87	0.03
69.03	113.1	44.06	182.13	Unkwnown	0	0.68	0.81	0.03
69.07	113.1	44.03	182.17	Unkwnown	0	0.1	0.9	0.03
71.09	113.1	42.01	184.18	Unkwnown	0	0.13	0.87	0.04
73.07	113.1	40.03	186.16	Unkwnown	0.01	0.08	0.82	0.04
77.06	113.1	36.04	190.16	Unkwnown	0	0.86	0.88	0.04
83	113.1	30.1	196.1	Unkwnown	0	0.1	0.91	0.04
83.05	113.1	30.05	196.15	Unkwnown	0.01	0.28	0.82	0.04
83.09	113.1	30.01	196.18	Unkwnown	0	0.13	0.89	0.04
84.08	113.1	29.02	197.18	Unkwnown	0	1.25	0.92	0.04
85.07	113.1	28.03	198.16	C2H4	0	0.64	0.97	0.04
85.1	113.1	28	198.2	C2H4	0	0.21	0.86	0.04
86.1	113.1	27	199.19	Unkwnown	0.01	2.14	0.86	0.04
87.04	113.1	26.05	200.14	C2H2	0.01	0.39	0.81	0.04
91.04	113.1	22.06	204.14	Unkwnown	0.01	0.1	0.82	0.05
91.05	113.1	22.05	204.15	Unkwnown	0.01	0.08	0.81	0.05
91.06	113.1	22.04	204.15	Unkwnown	0.01	0.08	0.81	0.05
95.05	113.1	18.05	208.15	H2O	0.01	0.06	0.8	0.05
96.06	113.1	17.04	209.15	Unkwnown	0	1	0.86	0.05
97.04	113.1	16.06	210.14	Unkwnown	0	0.47	0.84	0.05
97.07	113.1	16.03	210.16	Unkwnown	0	0.39	0.91	0.05
97.1	113.1	16	210.2	Unkwnown	0.01	0.15	0.86	0.05
99.08	113.1	14.02	212.18	CH2	0	0.75	0.98	0.05
99.09	113.1	14	212.19	CH2	0	0.58	0.98	0.05
99.1	113.1	13.99	212.2	CH2	0	0.52	0.94	0.05
99.12	113.1	13.98	212.21	CH2	0	0.51	0.89	0.05
101.1	113.1	12	214.19	C	0.01	1.64	0.9	0.05
102.07	113.1	11.03	215.16	Unkwnown	0.02	3.61	0.86	0.05
103.03	113.1	10.06	216.13	Unkwnown	0.01	2.52	0.88	0.05
103.04	113.1	10.05	216.14	Unkwnown	0.01	1.88	0.84	0.05
109.07	113.1	4.03	222.16	Isotope-4	0.01	0.23	0.88	0.05
109.08	113.1	4.02	222.17	Isotope-4	0.01	0.12	0.86	0.05
109.09	113.1	4.01	222.19	Isotope-4	0.01	0.1	0.84	0.05
109.1	113.1	4	222.2	Isotope-4	0.01	0.09	0.81	0.05
110.06	113.1	3.04	223.16	Isotope-3	0.01	2.48	0.86	0.06
110.07	113.1	3.02	223.17	Isotope-3	0.01	1.37	0.86	0.06
110.08	113.1	3.01	223.18	Isotope-3	0.01	0.93	0.84	0.06
111.09	113.1	2	224.19	Isotope-2	0.01	0.16	0.9	0.06
111.1	113.1	1.99	224.2	Isotope-2	0.01	0.2	0.91	0.06
111.12	113.1	1.98	224.21	Isotope-2	0.01	0.21	0.86	0.06
112.09	113.1	1.01	225.18	Isotope-1	0.01	1.46	0.89	0.06
112.11	113.1	0.98	225.21	Isotope-1	0.01	1.56	0.88	0.06
41.04	113.11	72.07	154.15	Unkwnown	0	0.04	0.89	0.02
44.06	113.11	69.05	157.17	Unkwnown	0	1.87	0.83	0.02
57.03	113.11	56.07	170.14	Unkwnown	0.01	0.25	0.8	0.03
57.07	113.11	56.04	170.18	Unkwnown	0	0.08	0.92	0.03
68.05	113.11	45.06	181.16	Unkwnown	0.01	1.48	0.87	0.03
69.07	113.11	44.04	182.18	Unkwnown	0.01	0.12	0.91	0.03
71.09	113.11	42.02	184.19	Unkwnown	0	0.17	0.93	0.04
77.06	113.11	36.05	190.17	Unkwnown	0.01	0.96	0.82	0.04
83	113.11	30.11	196.11	Unkwnown	0	0.12	0.92	0.04
83.09	113.11	30.02	196.19	Unkwnown	0.01	0.16	0.92	0.04
84.08	113.11	29.03	197.19	Unkwnown	0	1.51	0.92	0.04
85.07	113.11	28.04	198.17	C2H4	0	0.74	0.91	0.04
85.1	113.11	28.01	198.21	C2H4	0	0.27	0.93	0.04
86.1	113.11	27.01	199.2	Unkwnown	0.01	2.72	0.91	0.04
95.09	113.11	18.02	208.19	H2O	0.01	0.09	0.81	0.05
96.06	113.11	17.05	209.16	Unkwnown	0	1.2	0.85	0.05
97.07	113.11	16.04	210.17	Unkwnown	0	0.46	0.89	0.05
97.1	113.11	16.01	210.21	Unkwnown	0.01	0.19	0.91	0.05
99.08	113.11	14.03	212.19	CH2	0	0.87	0.93	0.05
99.09	113.11	14.02	212.2	CH2	0	0.72	0.99	0.05
99.1	113.11	14	212.21	CH2	0	0.66	0.99	0.05
99.12	113.11	13.99	212.22	CH2	0	0.67	0.97	0.05
101.1	113.11	12.01	214.2	C	0.01	1.81	0.82	0.05
109.07	113.11	4.04	222.17	Isotope-4	0.01	0.27	0.88	0.05
109.08	113.11	4.03	222.18	Isotope-4	0.01	0.15	0.88	0.05
109.09	113.11	4.02	222.2	Isotope-4	0.01	0.12	0.87	0.05
109.1	113.11	4.01	222.21	Isotope-4	0.01	0.12	0.85	0.05
110.06	113.11	3.05	223.17	Isotope-3	0.01	2.89	0.83	0.06
110.07	113.11	3.03	223.18	Isotope-3	0.01	1.67	0.87	0.06
110.08	113.11	3.02	223.19	Isotope-3	0.01	1.16	0.86	0.06
110.11	113.11	3	223.22	Isotope-3	0.01	0.97	0.83	0.06
111.09	113.11	2.02	224.2	Isotope-2	0.01	0.19	0.85	0.06
111.1	113.11	2	224.21	Isotope-2	0.01	0.25	0.92	0.06
111.12	113.11	1.99	224.22	Isotope-2	0.01	0.26	0.91	0.06
112.09	113.11	1.02	225.2	Isotope-1	0.01	1.62	0.81	0.06
112.11	113.11	1	225.22	Isotope-1	0.01	1.95	0.91	0.06
113.1	113.11	0.01	226.2	Resolution	0	1.18	0.97	0.06
114.09	114.13	0.04	228.22	Resolution	0	0.34	0.93	0.06
31.02	115.08	84.06	146.09	Unkwnown	-0.02	0.03	0.83	0.02
31.03	115.08	84.05	146.1	Unkwnown	-0.01	0.04	0.85	0.02
33.03	115.08	82.04	148.11	Unkwnown	0	0.01	0.83	0.02
33.05	115.08	82.03	148.12	Unkwnown	0	0.01	0.81	0.02
43.02	115.08	72.06	158.09	Unkwnown	0	0.01	0.86	0.02
45.03	115.08	70.04	160.11	Unkwnown	0	0.01	0.91	0.02
47.04	115.08	68.04	162.11	Unkwnown	0	0.11	0.81	0.02
57.03	115.08	58.04	172.11	Unkwnown	0	0.17	0.91	0.03
59.05	115.08	56.03	174.12	Unkwnown	0	0.01	0.9	0.03
59.09	115.08	55.99	174.16	Unkwnown	0	0.16	0.81	0.03
69.03	115.08	46.04	184.11	Unkwnown	0	0.5	0.84	0.03
73.07	115.08	42.01	188.14	Unkwnown	0.01	0.06	0.81	0.04
83.01	115.08	32.07	198.09	Unkwnown	0	1.83	0.9	0.04
83.05	115.08	32.03	198.12	Unkwnown	0	0.22	0.9	0.04
85.07	115.08	30.01	200.14	Unkwnown	0	0.42	0.89	0.04
86.04	115.08	29.04	201.11	Unkwnown	0	2.34	0.83	0.04
87.04	115.08	28.03	202.12	C2H4	0	0.34	0.97	0.04
87.08	115.08	28	202.16	C2H4	0	0.63	0.92	0.04
97.04	115.08	18.04	212.12	H2O	0	0.36	0.89	0.05
97.07	115.08	18.01	212.14	H2O	0	0.25	0.83	0.05
98.98	115.08	16.1	214.05	Unkwnown	0	1.22	0.86	0.05
99.08	115.08	16	214.16	Unkwnown	0	0.47	0.85	0.05
101.06	115.08	14.02	216.14	CH2	0	0.45	0.98	0.05
101.1	115.08	13.98	216.17	CH2	0	1.21	0.93	0.05
102.07	115.08	13.01	217.14	Unkwnown	0.01	2.62	0.88	0.05
103.03	115.08	12.04	218.11	C	0	1.84	0.9	0.05
103.04	115.08	12.03	218.12	C	0	1.4	0.88	0.05
113.1	115.08	1.98	228.17	Isotope-2	0	0.57	0.8	0.06
31.02	115.11	84.09	146.13	Unkwnown	-0.01	0.01	0.87	0.02
31.03	115.11	84.08	146.14	Unkwnown	-0.01	0.02	0.87	0.02
33.03	115.11	82.08	148.15	Unkwnown	0	0	0.84	0.02
33.05	115.11	82.07	148.16	Unkwnown	0	0	0.83	0.02
43.02	115.11	72.09	158.13	Unkwnown	0	0	0.84	0.02
45.03	115.11	70.08	160.15	Unkwnown	0	0.01	0.91	0.02
47.04	115.11	68.08	162.15	Unkwnown	0	0.05	0.8	0.02
57.03	115.11	58.08	172.15	Unkwnown	0	0.08	0.89	0.03
59.05	115.11	56.06	174.16	Unkwnown	0	0	0.88	0.03
59.09	115.11	56.03	174.2	Unkwnown	0	0.08	0.84	0.03
69.03	115.11	46.08	184.15	Unkwnown	0	0.23	0.84	0.03
73.07	115.11	42.05	188.18	Unkwnown	0	0.03	0.84	0.04
80.05	115.11	35.06	195.16	Unkwnown	0	0.29	0.84	0.04
83	115.11	32.11	198.11	Unkwnown	0	0.03	0.8	0.04
83.01	115.11	32.1	198.12	Unkwnown	0	0.85	0.9	0.04
83.05	115.11	32.06	198.16	Unkwnown	0	0.1	0.88	0.04
85.07	115.11	30.05	200.18	Unkwnown	0	0.2	0.91	0.04
86.04	115.11	29.08	201.15	Unkwnown	0	1.07	0.82	0.04
87.04	115.11	28.07	202.16	Unkwnown	0	0.15	0.92	0.04
87.08	115.11	28.03	202.19	C2H4	0	0.29	0.93	0.04
97.04	115.11	18.07	212.15	H2O	0	0.16	0.89	0.05
97.07	115.11	18.05	212.18	H2O	0	0.12	0.84	0.05
98.98	115.11	16.14	214.09	Unkwnown	0	0.53	0.81	0.05
99.08	115.11	16.03	214.19	Unkwnown	0	0.22	0.89	0.05
101.06	115.11	14.05	216.17	CH2	0	0.2	0.92	0.05
101.1	115.11	14.02	216.21	CH2	0	0.57	0.95	0.05
102.07	115.11	13.04	217.18	Unkwnown	0.01	1.26	0.91	0.05
103.03	115.11	12.08	218.14	Unkwnown	0	0.86	0.91	0.05
103.04	115.11	12.07	218.15	C	0	0.64	0.87	0.05
113.1	115.11	2.02	228.21	Isotope-2	0	0.28	0.84	0.06
115.08	115.11	0.04	230.19	Resolution	0	0.44	0.96	0.06
31.02	115.12	84.11	146.14	Unkwnown	-0.01	0.01	0.86	0.02
31.03	115.12	84.09	146.15	Unkwnown	-0.01	0.01	0.85	0.02
33.03	115.12	82.09	148.16	Unkwnown	0	0	0.81	0.02
33.05	115.12	82.08	148.17	Unkwnown	0	0	0.81	0.02
41.04	115.12	74.08	156.16	Unkwnown	0	0.01	0.82	0.02
44.06	115.12	71.06	159.19	Unkwnown	0	0.38	0.83	0.02
45.03	115.12	70.09	160.16	Unkwnown	0	0	0.85	0.02
57.03	115.12	58.09	172.16	Unkwnown	0	0.05	0.83	0.03
59.09	115.12	56.04	174.21	Unkwnown	0	0.06	0.81	0.03
68.05	115.12	47.07	183.17	Unkwnown	0	0.28	0.8	0.03
73.07	115.12	42.06	188.19	Unkwnown	0	0.02	0.83	0.04
77.06	115.12	38.06	192.18	Unkwnown	0	0.2	0.85	0.04
80.05	115.12	35.07	195.17	Unkwnown	0	0.21	0.83	0.04
82.99	115.12	32.13	198.11	Unkwnown	0	1.05	0.84	0.04
83	115.12	32.12	198.12	Unkwnown	0	0.02	0.81	0.04
83.01	115.12	32.11	198.13	Unkwnown	0	0.59	0.84	0.04
83.05	115.12	32.07	198.17	Unkwnown	0	0.07	0.8	0.04
84.08	115.12	31.04	199.2	Unkwnown	0	0.28	0.83	0.04
85.07	115.12	30.06	200.19	Unkwnown	0	0.14	0.88	0.04
87.08	115.12	28.04	202.2	C2H4	0	0.2	0.87	0.04
97.04	115.12	18.08	212.16	Unkwnown	0	0.11	0.82	0.05
97.07	115.12	18.06	212.19	H2O	0	0.09	0.82	0.05
99.08	115.12	16.04	214.2	Unkwnown	0	0.17	0.88	0.05
99.09	115.12	16.03	214.22	Unkwnown	0	0.12	0.82	0.05
101.1	115.12	14.03	216.22	CH2	0	0.41	0.92	0.05
102.07	115.12	13.06	217.19	Unkwnown	0	0.95	0.93	0.05
103.03	115.12	12.09	218.16	Unkwnown	0	0.6	0.85	0.05
110.06	115.12	5.06	225.18	Unkwnown	0	0.59	0.84	0.06
113.1	115.12	2.03	228.22	Isotope-2	0	0.21	0.85	0.06
115.08	115.12	0.05	230.2	Resolution	0	0.28	0.83	0.06
115.11	115.12	0.01	230.24	Resolution	0	0.7	0.94	0.06
88.11	116.14	28.03	204.26	C2H4	0	0.24	0.82	0.04
43.02	117.07	74.05	160.09	Unkwnown	0	0.01	0.87	0.02
45.03	117.07	72.04	162.1	Unkwnown	0	0.01	0.84	0.02
57.03	117.07	60.04	174.1	Unkwnown	0	0.11	0.84	0.03
61.03	117.07	56.04	178.1	Unkwnown	0	0.02	0.85	0.03
83.01	117.07	34.06	200.08	Unkwnown	0	1.18	0.81	0.04
83.05	117.07	34.02	200.12	Unkwnown	0	0.14	0.82	0.04
87.04	117.07	30.03	204.11	Unkwnown	0	0.2	0.81	0.04
89.02	117.07	28.05	206.09	C2H4	0	0.81	0.9	0.04
89.04	117.07	28.03	206.11	C2H4	0	0.25	0.89	0.04
89.06	117.07	28.01	206.13	C2H4	0	0.2	0.84	0.04
103.03	117.07	14.04	220.1	CH2	0	1.25	0.86	0.05
103.04	117.07	14.03	220.11	CH2	0	1.06	0.93	0.05
103.08	117.07	14	220.15	CH2	0	0.81	0.95	0.05
43.02	117.08	74.06	160.1	Unkwnown	0	0.01	0.86	0.02
45.03	117.08	72.05	162.11	Unkwnown	0	0.01	0.82	0.02
57.03	117.08	60.05	174.11	Unkwnown	0	0.11	0.82	0.03
61.03	117.08	56.05	178.11	Unkwnown	0	0.02	0.84	0.03
83.05	117.08	34.03	200.13	Unkwnown	0	0.14	0.8	0.04
89.02	117.08	28.06	206.1	C2H4	0	0.84	0.9	0.04
89.04	117.08	28.04	206.12	C2H4	0	0.26	0.9	0.04
89.06	117.08	28.02	206.14	C2H4	0	0.22	0.86	0.04
103.03	117.08	14.05	220.11	CH2	0	1.28	0.84	0.05
103.04	117.08	14.04	220.12	CH2	0	1.09	0.92	0.05
103.08	117.08	14	220.15	CH2	0	0.85	0.96	0.05
117.07	117.08	0.01	234.15	Resolution	0	1.04	1	0.06
43.02	117.09	74.07	160.11	Unkwnown	0	0.01	0.83	0.02
61.03	117.09	56.06	178.12	Unkwnown	0	0.02	0.83	0.03
89.02	117.09	28.07	206.11	Unkwnown	0	0.8	0.89	0.04
89.04	117.09	28.05	206.13	C2H4	0	0.26	0.92	0.04
89.06	117.09	28.03	206.15	C2H4	0	0.22	0.89	0.04
103.03	117.09	14.06	220.12	CH2	0	1.2	0.81	0.05
103.04	117.09	14.05	220.13	CH2	0	1.04	0.9	0.05
103.08	117.09	14.02	220.17	CH2	0	0.83	0.96	0.05
117.07	117.09	0.02	234.16	Resolution	0	1	0.99	0.06
117.08	117.09	0.01	234.17	Resolution	0	0.97	1	0.06
43.02	117.1	74.08	160.12	Unkwnown	0	0.01	0.8	0.02
61.03	117.1	56.07	178.13	Unkwnown	0	0.02	0.81	0.03
89.02	117.1	28.08	206.13	Unkwnown	0	0.73	0.87	0.04
89.04	117.1	28.06	206.14	C2H4	0	0.24	0.92	0.04
89.06	117.1	28.04	206.16	C2H4	0	0.21	0.91	0.04
89.1	117.1	28.01	206.2	C2H4	0.01	0.81	0.8	0.04
103.04	117.1	14.06	220.14	CH2	0	0.94	0.87	0.05
103.08	117.1	14.03	220.18	CH2	0	0.77	0.95	0.05
117.07	117.1	0.03	234.17	Resolution	0	0.92	0.97	0.06
117.08	117.1	0.02	234.18	Resolution	0	0.89	0.98	0.06
117.09	117.1	0.01	234.19	Resolution	0	0.93	0.99	0.06
89.1	117.13	28.03	206.22	C2H4	0	0.26	0.83	0.04
90.06	117.13	27.07	207.18	Unkwnown	0	1.41	0.91	0.05
103.11	117.13	14.02	220.24	CH2	0	1.16	0.87	0.05
118.07	118.08	0.01	236.14	Resolution	0	0.88	0.98	0.06
118.07	118.08	0.02	236.15	Resolution	0	0.81	0.96	0.06
118.08	118.08	0	236.16	Resolution	0	0.92	0.99	0.06
118.07	118.09	0.02	236.15	Resolution	0	0.61	0.93	0.06
118.08	118.09	0.01	236.16	Resolution	0	0.71	0.98	0.06
118.08	118.09	0	236.17	Resolution	0	0.78	0.99	0.06
53.03	119.06	66.03	172.09	Unkwnown	0	0.29	0.88	0.03
65.02	119.06	54.04	184.08	Unkwnown	0	1.11	0.85	0.03
69.03	119.06	50.03	188.09	Unkwnown	0	0.49	0.82	0.03
79.05	119.06	40.01	198.11	Unkwnown	0	0.08	0.9	0.04
80.05	119.06	39.01	199.11	Unkwnown	0	0.66	0.87	0.04
83.01	119.06	36.05	202.07	Unkwnown	0	1.67	0.81	0.04
83.05	119.06	36.01	202.11	Unkwnown	0	0.2	0.82	0.04
87.08	119.06	31.98	206.14	Unkwnown	0.01	0.55	0.8	0.04
92.06	119.06	27	211.12	Unkwnown	0.01	0.42	0.82	0.05
106.08	119.06	12.98	225.14	Unkwnown	0.01	0.96	0.86	0.05
107.05	119.06	12.01	226.11	C	0.01	0.15	0.92	0.05
107.09	119.06	11.97	226.15	C	0.01	0.06	0.9	0.05
108.06	119.06	11	227.12	Unkwnown	0	0.71	0.84	0.05
108.08	119.06	10.98	227.14	Unkwnown	0.01	0.53	0.9	0.05
108.09	119.06	10.97	227.15	Unkwnown	0.01	0.54	0.9	0.05
53.03	119.09	66.06	172.11	Unkwnown	0	0.32	0.88	0.03
65.02	119.09	54.07	184.11	Unkwnown	0	1.25	0.85	0.03
79.05	119.09	40.03	198.14	Unkwnown	0	0.09	0.89	0.04
80.05	119.09	39.04	199.14	Unkwnown	0	0.73	0.86	0.04
92.06	119.09	27.02	211.15	Unkwnown	0.01	0.48	0.83	0.05
106.08	119.09	13.01	225.16	Unkwnown	0.01	1.1	0.87	0.05
107.05	119.09	12.04	226.14	C	0.01	0.16	0.92	0.05
107.09	119.09	12	226.17	C	0.01	0.06	0.91	0.05
108.06	119.09	11.03	227.14	Unkwnown	0	0.81	0.84	0.05
108.08	119.09	11.01	227.17	Unkwnown	0.01	0.6	0.92	0.05
108.09	119.09	10.99	227.18	Unkwnown	0.01	0.62	0.92	0.05
119.06	119.09	0.03	238.15	Resolution	0	1.12	0.99	0.06
53.03	120.08	67.06	173.11	Unkwnown	-0.01	0.12	0.86	0.03
65.02	120.08	55.06	185.1	Unkwnown	-0.01	0.48	0.86	0.03
79.05	120.08	41.03	199.14	Unkwnown	0	0.03	0.89	0.04
80.05	120.08	40.03	200.13	Unkwnown	0	0.27	0.83	0.04
92.06	120.08	28.02	212.14	C2H4	0	0.19	0.87	0.05
106.08	120.08	14	226.16	CH2	0	0.43	0.89	0.05
107.05	120.08	13.03	227.13	Unkwnown	0	0.06	0.91	0.05
107.09	120.08	13	227.17	Unkwnown	0	0.02	0.88	0.05
108.06	120.08	12.02	228.14	C	0	0.33	0.89	0.05
108.08	120.08	12	228.16	C	0	0.24	0.93	0.05
108.09	120.08	11.99	228.17	C	0	0.24	0.92	0.05
119.06	120.08	1.02	239.14	Isotope-1	0	0.39	0.9	0.06
119.09	120.08	1	239.17	Isotope-1	0	0.35	0.91	0.06
41.04	121.05	80.01	162.09	Unkwnown	0	0.04	0.84	0.02
45.03	121.05	76.02	166.09	Unkwnown	0	0.02	0.84	0.02
47.04	121.05	74.02	168.09	Unkwnown	0	0.19	0.8	0.02
47.05	121.05	74	168.1	Unkwnown	0	0.25	0.83	0.02
47.06	121.05	73.99	168.11	Unkwnown	0	0.29	0.82	0.02
53.03	121.05	68.03	174.08	Unkwnown	-0.01	0.54	0.92	0.03
65.02	121.05	56.03	186.07	Unkwnown	-0.01	2.04	0.87	0.03
69.03	121.05	52.02	190.09	Unkwnown	-0.01	0.91	0.84	0.03
73.07	121.05	47.99	194.12	Unkwnown	0.01	0.1	0.81	0.04
79.05	121.05	42	200.11	Unkwnown	0	0.14	0.91	0.04
80.05	121.05	41	201.1	Unkwnown	0	1.19	0.88	0.04
83.01	121.05	38.04	204.06	Unkwnown	0	3.11	0.84	0.04
83.05	121.05	38	204.1	Unkwnown	0	0.37	0.85	0.04
85.07	121.05	35.99	206.12	Unkwnown	-0.01	0.72	0.84	0.04
87.08	121.05	33.97	208.13	Unkwnown	0.01	1.03	0.84	0.04
92.06	121.05	28.99	213.11	Unkwnown	0.01	0.82	0.88	0.05
97.04	121.05	24.01	218.09	Unkwnown	0	0.57	0.8	0.05
97.07	121.05	23.99	218.12	Unkwnown	0	0.47	0.84	0.05
99.08	121.05	21.97	220.13	Unkwnown	0	0.82	0.83	0.05
106.08	121.05	14.97	227.13	Unkwnown	0.02	1.73	0.86	0.05
107.05	121.05	14	228.1	CH2	0.01	0.26	0.92	0.05
107.09	121.05	13.97	228.14	CH2	0.02	0.1	0.86	0.05
108.06	121.05	13	229.11	Unkwnown	0	1.42	0.93	0.05
108.08	121.05	12.97	229.13	Unkwnown	0.01	0.98	0.93	0.05
108.09	121.05	12.96	229.15	Unkwnown	0.01	0.97	0.9	0.05
119.06	121.05	1.99	240.11	Isotope-2	0	1.66	0.92	0.06
119.09	121.05	1.97	240.14	Isotope-2	0	1.46	0.91	0.06
120.08	121.05	0.97	241.13	Isotope-1	0.02	3.87	0.93	0.06
53.03	121.07	68.04	174.09	Unkwnown	-0.02	1.04	0.86	0.03
65.02	121.07	56.05	186.09	Unkwnown	-0.02	4.02	0.83	0.03
79.05	121.07	42.01	200.12	Unkwnown	-0.01	0.28	0.88	0.04
80.05	121.07	41.02	201.11	Unkwnown	0	2.31	0.82	0.04
92.06	121.07	29	213.13	Unkwnown	0.01	1.65	0.86	0.05
106.08	121.07	14.99	227.14	Unkwnown	0.02	3.68	0.88	0.05
107.05	121.07	14.02	228.11	CH2	0.01	0.56	0.94	0.05
107.09	121.07	13.98	228.15	CH2	0.02	0.21	0.91	0.05
108.06	121.07	13.01	229.12	Unkwnown	-0.01	2.81	0.89	0.05
108.08	121.07	12.98	229.15	Unkwnown	0	2.05	0.94	0.05
108.09	121.07	12.97	229.16	Unkwnown	0.01	2.1	0.94	0.05
119.06	121.07	2.01	240.13	Isotope-2	-0.01	3.41	0.91	0.06
119.09	121.07	1.98	240.15	Isotope-2	-0.01	3.04	0.91	0.06
120.08	121.07	0.98	241.15	Isotope-1	0.03	8.33	0.96	0.06
121.05	121.07	0.01	242.12	Resolution	-0.01	2.02	0.97	0.06
53.03	121.09	68.06	174.12	Unkwnown	-0.05	1.74	0.82	0.03
65.02	121.09	56.07	186.11	Unkwnown	-0.05	6.9	0.81	0.03
79.05	121.09	42.04	200.14	Unkwnown	-0.03	0.49	0.87	0.04
92.06	121.09	29.03	213.15	Unkwnown	0	2.82	0.83	0.05
106.08	121.09	15.01	227.17	Unkwnown	0.02	6.49	0.88	0.05
107.05	121.09	14.04	228.14	CH2	0	0.98	0.94	0.05
107.09	121.09	14	228.18	CH2	0.02	0.38	0.93	0.05
108.06	121.09	13.03	229.15	Unkwnown	-0.02	4.72	0.85	0.05
108.08	121.09	13.01	229.17	Unkwnown	-0.01	3.57	0.93	0.05
108.09	121.09	13	229.18	Unkwnown	0	3.71	0.94	0.05
119.06	121.09	2.03	240.15	Isotope-2	-0.04	5.9	0.9	0.06
119.09	121.09	2	240.18	Isotope-2	-0.03	5.3	0.9	0.06
120.08	121.09	1.01	241.17	Isotope-1	0.03	14.65	0.96	0.06
121.05	121.09	0.04	242.14	Resolution	-0.03	3.42	0.93	0.06
121.07	121.09	0.02	242.15	Resolution	-0.01	1.75	0.99	0.06
79.05	121.1	42.05	200.16	Unkwnown	-0.03	0.48	0.85	0.04
92.06	121.1	29.04	213.16	Unkwnown	0	2.8	0.82	0.05
106.08	121.1	15.02	227.18	Unkwnown	0.02	6.46	0.88	0.05
107.05	121.1	14.05	228.15	CH2	-0.01	0.97	0.93	0.05
107.09	121.1	14.02	228.19	CH2	0.01	0.38	0.93	0.05
108.06	121.1	13.04	229.16	Unkwnown	-0.03	4.66	0.83	0.05
108.08	121.1	13.02	229.18	Unkwnown	-0.01	3.56	0.93	0.05
108.09	121.1	13.01	229.19	Unkwnown	0	3.71	0.94	0.05
119.06	121.1	2.04	240.16	Isotope-2	-0.04	5.82	0.88	0.06
119.09	121.1	2.02	240.19	Isotope-2	-0.04	5.25	0.89	0.06
120.08	121.1	1.02	241.18	Isotope-1	0.03	14.61	0.96	0.06
121.05	121.1	0.05	242.15	Resolution	-0.03	3.37	0.92	0.06
121.07	121.1	0.04	242.17	Resolution	-0.02	1.74	0.99	0.06
121.09	121.1	0.01	242.19	Resolution	0	1	1	0.06
53.03	122.08	69.06	175.11	Unkwnown	0.01	0.2	0.82	0.03
107.05	122.08	15.04	229.13	Unkwnown	0.01	0.1	0.87	0.05
107.09	122.08	15	229.17	Unkwnown	0.01	0.04	0.84	0.05
108.08	122.08	14	230.17	CH2	0.01	0.38	0.85	0.05
108.09	122.08	13.99	230.18	CH2	0.01	0.39	0.85	0.05
119.06	122.08	3.02	241.14	Isotope-3	0.01	0.68	0.89	0.06
119.09	122.08	3	241.17	Isotope-3	0.01	0.59	0.87	0.06
120.08	122.08	2	242.17	Isotope-2	0.02	1.49	0.84	0.06
121.05	122.08	1.03	243.14	Isotope-1	0.01	0.38	0.89	0.06
121.07	122.08	1.02	243.15	Isotope-1	0.01	0.19	0.91	0.06
121.09	122.08	1	243.17	Isotope-1	0.01	0.1	0.9	0.06
121.1	122.08	0.98	243.19	Isotope-1	0.01	0.1	0.89	0.06
122.06	122.08	0.02	244.14	Resolution	0	1.18	0.86	0.06
53.03	122.1	69.07	175.12	Unkwnown	0	0.21	0.86	0.03
65.02	122.1	57.08	187.12	Unkwnown	0	0.8	0.81	0.03
79.05	122.1	43.04	201.15	Unkwnown	0	0.06	0.86	0.04
92.06	122.1	30.03	214.16	Unkwnown	0.01	0.32	0.81	0.05
106.08	122.1	16.02	228.17	Unkwnown	0.01	0.73	0.86	0.05
107.05	122.1	15.05	229.15	Unkwnown	0.01	0.11	0.92	0.05
107.09	122.1	15.01	229.18	Unkwnown	0.01	0.04	0.9	0.05
108.06	122.1	14.04	230.15	CH2	0	0.56	0.87	0.05
108.08	122.1	14.02	230.18	CH2	0	0.41	0.93	0.05
108.09	122.1	14	230.19	CH2	0.01	0.42	0.92	0.05
119.06	122.1	3.04	241.16	Isotope-3	0	0.68	0.9	0.06
119.09	122.1	3.01	241.18	Isotope-3	0	0.61	0.91	0.06
120.08	122.1	2.02	242.18	Isotope-2	0.01	1.65	0.94	0.06
121.05	122.1	1.04	243.15	Isotope-1	0	0.4	0.94	0.06
121.07	122.1	1.03	243.16	Isotope-1	0	0.2	0.98	0.06
121.09	122.1	1.01	243.19	Isotope-1	0.01	0.11	0.97	0.06
121.1	122.1	1	243.2	Isotope-1	0.01	0.11	0.97	0.06
122.08	122.1	0.01	244.18	Resolution	0	0.95	0.96	0.06
41	123.09	82.09	164.09	Unkwnown	-0.11	9.87	0.81	0.02
41.04	123.09	82.05	164.13	Unkwnown	0	0.13	0.89	0.02
44.06	123.09	79.03	167.15	Unkwnown	-0.01	6.73	0.82	0.02
54.05	123.09	69.05	177.14	Unkwnown	0.04	8.37	0.81	0.03
57.07	123.09	66.02	180.16	Unkwnown	0	0.29	0.95	0.03
68.05	123.09	55.04	191.14	Unkwnown	0	5.8	0.93	0.03
69.07	123.09	54.02	192.16	Unkwnown	0.01	0.45	0.93	0.03
71.09	123.09	52.01	194.18	Unkwnown	-0.01	0.64	0.95	0.04
82.08	123.09	41.01	205.17	Unkwnown	0.03	2.9	0.83	0.04
83	123.09	40.09	206.09	Unkwnown	-0.01	0.43	0.88	0.04
83.09	123.09	40.01	206.18	Unkwnown	0.01	0.59	0.93	0.04
84.08	123.09	39.01	207.17	Unkwnown	0.01	5.32	0.89	0.04
85.1	123.09	37.99	208.19	Unkwnown	0	1	0.95	0.04
86.1	123.09	37	209.19	Unkwnown	0.03	10.14	0.93	0.04
91.04	123.09	32.05	214.13	Unkwnown	0.05	0.43	0.81	0.05
91.05	123.09	32.04	214.14	Unkwnown	0.05	0.37	0.81	0.05
91.06	123.09	32.03	214.15	Unkwnown	0.05	0.36	0.81	0.05
95.05	123.09	28.04	218.14	C2H4	0.02	0.25	0.82	0.05
95.09	123.09	28.01	218.18	C2H4	0.01	0.4	0.98	0.05
96.06	123.09	27.04	219.15	Unkwnown	0	4.77	0.94	0.05
97.07	123.09	26.03	220.16	C2H2	0.01	1.53	0.82	0.05
97.1	123.09	25.99	220.19	C2H2	0.01	0.73	0.95	0.05
99.09	123.09	24	222.18	Unkwnown	0	2.26	0.87	0.05
99.1	123.09	23.99	222.2	Unkwnown	0.01	2.13	0.89	0.05
99.12	123.09	23.98	222.21	Unkwnown	0.01	2.26	0.9	0.05
109.07	123.09	14.03	232.16	CH2	0.01	1.08	0.96	0.05
109.08	123.09	14.02	232.17	CH2	0.01	0.62	0.98	0.05
109.09	123.09	14	232.18	CH2	0.01	0.51	0.99	0.05
109.1	123.09	13.99	232.19	CH2	0.01	0.5	0.99	0.05
110.06	123.09	13.03	233.15	Unkwnown	0.04	11.15	0.88	0.06
110.07	123.09	13.02	233.17	Unkwnown	0.01	6.79	0.97	0.06
110.08	123.09	13.01	233.18	Unkwnown	0.01	4.77	0.98	0.06
110.11	123.09	12.98	233.2	Unkwnown	0.01	4.2	0.99	0.06
111.09	123.09	12	234.18	C	0.03	0.65	0.82	0.06
111.1	123.09	11.99	234.2	C	0.01	0.92	0.94	0.06
111.12	123.09	11.98	234.21	C	0.01	1.02	0.96	0.06
112.11	123.09	10.98	235.2	Unkwnown	0.02	7.48	0.96	0.06
113.1	123.09	10	236.19	Unkwnown	0.02	3.5	0.8	0.06
113.11	123.09	9.99	236.2	Unkwnown	0.01	3.04	0.85	0.06
79.05	124.04	44.99	203.09	Unkwnown	0.01	0.02	0.8	0.04
83.01	124.04	41.03	207.05	Unkwnown	0	0.48	0.81	0.04
105.04	124.04	19	229.08	Unkwnown	0	0.08	0.82	0.05
53.03	124.06	71.03	177.08	Unkwnown	0	0.09	0.84	0.03
69.03	124.06	55.02	193.09	Unkwnown	0	0.16	0.8	0.03
79.05	124.06	45	203.11	Unkwnown	0.01	0.02	0.83	0.04
80.05	124.06	44.01	204.11	Unkwnown	0.01	0.2	0.82	0.04
83.01	124.06	41.05	207.07	Unkwnown	0	0.55	0.83	0.04
83.05	124.06	41.01	207.11	Unkwnown	0.01	0.06	0.83	0.04
105.04	124.06	19.02	229.09	Unkwnown	0	0.08	0.82	0.05
115.11	124.06	8.95	239.17	Unkwnown	0.01	0.57	0.82	0.06
121.05	124.06	3.01	245.11	Isotope-3	0.01	0.15	0.82	0.06
124.04	124.06	0.02	248.1	Resolution	0	1.11	0.99	0.06
45.03	125.04	80.01	170.08	Unkwnown	0	0.01	0.83	0.02
57.03	125.04	68.01	182.08	Unkwnown	0	0.09	0.81	0.03
59.05	125.04	65.99	184.09	Unkwnown	0.01	0	0.82	0.03
69.03	125.04	56.01	194.08	Unkwnown	0	0.32	0.86	0.03
83.01	125.04	42.03	208.05	Unkwnown	0	1.09	0.87	0.04
83.05	125.04	41.99	208.09	Unkwnown	0	0.13	0.88	0.04
87.04	125.04	38	212.09	Unkwnown	0	0.19	0.91	0.04
87.08	125.04	37.96	212.12	Unkwnown	0.01	0.34	0.82	0.04
97.04	125.04	28	222.08	C2H4	0	0.21	0.86	0.05
98.98	125.04	26.07	224.02	C2H2	0	0.73	0.84	0.05
101.06	125.04	23.98	226.1	Unkwnown	0	0.25	0.89	0.05
103.03	125.04	22.01	228.07	Unkwnown	0	1.04	0.83	0.05
103.04	125.04	22	228.08	Unkwnown	0	0.81	0.83	0.05
115.08	125.04	9.97	240.12	Unkwnown	0	0.56	0.92	0.06
115.11	125.04	9.93	240.15	Unkwnown	0	1.12	0.85	0.06
43.02	125.06	82.04	168.08	Unkwnown	0	0.01	0.82	0.02
45.03	125.06	80.03	170.09	Unkwnown	0	0.01	0.88	0.02
57.03	125.06	68.03	182.09	Unkwnown	0	0.14	0.86	0.03
59.05	125.06	66.01	184.11	Unkwnown	0.01	0	0.85	0.03
69.03	125.06	56.03	194.09	Unkwnown	0	0.46	0.9	0.03
80.05	125.06	45.01	205.11	Unkwnown	0.01	0.51	0.8	0.04
83.01	125.06	42.05	208.07	Unkwnown	0	1.56	0.91	0.04
83.05	125.06	42.01	208.11	Unkwnown	0	0.19	0.92	0.04
85.07	125.06	40	210.13	Unkwnown	0	0.35	0.86	0.04
86.04	125.06	39.02	211.1	Unkwnown	0	1.96	0.82	0.04
87.04	125.06	38.02	212.1	Unkwnown	0	0.27	0.93	0.04
87.08	125.06	37.98	212.14	Unkwnown	0.01	0.5	0.88	0.04
97.04	125.06	28.02	222.1	C2H4	0	0.3	0.9	0.05
97.07	125.06	28	222.13	C2H4	0	0.22	0.84	0.05
98.98	125.06	26.09	224.04	Unkwnown	0	0.99	0.83	0.05
99.08	125.06	25.98	224.14	C2H2	0	0.38	0.81	0.05
101.06	125.06	24	226.12	Unkwnown	0	0.36	0.91	0.05
101.1	125.06	23.96	226.16	Unkwnown	0	0.93	0.85	0.05
102.07	125.06	22.99	227.13	Unkwnown	0.01	2.05	0.81	0.05
103.03	125.06	22.03	228.09	Unkwnown	0	1.51	0.87	0.05
103.04	125.06	22.02	228.1	Unkwnown	0	1.19	0.88	0.05
115.08	125.06	9.99	240.14	Unkwnown	0	0.8	0.94	0.06
115.11	125.06	9.95	240.17	Unkwnown	0	1.62	0.89	0.06
117.07	125.06	7.99	242.13	Unkwnown	0.01	0.97	0.82	0.06
119.06	125.06	6	244.12	Unkwnown	0	0.68	0.81	0.06
121.05	125.06	4.01	246.11	Isotope-4	0.01	0.38	0.82	0.06
124.06	125.06	1	249.12	Isotope-1	0	2.11	0.81	0.06
125.04	125.06	0.02	250.1	Resolution	0	1.36	0.98	0.06
31.03	125.07	94.04	156.1	Unkwnown	-0.01	0.04	0.81	0.02
43.02	125.07	82.05	168.09	Unkwnown	0	0.01	0.83	0.02
45.03	125.07	80.04	170.1	Unkwnown	0	0.01	0.9	0.02
57.03	125.07	68.04	182.1	Unkwnown	0	0.17	0.88	0.03
59.05	125.07	66.02	184.12	Unkwnown	0.01	0.01	0.87	0.03
69.03	125.07	56.04	194.1	Unkwnown	0	0.58	0.91	0.03
80.05	125.07	45.02	205.12	Unkwnown	0.01	0.65	0.83	0.04
83.01	125.07	42.06	208.08	Unkwnown	0	1.98	0.92	0.04
83.05	125.07	42.02	208.12	Unkwnown	0	0.24	0.94	0.04
85.07	125.07	40.01	210.14	Unkwnown	0	0.45	0.89	0.04
86.04	125.07	39.04	211.11	Unkwnown	0	2.44	0.83	0.04
87.04	125.07	38.03	212.12	Unkwnown	0	0.34	0.94	0.04
87.08	125.07	37.99	212.15	Unkwnown	0.01	0.64	0.9	0.04
97.04	125.07	28.03	222.11	C2H4	0	0.38	0.92	0.05
97.07	125.07	28.01	222.14	C2H4	0	0.28	0.88	0.05
98.98	125.07	26.1	224.05	Unkwnown	0	1.24	0.83	0.05
99.08	125.07	25.99	224.15	C2H2	0	0.49	0.85	0.05
101.06	125.07	24.01	226.13	Unkwnown	0	0.45	0.92	0.05
101.1	125.07	23.98	226.17	Unkwnown	0.01	1.2	0.88	0.05
102.07	125.07	23	227.14	Unkwnown	0.01	2.63	0.84	0.05
103.03	125.07	22.04	228.1	Unkwnown	0	1.91	0.89	0.05
103.04	125.07	22.03	228.11	Unkwnown	0	1.5	0.89	0.05
115.08	125.07	10	240.15	Unkwnown	0	1	0.95	0.06
115.11	125.07	9.96	240.18	Unkwnown	0	2.06	0.9	0.06
117.07	125.07	8	242.14	Unkwnown	0.01	1.23	0.83	0.06
117.08	125.07	7.99	242.15	Unkwnown	0.01	1.14	0.81	0.06
119.06	125.07	6.01	244.13	Unkwnown	0.01	0.85	0.82	0.06
121.05	125.07	4.02	246.12	Isotope-4	0.01	0.49	0.84	0.06
[truncated: 2,849 more rows]
